# Supplementary material
Source: publisher figshare collection journal article supplement (https://gsajournals.figshare.com/ndownloader/files/13747295)
Supplement: Supplementary file 1 [file 13747295]

## Sheet: Table S1
Table S1 - Statistics of the small RNA sequencing analysis.
		Total	rRNA		miRNA		genome		FHVFHV∆B2eGFP			FHV∆B2eGFP (21 nt reads)		FHV∆B2eGFP (23-30 nt reads)
Genotype	Replicate	N	N	% total	N	% total	N (-rRNA, -miRNA)	% total	N	% total (-rRNA, -miRNA)	% genome	N	% FHV	N	% FHV
UAS-FHV∆B2eGFP,UAS-CrPV-1A	1	25932085	16427246	0.633472	1570236	0.0605519	5805569	0.223876	53151	0.00669863	0.00915517	8538	0.160637	11752	0.221106
	2	26477078	4637585	0.175155	8065410	0.304619	12331933	0.465759	33132	0.00240539	0.00268668	16481	0.497435	3057	0.0922673
tj-Gal4;UAS-FHV∆B2eGFP	1	28047728	5418860	0.193201	7056187	0.251578	14381441	0.512749	88790	0.00570165	0.00617393	57624	0.648992	5776	0.0650524
	2	20847650	6489474	0.311281	3902812	0.187206	8648574	0.414846	92005	0.00879979	0.0106382	56258	0.611467	5527	0.0600728
tj-Gal4,Dcr2 −/− ;UAS-FHV∆B2eGFP	1	29656416	5462375	0.184189	7048670	0.237678	12820141	0.432289	492431	0.0287209	0.0384107	49864	0.101261	156762	0.318343
	2	26873322	8044032	0.299332	5073560	0.188795	11330271	0.421618	509941	0.0370712	0.045007	37096	0.0727457	146880	0.288033
tj−Gal4;UAS-FHV∆B2eGFP,UAS-CrPV-1A	1	38848928	8662290	0.222974	9400704	0.241981	17940790	0.461809	395966	0.0190497	0.0220707	250028	0.631438	26982	0.0681422
	2	23466670	6446264	0.274699	5511817	0.234879	9874791	0.420801	289366	0.0251435	0.0293035	192963	0.666848	12541	0.0433396
tj−Gal4,UAS-FHV∆B2eGFP;Ago2-/-	1	34438313	13732867	0.398767	4474444	0.129926	12574740	0.365138	265750	0.016373	0.0211336	174245	0.655673	16924	0.0636839
	2	27445692	9736433	0.354753	5736361	0.209008	10561295	0.384807	286544	0.0239327	0.0271315	210408	0.734296	9901	0.0345532
For each Replicate library of a given Genotype, the Total number of reads with >10 nucleotides after quality and adapter trimming, reads that mapped to ribosomal RNAs (rRNA), microRNAs (miRNA) and to the Drosophila melanogaster genome (r6.04), excluding rRNAs and miRNAs (genome) are indicated, together with the percentage relative to the total number of reads (%total). Reads that mapped to the FH…

## Sheet: Table S2
Table S2 - Reads mapping to hairpin RNA loci in small RNA libraries.
FlybaseID	Gene Symbol	tj-Gal4,Dcr2 −/− ;UAS-FHV∆B2eGFP	UAS-FHV∆B2eGFP,UAS-CrPV-1A	tj-Gal4;UAS-FHV∆B2eGFP	tj−Gal4;UAS-FHV∆B2eGFP,UAS-CrPV-1A	tj−Gal4,UAS-FHV∆B2eGFP;Ago2-/-
FBgn0042174	hp-CG18854 (esi1)	238.609	16954	8100.12	15346.7	28503.7
FBgn0285992	hp-CG4068 (esi2)	19.8441	893.77	328.609	1190.36	1105.63
FBgn0062928	hp-pncr009	30.3136	47.5872	25.6397	39.528	56.8287
FBgn0052207	hp-CR32207	13.0849	14.1412	17.6904	18.944	16.9538
FBgn0052205	hp-CR32205	0.928555	0.981953	1.89887	0.952061	16.3424
FBgn0264567	hp-mir-997-2	0.928555	0	0	0	0
FBgn0262262	hp-mir-997-1	0	0	0	0	0
FBgn0262971	hpRNA1	0	0	0	0	0
Shown are the Flybase Ids (FlybaseID) and gene symbol (Gene_Symbol) of hairpin RNA generating loci and the number of reads mapping to each transcript in small RNA libraries prepared from D.melanogaster ovaries of the indicated genotypes. Reads are normalized to total reads, excluding microRNAs and ribosomal RNAs.

## Sheet: Table S3
Table S3 - Differentially expressed genes between FHV∆B2eGFP restrictive (mCherry+GFP-) and permissive (mCherry+GFP+) follicular somatic cells of tj-Gal4,UAS-mCherry::NLS; UAS-FHV∆B2eGFP,UAS-CrPV-1A flies
FlybaseID	Gene_Symbol	mCherry+GFP-	mCherry+GFP+	log2(Fold Change)	p	BH
FBgn0019644	ATPsynB	105.184	1.55203	-7.68999	3.17916e-07	0.00026437
FBgn0038224	CG3321	90.7472	1.58356	-7.5986	1.11417e-06	0.000810701
FBgn0030596	CG12398	160.443	2.33838	-7.10796	4.6905e-06	0.00248213
FBgn0042138	CG18815	120.049	2.42353	-7.01535	3.8866e-06	0.00248213
FBgn0033379	Mys45A	63.4274	1.51681	-6.87281	7.77463e-06	0.00377134
FBgn0260942	bond	201.665	2.08601	-6.21784	0.000105726	0.0256429
FBgn0019957	ND42	106.838	3.60747	-6.14235	2.59275e-05	0.00887789
FBgn0010638	Sec61beta	242.677	6.24853	-5.96671	9.82128e-06	0.00408355
FBgn0033317	CG8635	55.0928	2.43826	-5.77728	0.000170466	0.0342165
FBgn0029975	CG1444	212.975	8.25523	-5.46459	0.000128442	0.0287561
FBgn0025678	CaBP1	462.984	19.5742	-5.10763	4.59236e-06	0.00248213
FBgn0036824	CG3902	179.281	5.742	-5.01675	0.000195936	0.0367917
FBgn0039635	CG11876	175.858	7.34959	-4.80483	5.11444e-05	0.0148856
FBgn0014868	Ost48	212.07	7.79594	-4.74268	0.000212503	0.0378635
FBgn0036147	Plod	123.251	5.5719	-4.62623	0.000214653	0.0378635
FBgn0010100	Acon	242.089	12.0445	-4.17726	7.59475e-05	0.0192213
FBgn0262734	Rbp2	156.599	10.3218	-3.97673	0.000187506	0.0363825
FBgn0003062	Fib	192.639	13.1871	-3.72498	5.85273e-05	0.0154858
FBgn0031745	rau	496.979	40.6675	-3.64435	0.000280451	0.0466431
FBgn0262526	vas	56.7676	5.85139	-3.4554	0.000168603	0.0342165
FBgn0034072	Dg	1207.74	224.268	-2.68329	2.51561e-05	0.00887789
FBgn0011582	DopR	461.045	1951.3	2.33119	0.000110986	0.025842
FBgn0029939	CG9650	973.097	3916.73	2.34537	0.000239863	0.0410659
FBgn0266084	Fhos	228.79	1271.65	2.65931	5.82275e-05	0.0154858
FBgn0015872	Drip	7301.89	38266.9	2.81236	0.000134826	0.0290674
FBgn0267001	Ten-a	773.321	4711.18	2.95957	1.31954e-05	0.0051207
FBgn0030438	CG15721	1014.66	7420.26	2.97186	9.58541e-06	0.00408355
FBgn0264675	CR43960	578.449	3968.99	3.10934	4.61948e-05	0.0141526
FBgn0263627	CR43636	294.274	2441.8	3.30267	3.13261e-09	4.55874e-06
FBgn0033926	Arc1	179.009	1857.17	3.68267	5.26279e-11	1.02116e-07
FBgn0036690	Ilp8	71.4004	864.357	3.88443	1.80737e-07	0.000175345
FBgn0053158	CG33158	161.025	2650.71	4.49268	7.31734e-15	4.25942e-11
FHV_RNA1_FUSION	FHV_RNA1_FUSION	9508.03	1.22597e+06	7.01898	3.59521e-08	4.18554e-05
B2_23aa_GFP	B2(23aa)eGFP	3933.62	597644	7.58704	2.03366e-13	5.91898e-10
FBgn0039319	CG13659	0.459379	30.8421	7.89059	2.88138e-05	0.00931806
Shown are the Flybase Ids (FlybaseID) and official gene symbol (Gene_Symbol) for each differentially expressed gene between the FHV∆B2eGFP restrictive (mCherry+GFP-) and permissive (mCherry+GFP+) fraction, together with the rlog normalized counts in each fraction, log2(Fold Change) and uncorrected (p) and Benjamini & Hochberg corrected (BH) p-values

## Sheet: Table S4
Table S4 - Gene expression (read counts) in the double negative cell fraction (mCherry-GFP-), FHV∆B2eGFP restrictive (mCherry+GFP-) and permissive (mCherry+GFP+) follicular somatic cells of tj-Gal4,UAS-mCherry::NLS; UAS-FHV∆B2eGFP,UAS-CrPV-1A flies
	mCherry-GFP-		mCherry+GFP-			mCherry+GFP+
gene_id	tjFHV-1A_NN-1	tjFHV-1A_NN-2	tjFHV-1A_PN-1	tjFHV-1A_PN-2	tjFHV-1A_PN-3	tjFHV-1A_PP-1	tjFHV-1A_PP-2	tjFHV-1A_PP-3
FBgn0000003	3	0	14	0	0	9	0	0
FBgn0000008	420	225	1519	8824	878	356	586	187
FBgn0000015	10	4	15	0	5	0	0	1
FBgn0000017	644	649	1640	2844	467	1553	669	464
FBgn0000018	6	0	5	0	0	16	0	0
FBgn0000024	4	1	22	251	1	0	1	1
FBgn0000028	2	0	0	0	6	35	1	2
FBgn0000032	68	80	108	0	33	66	0	0
FBgn0000036	4	78	1	2	6	55	3	5
FBgn0000037	0	2	71	510	0	0	84	1
FBgn0000038	0	0	22	126	0	0	0	1
FBgn0000042	6122	4724	9347	15873	2755	6535	2324	2066
FBgn0000043	947	1042	3691	6797	1136	2905	1644	1283
FBgn0000044	136	0	32	162	0	50	0	0
FBgn0000046	155	0	3	0	1	12	0	0
FBgn0000052	500	62	275	204	213	81	1	0
FBgn0000053	477	829	440	381	76	196	1	0
FBgn0000054	69	282	148	100	36	19	0	0
FBgn0000055	334	390	31	0	44	20	168	0
FBgn0000056	334	390	31	0	44	20	168	0
FBgn0000057	126	0	19	383	2	33	0	0
FBgn0000063	221	0	39	128	0	4	0	0
FBgn0000064	694	761	850	1762	443	1032	511	79
FBgn0000075	534	0	276	384	23	176	233	30
FBgn0000083	327	264	688	3344	243	1061	985	150
FBgn0000084	104	173	266	620	99	204	0	110
FBgn0000092	0	0	19	145	0	0	1	0
FBgn0000097	555	873	1277	4802	763	612	423	4
FBgn0000100	3883	2021	5645	6566	2401	1501	1212	536
FBgn0000108	13	1	35	331	1	0	2	138
FBgn0000109	12	0	10	198	34	10	0	179
FBgn0000114	2108	3033	443	535	160	438	572	334
FBgn0000115	109	162	68	42	27	17	0	117
FBgn0000116	690	1339	863	1657	325	436	118	209
FBgn0000117	747	312	953	1319	297	519	182	303
FBgn0000119	549	395	563	669	77	125	2	1
FBgn0000139	36	0	24	153	2	47	0	1
FBgn0000140	322	384	5	1	11	2	0	0
FBgn0000146	202	174	39	239	0	35	1	0
FBgn0000147	98	0	42	983	50	5	182	1
FBgn0000150	2728	2004	1302	976	656	422	354	107
FBgn0000157	6	0	0	3	1	23	0	2
FBgn0000158	68	0	19	194	0	0	0	0
FBgn0000163	611	130	1133	3147	431	834	381	189
FBgn0000166	194	165	0	0	0	0	0	1
FBgn0000173	73	0	231	960	125	83	1	163
FBgn0000179	27	41	33	15	71	15	32	132
FBgn0000180	10	1	17	316	55	37	12	35
FBgn0000181	3132	762	1930	2026	346	211	300	1
FBgn0000182	1608	1993	131	3	5	75	2	1
FBgn0000183	353	503	487	809	128	247	88	125
FBgn0000210	1269	371	2428	2828	1427	1103	1001	977
FBgn0000212	729	151	647	543	166	203	124	107
FBgn0000221	16	71	0	217	35	0	0	0
FBgn0000228	436	760	250	339	86	243	0	138
FBgn0000229	72	0	67	1	0	0	0	0
FBgn0000239	486	650	190	236	112	329	151	1
FBgn0000241	7	0	29	164	0	9	1	0
FBgn0000244	24	2	188	220	28	155	97	131
FBgn0000247	363	217	427	1253	74	196	217	4
FBgn0000250	564	355	516	430	108	788	401	202
FBgn0000251	505	205	20	1	0	50	0	84
FBgn0000253	720	1570	1287	5659	621	1100	1147	777
FBgn0000256	223	228	215	33	88	116	288	76
FBgn0000257	57	0	86	171	48	13	66	0
FBgn0000259	82	630	413	580	255	187	0	117
FBgn0000261	456	594	638	604	179	620	97	202
FBgn0000273	517	641	888	1922	355	663	776	115
FBgn0000283	474	862	376	426	126	146	147	280
FBgn0000286	165	226	141	404	62	197	0	0
FBgn0000289	543	704	638	1017	67	348	125	107
FBgn0000299	9474	1160	3166	1277	375	170	79	3
FBgn0000303	12	3	13	0	6	33	3	1
FBgn0000307	522	475	674	1526	311	403	494	283
FBgn0000308	832	1091	2188	5995	1512	1177	750	458
FBgn0000316	276	83	215	288	18	84	94	0
FBgn0000317	509	467	562	531	542	395	0	55
FBgn0000318	173	3	99	360	61	63	1	1
FBgn0000319	1387	1170	2337	5291	1240	1288	489	567
FBgn0000320	493	1	934	945	169	317	2	1
FBgn0000326	37	128	37	0	0	0	0	0
FBgn0000330	35	75	94	357	15	114	225	0
FBgn0000339	25	294	46	65	7	43	0	0
FBgn0000346	6	279	16	0	0	0	0	3
FBgn0000352	119	84	104	0	0	54	124	0
FBgn0000355	1028	585	20992	28322	2608	39014	12482	12295
FBgn0000356	144	131	7539	4961	394	4809	2437	547
FBgn0000357	1110	213	17079	13875	920	19582	6770	3123
FBgn0000358	830	397	9377	9584	671	7721	6580	1536
FBgn0000359	4720	289	12785	9626	1652	15272	7068	3977
FBgn0000360	9638	1180	28823	27543	3997	30084	13874	6181
FBgn0000370	808	332	1580	1661	664	1245	476	318
FBgn0000376	250	410	95	1	0	59	192	0
FBgn0000377	311	0	123	128	96	89	0	0
FBgn0000382	595	494	742	1546	199	828	534	42
FBgn0000384	230	83	127	373	70	87	0	1
FBgn0000392	1611	1916	156	395	56	63	0	0
FBgn0000394	121	0	29	132	0	8	0	1
FBgn0000395	209	115	977	1587	215	2161	910	0
FBgn0000404	1676	1749	123	195	0	25	2	0
FBgn0000405	3318	3319	272	4	23	116	2	2
FBgn0000409	755	314	302	44	20	199	0	113
FBgn0000412	980	863	292	42	53	66	0	0
FBgn0000413	365	287	449	298	78	350	142	155
FBgn0000414	224	306	54	1	1	102	0	78
FBgn0000416	2519	1244	8172	12968	3075	4277	1687	2809
FBgn0000422	0	0	7	1	0	62	0	0
FBgn0000426	163	148	24	0	0	0	1	0
FBgn0000427	17003	751	50111	94954	34791	18893	7110	13463
FBgn0000442	0	3	27	186	1	34	0	0
FBgn0000447	141	0	51	0	0	32	0	0
FBgn0000448	139	22	833	2218	680	129	118	119
FBgn0000451	0	0	0	192	1	0	0	28
FBgn0000454	479	484	6107	8930	790	6482	3705	1909
FBgn0000455	17	315	106	66	26	114	46	2
FBgn0000463	563	458	250	131	103	26	6	2
FBgn0000464	619	5	944	1243	384	299	287	213
FBgn0000479	300	658	156	450	269	356	469	77
FBgn0000482	97	320	119	192	114	83	94	109
FBgn0000489	64	1	667	1712	292	1025	602	0
FBgn0000490	14	1	137	596	256	12	1	0
FBgn0000497	138	100	6	209	2	3	61	3
FBgn0000499	87	0	76	15	18	39	197	0
FBgn0000504	54	2	146	314	22	262	1	6
FBgn0000520	71	74	1	319	30	89	0	0
FBgn0000524	290	320	333	719	13	111	0	2
FBgn0000527	13	0	15	9	1	18	0	0
FBgn0000533	20	0	0	0	1	22	0	0
FBgn0000535	13	121	0	176	36	72	49	15
FBgn0000536	101	1	77	0	40	40	0	0
FBgn0000541	933	1838	1054	1682	315	320	392	176
FBgn0000542	430	198	438	1350	213	133	294	101
FBgn0000543	60	0	125	428	47	148	29	1
FBgn0000546	628	10	2497	8118	955	1039	729	685
FBgn0000547	1485	1012	1376	2236	417	1287	2113	464
FBgn0000556	22046	20945	31288	29580	14125	10058	3163	3700
FBgn0000557	1	0	44	410	22	96	58	2
FBgn0000559	9319	8976	11833	15133	4904	4480	2343	1919
FBgn0000562	463	384	822	1851	436	391	325	160
FBgn0000565	134	49	61	1	21	1	0	0
FBgn0000566	382	244	84	2	40	30	0	2
FBgn0000567	898	385	2448	8225	819	1083	547	602
FBgn0000568	428	806	4092	11309	1912	2452	1549	1057
FBgn0000575	361	703	852	1498	131	537	122	279
FBgn0000578	604	548	1146	2666	246	511	707	145
FBgn0000579	1248	1138	1474	1375	744	986	283	393
FBgn0000581	1188	1431	556	599	250	714	426	138
FBgn0000588	46	0	5	0	0	23	0	0
FBgn0000611	527	115	350	307	214	146	133	57
FBgn0000615	522	887	16	1	2	0	1	0
FBgn0000617	38	0	56	0	21	9	0	0
FBgn0000618	0	0	10	91	0	0	0	0
FBgn0000629	113	1	102	0	51	108	98	0
FBgn0000633	62	126	17	314	18	20	279	21
FBgn0000635	551	290	1562	6423	489	905	976	229
FBgn0000636	417	727	3037	10511	942	10898	4849	2493
FBgn0000639	73	1211	0	0	1	0	1	0
FBgn0000644	1176	1	525	2309	192	311	464	143
FBgn0000658	11	0	7	0	25	0	0	0
FBgn0000659	18	85	0	0	0	0	0	1
FBgn0000662	116	169	220	460	106	107	165	1
FBgn0000667	980	334	1199	2774	701	650	349	233
FBgn0000709	290	289	313	852	198	240	86	114
FBgn0000711	151	109	212	687	58	308	496	130
FBgn0000719	399	479	402	910	201	1187	504	109
FBgn0000721	862	519	1941	3636	542	1116	341	655
FBgn0000723	106	437	540	2656	180	252	89	102
FBgn0000810	191	172	988	1239	286	243	361	251
FBgn0000826	112	0	0	0	0	27	0	0
FBgn0000927	850	853	108	0	2	1	0	1
FBgn0000928	6	2	37	0	0	0	0	0
FBgn0000964	447	142	1491	1525	1080	97	129	148
FBgn0000996	413	208	372	27	68	217	155	4
FBgn0001075	2	0	42	113	0	66	1	0
FBgn0001078	1336	1358	2134	6302	764	2346	812	757
FBgn0001079	81	0	170	270	19	205	0	2
FBgn0001083	0	1	4	8	6	103	2	54
FBgn0001084	181	0	84	151	0	1	93	0
FBgn0001085	194	19	150	1138	35	355	86	123
FBgn0001086	273	0	20	0	88	45	0	1
FBgn0001087	283	32	230	471	143	122	1	1
FBgn0001089	0	0	34	145	11	72	145	0
FBgn0001090	43	0	258	154	92	195	115	11
FBgn0001091	706	737	790	1388	185	377	131	1
FBgn0001092	798	914	620	1010	290	1333	273	353
FBgn0001098	807	954	1602	1234	530	126	103	204
FBgn0001099	4	0	0	0	0	25	125	0
FBgn0001104	592	177	299	1463	57	169	238	1
FBgn0001105	331	448	628	1101	538	396	143	203
FBgn0001108	393	743	359	630	160	307	0	1
FBgn0001114	0	0	24	0	0	0	0	112
FBgn0001120	869	573	15	1	8	1	1	0
FBgn0001122	115	314	257	458	69	21	1	114
FBgn0001123	48	0	158	441	61	63	90	1
FBgn0001124	133	804	313	0	25	52	0	50
FBgn0001125	526	929	246	224	60	171	0	1
FBgn0001128	379	321	471	680	166	486	286	0
FBgn0001133	84	76	51	125	0	86	0	0
FBgn0001134	9	0	0	1	0	7	0	0
FBgn0001137	15	0	34	143	1	0	0	0
FBgn0001138	25	0	1	322	2	2	3	0
FBgn0001139	370	334	252	506	65	193	1	0
FBgn0001142	111	130	194	811	21	20	1	1
FBgn0001145	155	1	87	336	1	125	60	66
FBgn0001149	663	1018	554	1269	94	476	209	125
FBgn0001150	0	0	0	10	0	43	0	0
FBgn0001168	315	2	384	1640	77	814	1730	301
FBgn0001169	519	331	225	693	147	26	0	104
FBgn0001179	171	0	34	200	0	75	31	1
FBgn0001180	147	1	69	0	1	23	0	0
FBgn0001185	59	0	28	191	0	0	0	0
FBgn0001186	648	659	973	1958	157	1176	520	413
FBgn0001187	86	0	1	414	0	52	0	0
FBgn0001189	54	1	102	210	1	81	113	126
FBgn0001197	453	813	239	526	54	94	0	0
FBgn0001202	96	0	53	170	19	26	36	96
FBgn0001206	98	0	36	221	37	39	1	0
FBgn0001208	14	0	1	0	13	21	0	0
FBgn0001215	857	760	619	782	131	242	0	54
FBgn0001218	2236	2520	8748	17959	5976	2467	1462	1630
FBgn0001220	1062	1046	522	604	186	356	102	1
FBgn0001222	701	264	337	522	144	146	0	0
FBgn0001223	31	293	182	1435	354	421	311	234
FBgn0001224	82	635	409	3813	296	259	413	906
FBgn0001225	1114	3399	1468	7187	687	1286	1935	428
FBgn0001226	1211	1796	1752	4748	451	579	1051	917
FBgn0001227	33	0	33	0	1	25	0	0
FBgn0001228	31	293	182	1435	354	421	311	234
FBgn0001229	52	0	168	5	65	8	134	83
FBgn0001230	992	451	2064	8282	1152	1468	4093	1216
FBgn0001233	8119	6644	7242	19294	1847	5087	4943	616
FBgn0001234	3346	4598	16268	45705	9283	26751	13019	9879
FBgn0001235	14	9	1	5	41	45	90	5
FBgn0001247	310	1	207	785	46	446	0	111
FBgn0001248	559	390	842	1311	399	220	83	2
FBgn0001250	25	0	166	8	35	151	0	6
FBgn0001253	9	0	0	0	37	46	1	3
FBgn0001257	166	5	1669	5028	537	1497	1093	728
FBgn0001258	1	198	0	99	0	333	35	144
FBgn0001259	0	0	0	34	0	113	117	0
FBgn0001263	298	32	140	94	18	47	0	0
FBgn0001269	2	126	16	306	1	82	311	2
FBgn0001276	0	0	29	0	1	29	115	0
FBgn0001280	63	80	53	43	0	0	0	0
FBgn0001291	102	145	179	189	0	122	208	67
FBgn0001296	595	20	1230	1422	577	328	133	313
FBgn0001297	555	916	4034	10587	808	4795	2939	942
FBgn0001301	253	477	228	803	87	232	197	1
FBgn0001308	974	643	735	1490	226	500	112	289
FBgn0001311	0	0	10	1	0	50	0	0
FBgn0001313	6	0	3	29	40	6	47	1
FBgn0001316	2948	1577	3303	6796	992	1940	890	443
FBgn0001321	0	0	20	34	0	16	72	0
FBgn0001324	190	537	286	213	138	66	240	110
FBgn0001330	108	73	77	172	0	12	0	1
FBgn0001332	493	652	421	58	0	239	117	1
FBgn0001341	706	226	49	142	18	5	0	0
FBgn0001404	130	287	288	1130	2	328	724	5
FBgn0001491	23	131	21	0	25	82	0	1
FBgn0001565	418	510	140	2	28	30	0	150
FBgn0001612	132	273	26	312	114	91	69	0
FBgn0001624	491	121	892	2549	442	639	447	1
FBgn0001941	93	170	415	1984	53	305	78	93
FBgn0001942	3039	2424	4000	5911	1365	1913	1207	605
FBgn0001961	313	291	437	459	131	156	248	394
FBgn0001965	137	446	311	463	143	148	0	0
FBgn0001970	138	0	56	403	129	0	0	73
FBgn0001974	131	83	38	0	0	0	0	0
FBgn0001977	98	0	85	364	34	105	0	0
FBgn0001978	428	1061	195	322	106	541	102	49
FBgn0001986	315	467	102	0	27	52	0	0
FBgn0001987	95	155	547	1278	194	534	117	411
FBgn0001989	65	248	62	0	0	0	0	0
FBgn0001990	107	117	24	166	28	0	0	0
FBgn0001991	11	0	9	1	1	93	0	1
FBgn0001992	0	0	26	1	23	30	0	0
FBgn0001994	360	877	511	647	325	196	387	72
FBgn0001995	76	1	51	68	0	0	0	0
FBgn0002021	19	0	71	415	0	0	0	0
FBgn0002022	88	0	145	1	94	0	0	7
FBgn0002023	2	2	0	7	3	14	2	0
FBgn0002031	480	125	159	2	56	212	1	0
FBgn0002036	0	0	4	292	0	8	0	0
FBgn0002044	384	1	476	423	130	300	293	119
FBgn0002069	610	86	305	626	207	639	230	3
FBgn0002121	638	141	1311	3269	455	680	251	377
FBgn0002174	214	1	197	0	37	68	0	2
FBgn0002183	921	521	366	55	46	81	22	0
FBgn0002283	55	200	55	0	57	1	139	0
FBgn0002284	248	134	247	446	42	122	0	0
FBgn0002306	0	114	35	155	0	44	144	1
FBgn0002354	32	0	18	178	0	0	0	0
FBgn0002413	1125	845	475	687	146	469	223	2
FBgn0002431	1606	396	989	737	495	340	84	179
FBgn0002441	470	185	648	906	67	510	156	110
FBgn0002466	125	137	16	0	44	14	0	1
FBgn0002521	178	301	282	493	66	112	0	60
FBgn0002524	124	302	156	6	46	17	0	137
FBgn0002525	436	87	203	244	32	286	0	2
FBgn0002526	2400	1302	4651	6884	2413	650	179	786
FBgn0002542	459	543	65	0	0	8	0	0
FBgn0002543	292	208	93	2	52	59	0	1
FBgn0002552	100	2	138	354	87	94	1	0
FBgn0002562	17	241	0	0	0	0	1	0
FBgn0002563	16	451	0	96	0	0	0	0
FBgn0002564	14	184	3	0	1	0	0	0
FBgn0002565	11	572	0	1	0	0	1	0
FBgn0002566	126	128	57	615	18	92	3	0
FBgn0002567	277	633	592	1026	158	342	148	157
FBgn0002577	90	0	38	133	26	34	165	1
FBgn0002579	1964	347	2028	1572	418	699	4	79
FBgn0002590	3505	1711	4671	5708	1635	1372	332	403
FBgn0002592	0	128	6	0	0	5	0	0
FBgn0002593	1827	1434	2572	4863	1345	890	224	469
FBgn0002607	3165	2440	3099	4559	1201	1347	170	501
FBgn0002609	154	1	8	1	0	1	0	0
FBgn0002622	2134	2256	3150	3592	1587	771	689	562
FBgn0002626	1332	866	1912	1618	934	508	1783	374
FBgn0002638	897	600	267	149	60	82	3	2
FBgn0002641	15	155	36	475	45	73	4	0
FBgn0002643	733	748	1750	2536	736	2181	1434	546
FBgn0002645	538	444	1054	2312	378	704	269	477
FBgn0002673	160	207	3	166	0	20	0	1
FBgn0002707	51	0	59	0	0	6	0	16
FBgn0002709	302	0	0	7	4	83	82	0
FBgn0002715	47	124	9	574	0	0	1	0
FBgn0002716	96	136	88	72	88	54	0	0
FBgn0002719	394	151	1154	2410	201	2090	1301	715
FBgn0002723	28	0	67	230	45	76	0	0
FBgn0002733	46	1	415	847	63	50	2	0
FBgn0002736	126	115	124	158	0	24	0	0
FBgn0002772	8	139	0	1	0	42	0	0
FBgn0002773	178	0	32	375	0	68	4	0
FBgn0002774	148	381	178	173	33	116	89	0
FBgn0002775	122	0	90	209	0	58	39	0
FBgn0002778	242	253	196	182	103	79	1	1
FBgn0002780	2300	1354	621	608	241	185	239	0
FBgn0002781	1018	821	434	583	193	401	3	35
FBgn0002783	573	582	286	155	49	114	2	1
FBgn0002787	302	116	478	442	372	221	188	4
FBgn0002789	19	0	6	0	0	0	0	0
FBgn0002791	181	0	69	176	67	47	0	0
FBgn0002842	0	0	35	321	31	0	0	0
FBgn0002868	277	587	501	955	32	1183	786	227
FBgn0002872	157	75	47	0	0	0	0	0
FBgn0002873	701	1170	20	0	2	1	0	0
FBgn0002878	360	375	28	175	1	0	0	0
FBgn0002887	39	158	202	466	3	191	3	8
FBgn0002891	54	296	124	231	47	148	0	123
FBgn0002899	33	0	2	267	0	15	0	0
FBgn0002901	21	156	14	0	0	6	0	0
FBgn0002905	330	453	24	208	55	100	0	140
FBgn0002906	65	129	67	366	29	9	0	0
FBgn0002909	61	11	51	163	0	27	0	0
FBgn0002914	245	278	203	230	37	65	1	2
FBgn0002921	1143	1207	3588	4309	1394	2420	1643	910
FBgn0002924	192	404	56	367	0	55	0	0
FBgn0002926	917	186	9555	16644	8294	1118	584	984
FBgn0002930	9	0	0	0	0	37	0	0
FBgn0002931	0	0	53	0	0	7	88	0
FBgn0002932	147	110	233	1485	60	129	243	2
FBgn0002936	13	0	56	0	0	22	128	1
FBgn0002938	0	0	34	158	0	1	0	1
FBgn0002941	0	0	0	333	0	18	1	0
FBgn0002945	169	508	731	2985	290	371	163	89
FBgn0002948	138	254	0	0	1	23	0	0
FBgn0002962	511	128	78	0	0	2	0	1
FBgn0002973	247	226	458	1482	106	230	0	2
FBgn0002985	3	0	3	50	0	20	0	0
FBgn0002989	139	164	0	0	0	0	0	0
FBgn0003002	13	102	2	156	40	24	139	5
FBgn0003008	51	0	51	167	9	0	0	0
FBgn0003009	66	0	0	0	0	10	0	0
FBgn0003015	1819	1488	92	0	2	83	0	5
FBgn0003016	802	423	2103	3518	489	728	319	566
FBgn0003023	924	1667	123	243	19	237	3	137
FBgn0003028	931	842	149	116	22	131	4	7
FBgn0003041	203	183	44	36	1	5	113	2
FBgn0003042	100	3	108	239	0	66	1	0
FBgn0003044	250	150	201	219	36	13	0	0
FBgn0003048	537	148	838	1169	190	711	438	209
FBgn0003053	668	289	2350	3596	731	1616	1319	515
FBgn0003062	2783	972	813	330	176	114	5	0
FBgn0003067	34	0	97	335	33	68	116	0
FBgn0003068	88	0	228	692	48	434	127	1
FBgn0003071	183	472	243	289	56	272	80	1
FBgn0003074	502	435	291	389	108	250	1	0
FBgn0003076	358	147	183	416	27	18	0	0
FBgn0003079	167	225	192	1357	47	151	1	163
FBgn0003089	34	0	453	784	159	92	1	0
FBgn0003090	81	146	90	401	20	86	196	229
FBgn0003091	0	3	122	390	0	478	1012	3
FBgn0003093	248	1	211	180	111	322	91	57
FBgn0003116	154	0	0	0	0	11	112	0
FBgn0003118	99	2	484	872	7	304	173	140
FBgn0003124	467	766	29	0	0	77	0	0
FBgn0003129	10	5	43	446	3	3	40	12
FBgn0003130	0	0	0	45	1	8	0	0
FBgn0003134	213	108	231	220	1	102	147	4
FBgn0003137	146	0	273	0	0	285	0	1
FBgn0003139	184	330	106	0	0	56	0	2
FBgn0003141	211	116	164	1	151	103	3	0
FBgn0003149	665	1	126	1130	45	654	929	58
FBgn0003159	1510	233	1091	2413	207	1497	1078	262
FBgn0003162	47	0	188	21	0	99	114	0
FBgn0003165	1969	1694	2530	5502	864	1486	1197	698
FBgn0003169	146	118	164	455	65	81	106	1
FBgn0003174	123	0	231	595	32	836	281	0
FBgn0003175	526	1256	1900	5522	416	834	217	351
FBgn0003187	141	154	46	1	0	37	62	122
FBgn0003189	1040	701	374	667	120	161	2	1
FBgn0003204	654	471	216	342	85	107	2	50
FBgn0003205	213	0	189	608	91	170	0	0
FBgn0003206	19	0	115	4	48	58	0	0
FBgn0003209	310	293	411	1375	36	950	1141	78
FBgn0003210	121	0	264	0	65	112	0	178
FBgn0003218	266	156	495	2042	189	347	190	181
FBgn0003227	148	1	22	0	0	42	1	0
FBgn0003231	253	1129	793	3349	193	860	784	6
FBgn0003250	4	3	63	94	102	82	0	3
FBgn0003254	0	0	0	42	1	23	11	0
FBgn0003255	0	0	0	0	2	63	42	0
FBgn0003256	220	172	1186	1367	523	512	893	164
FBgn0003257	243	285	213	398	37	43	85	0
FBgn0003261	3489	2621	2565	5234	765	2547	785	368
FBgn0003268	140	103	71	530	1	30	0	1
FBgn0003274	2820	2069	3197	4495	1501	1139	305	280
FBgn0003275	93	0	31	0	30	0	0	0
FBgn0003277	1585	1686	622	1960	183	624	31	571
FBgn0003278	156	295	85	0	11	8	0	1
FBgn0003279	5388	5976	7094	11904	3627	1806	662	1022
FBgn0003285	127	12	22	13	21	78	14	16
FBgn0003295	15	0	4	242	1	65	12	0
FBgn0003301	10	273	281	123	40	1229	358	178
FBgn0003308	0	71	38	234	0	0	1	0
FBgn0003310	575	125	403	2347	18	369	363	225
FBgn0003312	12	0	51	295	64	47	0	0
FBgn0003317	248	96	174	622	23	112	172	56
FBgn0003321	257	1	332	501	168	328	370	272
FBgn0003326	22	3	2	312	4	44	69	3
FBgn0003328	561	209	2457	6726	533	3558	2845	457
FBgn0003330	10	0	22	0	0	26	0	0
FBgn0003334	195	107	185	309	121	81	40	0
FBgn0003345	260	280	1246	3895	422	903	1339	271
FBgn0003346	255	390	181	151	75	54	0	153
FBgn0003353	93	104	28	276	39	1	0	0
FBgn0003357	13	162	0	0	1	0	0	0
FBgn0003358	0	75	0	0	0	29	0	0
FBgn0003360	2216	2897	3471	2946	1585	773	180	334
FBgn0003366	145	0	537	623	7	195	167	105
FBgn0003371	1131	802	2001	7517	534	2180	1037	484
FBgn0003380	18	143	16	512	34	216	131	258
FBgn0003382	1	2	0	0	30	0	13	0
FBgn0003386	34	1	28	157	62	1	78	0
FBgn0003388	1	0	81	1	117	91	0	0
FBgn0003390	16	304	65	64	1	66	0	0
FBgn0003391	886	520	1923	2809	645	2075	835	940
FBgn0003392	334	535	502	1201	112	228	181	94
FBgn0003396	486	561	1277	3833	322	1298	913	441
FBgn0003401	71	158	38	281	0	3	0	0
FBgn0003410	106	601	198	376	48	48	313	0
FBgn0003411	10	0	86	222	0	105	1	0
FBgn0003415	689	1583	807	2007	232	366	324	61
FBgn0003416	296	0	142	178	33	31	0	0
FBgn0003423	433	503	450	1256	102	261	128	64
FBgn0003429	35	91	5	666	52	83	69	288
FBgn0003435	1049	373	4119	8763	1279	2841	1904	982
FBgn0003444	116	51	44	0	12	19	0	0
FBgn0003447	211	359	278	665	116	188	2	2
FBgn0003449	58	84	101	0	0	41	0	0
FBgn0003459	453	0	62	0	80	42	55	108
FBgn0003460	20	2	2	0	0	1	142	1
FBgn0003462	330	1	256	235	209	114	0	0
FBgn0003463	215	107	174	464	120	741	218	82
FBgn0003464	361	490	242	214	12	2	0	0
FBgn0003475	306	236	625	987	128	481	192	13
FBgn0003479	54	0	13	0	14	0	1	0
FBgn0003480	35	0	17	0	0	0	0	147
FBgn0003483	234	312	189	289	31	2	3	1
FBgn0003486	8	0	153	130	139	0	0	0
FBgn0003495	73	0	26	1	9	289	171	1
FBgn0003499	9	6	2	64	27	25	7	18
FBgn0003502	446	23	1483	2989	397	1064	373	312
FBgn0003507	138	143	984	908	263	1115	646	178
FBgn0003512	71	88	80	287	0	0	0	0
FBgn0003513	0	0	6	0	0	29	2	0
FBgn0003514	339	484	883	2610	346	645	199	357
FBgn0003515	37	0	0	0	0	56	0	0
FBgn0003517	9433	3736	8283	3504	2470	1321	248	661
FBgn0003520	225	435	200	754	80	76	244	128
FBgn0003525	266	90	79	188	31	1	84	1
FBgn0003527	52	0	13	0	0	1	0	0
FBgn0003545	15	0	19	0	12	0	0	0
FBgn0003557	615	802	818	1024	200	550	613	157
FBgn0003559	34	206	88	182	34	73	112	1
FBgn0003567	225	452	274	524	124	78	48	0
FBgn0003575	162	319	497	297	58	522	283	261
FBgn0003598	494	371	149	2	33	21	151	0
FBgn0003607	689	418	179	171	25	40	0	0
FBgn0003612	495	275	200	866	35	39	135	2
FBgn0003638	716	566	574	143	110	213	1	61
FBgn0003651	0	1	0	196	0	41	1	0
FBgn0003654	99	2	382	586	37	117	0	0
FBgn0003655	568	1257	2	179	1	37	0	1
FBgn0003656	442	544	794	1123	394	1181	592	86
FBgn0003660	122	257	279	1227	11	202	48	22
FBgn0003676	1264	748	739	1230	68	108	112	1
FBgn0003687	76	143	46	148	31	0	0	0
FBgn0003701	200	134	0	0	0	1	0	0
FBgn0003710	34	0	0	0	0	7	10	0
FBgn0003714	88	0	31	171	0	5	0	0
FBgn0003716	366	285	619	1370	379	286	642	276
FBgn0003721	1516	1008	2590	7548	891	1162	812	198
FBgn0003731	1154	366	2114	7575	1011	2043	534	357
FBgn0003732	1203	2745	557	751	261	72	149	82
FBgn0003733	222	0	5	0	1	7	1	0
FBgn0003741	6	0	37	109	52	22	0	0
FBgn0003742	33	1	29	62	18	1	0	0
FBgn0003744	248	33	240	523	49	202	162	0
FBgn0003747	0	87	0	0	0	34	0	0
FBgn0003748	773	316	833	1116	172	1898	1211	436
FBgn0003862	775	1287	687	2390	237	634	172	204
FBgn0003866	48	0	23	0	0	48	0	3
FBgn0003867	38	0	35	272	0	14	0	0
FBgn0003870	1465	618	4025	9164	1703	2033	1432	1451
FBgn0003882	84	142	150	0	0	40	202	0
FBgn0003884	2699	1513	4171	6096	1349	1321	861	416
FBgn0003885	379	177	233	214	50	157	0	0
FBgn0003887	2079	2696	2331	2661	1267	356	5	318
FBgn0003888	920	333	2638	4479	1424	2075	435	290
FBgn0003890	164	49	588	2089	135	122	229	2
FBgn0003891	772	1245	1174	2218	554	628	1135	458
FBgn0003892	171	98	30	0	49	0	119	2
FBgn0003896	15	2	1	0	57	9	14	41
FBgn0003900	122	0	11	0	1	38	32	0
FBgn0003930	1	0	8	0	0	44	0	1
FBgn0003941	1596	1496	1987	1872	559	357	264	2
FBgn0003942	1688	1757	1924	2117	1123	743	686	2
FBgn0003943	477	388	1646	2401	349	1639	288	780
FBgn0003944	11	7	8	424	1	2	2	4
FBgn0003950	50	2	0	0	0	12	75	0
FBgn0003963	980	438	4364	7670	987	2417	3065	1192
FBgn0003964	450	128	251	587	119	150	137	0
FBgn0003969	205	135	182	343	73	175	156	216
FBgn0003975	0	0	0	271	3	31	0	1
FBgn0003977	241	560	274	260	82	73	0	2
FBgn0003978	106	0	9	1	0	0	0	0
FBgn0003979	15340	354	33009	51505	19939	6285	3897	8586
FBgn0003980	4133	487	32367	26746	12779	3322	369	4469
FBgn0003983	17721	489	26495	35665	10402	5342	2714	7004
FBgn0003984	20	180	178	1039	95	598	179	8
FBgn0003996	218	0	1365	2821	495	661	425	836
FBgn0003997	73	201	391	973	35	498	218	1
FBgn0004003	52	0	214	184	175	0	96	0
FBgn0004028	73	1	11	1	3	28	120	2
FBgn0004045	6260	629	31783	45899	32358	6157	451	7475
FBgn0004047	1811	1207	10172	20068	11199	1891	166	3112
FBgn0004049	333	365	180	617	0	134	1	157
FBgn0004050	236	4	112	457	50	7	144	1
FBgn0004055	53	125	35	166	1	35	2	0
FBgn0004057	104	128	141	217	1	123	0	0
FBgn0004066	170	79	239	27	15	47	0	0
FBgn0004087	10	0	38	5	0	16	0	0
FBgn0004101	217	331	105	606	41	155	4	98
FBgn0004103	622	538	702	908	325	335	460	158
FBgn0004106	105	0	35	358	0	2	0	0
FBgn0004107	158	82	14	0	0	39	0	0
FBgn0004108	98	1	129	341	35	63	0	0
FBgn0004117	169	0	0	381	1	67	0	1
FBgn0004132	11	14	88	292	62	90	2	58
FBgn0004133	183	10	860	1670	221	706	849	136
FBgn0004167	2278	1225	2120	2217	511	1947	877	725
FBgn0004168	0	2	0	0	7	19	0	1
FBgn0004169	533	3	3	1	78	93	1	2
FBgn0004177	579	896	656	1535	380	369	285	342
FBgn0004179	146	315	170	353	45	37	0	158
FBgn0004197	2	2	3	95	0	21	3	1
FBgn0004198	578	181	981	3308	344	352	664	193
FBgn0004227	258	196	486	530	261	19	105	1
FBgn0004237	1401	708	1204	1410	308	237	82	78
FBgn0004242	0	0	14	103	6	14	9	2
FBgn0004244	23	6	21	1	4	11	2	3
FBgn0004359	372	3	343	854	92	225	1	142
FBgn0004360	10	157	22	538	0	2	0	1
FBgn0004362	1164	238	258	188	152	70	1	2
FBgn0004363	836	2005	925	930	462	209	189	201
FBgn0004364	335	2	1304	3297	697	428	326	3
FBgn0004367	220	271	35	1	31	14	108	0
FBgn0004368	673	266	590	1689	264	501	244	302
FBgn0004369	319	241	568	1308	254	472	123	151
FBgn0004370	682	201	1370	4480	364	1257	508	233
FBgn0004373	258	346	1189	1468	436	1156	483	242
FBgn0004374	617	277	296	685	177	758	270	293
FBgn0004378	87	134	40	0	0	0	0	0
FBgn0004379	157	267	16	0	22	0	0	1
FBgn0004380	44	0	24	133	0	46	0	0
FBgn0004381	104	151	74	210	13	37	46	0
FBgn0004387	213	484	290	1766	149	235	118	428
FBgn0004390	510	674	392	986	214	454	256	4
FBgn0004391	337	250	215	258	58	1	1	1
FBgn0004394	1	2	1	0	40	1	144	10
FBgn0004395	167	319	103	483	91	517	197	136
FBgn0004396	289	8	1327	3496	916	394	431	35
FBgn0004397	536	400	1278	2852	189	705	615	324
FBgn0004400	82	0	26	0	54	37	0	0
FBgn0004401	1195	1341	1152	2142	395	304	96	213
FBgn0004403	999	700	749	884	735	429	266	305
FBgn0004404	534	272	377	228	161	199	91	118
FBgn0004406	75	0	30	642	0	42	129	0
FBgn0004407	66	138	54	95	0	25	0	0
FBgn0004414	43	0	13	1	0	0	0	0
FBgn0004419	2030	2971	379	639	83	119	0	0
FBgn0004432	1281	1805	1072	1495	220	365	2	4
FBgn0004435	305	335	326	889	143	193	4	1
FBgn0004436	100	234	175	688	11	177	238	42
FBgn0004449	624	148	966	2696	361	1388	411	169
FBgn0004456	491	1177	1440	3593	473	651	366	462
FBgn0004462	240	439	267	984	200	438	497	106
FBgn0004463	295	114	66	0	0	8	0	0
FBgn0004465	121	108	112	216	31	38	0	0
FBgn0004507	860	1016	445	378	61	189	92	127
FBgn0004509	547	1154	2347	9526	767	3439	2643	1104
FBgn0004510	86	98	59	0	34	35	1	0
FBgn0004512	0	0	6	0	0	333	1	1
FBgn0004513	17	0	30	562	30	75	0	0
FBgn0004514	0	1	15	2	1	21	0	87
FBgn0004556	49	187	36	0	0	14	0	0
FBgn0004569	104	0	137	419	21	371	163	214
FBgn0004573	0	1	1	421	0	95	0	0
FBgn0004574	119	71	119	3	79	98	115	50
FBgn0004575	2	0	25	237	81	157	88	56
FBgn0004577	31	16	32	182	1	24	2	51
FBgn0004581	324	172	67	116	1	22	0	0
FBgn0004583	470	232	482	1984	149	580	625	0
FBgn0004584	94	28	52	0	0	54	138	1
FBgn0004587	412	209	565	1388	367	27	271	5
FBgn0004595	79	140	9	5	4	1	6	85
FBgn0004597	65	0	18	0	0	0	0	0
FBgn0004598	580	398	1597	2723	270	643	467	1
FBgn0004606	174	181	50	144	36	4	19	17
FBgn0004607	16	487	39	317	0	79	113	158
FBgn0004611	293	204	664	2019	75	693	564	1
FBgn0004618	0	8	0	732	0	0	0	1
FBgn0004622	0	0	1	253	0	21	0	1
FBgn0004629	4	0	88	277	41	221	296	1
FBgn0004635	70	0	202	767	6	384	0	1
FBgn0004636	289	273	339	1071	142	410	41	238
FBgn0004638	137	229	278	1500	144	416	159	227
FBgn0004643	373	0	195	0	0	116	0	0
FBgn0004644	60	1	16	282	1	27	0	1
FBgn0004646	365	117	1137	658	762	478	56	400
FBgn0004647	1419	647	1380	1516	504	831	301	176
FBgn0004648	434	308	726	1021	174	276	228	1
FBgn0004649	5704	5803	613	6	5	218	11	1
FBgn0004650	1021	485	99	0	1	34	0	2
FBgn0004652	230	634	210	333	35	398	548	91
FBgn0004654	727	346	387	949	132	413	122	135
FBgn0004655	909	288	560	530	228	331	0	2
FBgn0004656	1323	1897	1758	4142	402	1177	689	244
FBgn0004657	718	466	2411	3712	1072	2463	1713	1060
FBgn0004666	268	73	828	1671	166	1205	1154	472
FBgn0004687	335	165	825	1931	457	842	286	449
FBgn0004698	459	1	191	0	0	260	75	109
FBgn0004795	486	411	53	370	24	1	91	186
FBgn0004797	220	298	36	0	59	185	1	1
FBgn0004811	112	0	6	0	6	19	0	0
FBgn0004828	1264	1908	1240	1896	594	1267	617	878
FBgn0004832	33	185	20	0	0	0	0	0
FBgn0004837	53	0	8	204	0	3	0	2
FBgn0004838	2408	3613	2115	3716	1225	1260	562	360
FBgn0004839	59	1	1	1	0	30	0	2
FBgn0004842	1	108	37	305	5	32	2	5
FBgn0004852	64	204	537	3787	75	507	267	160
FBgn0004855	49	128	28	0	0	19	0	0
FBgn0004856	583	486	312	287	70	96	176	120
FBgn0004858	240	1	744	544	161	2233	383	110
FBgn0004859	39	276	200	493	19	100	6	1
FBgn0004860	182	36	140	205	3	79	77	58
FBgn0004861	60	93	137	37	0	56	0	1
FBgn0004864	395	545	333	556	172	443	113	51
FBgn0004865	7	4	320	2404	65	249	242	26
FBgn0004867	2806	2554	3536	4380	1564	462	158	437
FBgn0004868	466	536	864	2335	588	695	195	784
FBgn0004870	21	1	53	66	3	67	9	2
FBgn0004872	611	525	91	147	0	27	0	2
FBgn0004875	856	453	504	666	112	157	182	207
FBgn0004876	357	1121	900	1828	528	1150	460	176
FBgn0004878	13	29	0	8	1	9	0	0
FBgn0004882	1189	1332	131	332	2	51	183	3
FBgn0004885	45	33	211	871	91	527	634	12
FBgn0004888	500	505	345	345	136	85	0	101
FBgn0004889	394	764	247	764	87	229	260	121
FBgn0004893	77	137	448	930	120	112	158	0
FBgn0004901	98	154	63	0	1	0	0	0
FBgn0004903	206	107	192	1	13	119	123	1
FBgn0004907	772	813	1201	2991	667	1272	817	549
FBgn0004908	0	0	21	0	31	12	0	0
FBgn0004910	1	0	13	4	0	1	8	3
FBgn0004913	379	331	57	235	0	55	0	1
FBgn0004914	283	361	575	961	138	538	274	310
FBgn0004915	52	7	41	195	25	14	30	0
FBgn0004919	0	1	40	1	2	78	0	0
FBgn0004921	241	577	312	1107	140	219	0	0
FBgn0004924	1829	1324	897	2877	483	338	431	150
FBgn0004926	1232	398	645	258	305	171	170	1
FBgn0004957	86	0	4	86	0	21	0	1
FBgn0004959	77	0	77	0	42	14	0	0
FBgn0005198	399	139	149	393	100	203	0	0
FBgn0005278	1845	1103	3160	2058	659	415	300	121
FBgn0005322	125	0	63	0	43	67	128	107
FBgn0005355	108	0	142	120	40	61	0	0
FBgn0005386	183	354	335	1027	76	242	170	110
FBgn0005390	829	696	63	1	0	25	1	0
FBgn0005391	6618	615	36745	53052	31577	5922	1015	5117
FBgn0005411	331	439	181	365	68	189	127	1
FBgn0005427	121	59	283	259	80	221	153	1
FBgn0005533	2185	1270	2862	4029	870	841	280	268
FBgn0005536	704	407	471	1102	157	497	5	159
FBgn0005558	0	0	1	0	2	17	77	0
FBgn0005564	27	0	6	446	1	1	87	170
FBgn0005585	2413	740	4096	4646	2123	602	349	714
FBgn0005586	1	0	39	12	1	15	0	0
FBgn0005592	0	2	48	0	2	46	1	148
FBgn0005593	2988	2756	3626	4641	1678	1188	699	242
FBgn0005596	327	333	104	75	23	102	0	66
FBgn0005612	396	2	1449	3093	306	1823	659	665
FBgn0005613	0	2	45	1036	0	1	0	0
FBgn0005616	17	1	24	0	46	30	117	4
FBgn0005617	480	132	126	327	14	121	0	0
FBgn0005619	11	0	32	377	1	11	0	99
FBgn0005624	270	590	491	617	80	203	166	5
FBgn0005630	3586	3846	3623	8833	914	2192	1540	411
FBgn0005631	80	0	119	0	0	305	117	0
FBgn0005632	1020	1117	1267	1489	305	736	253	153
FBgn0005638	54	0	285	424	98	24	0	0
FBgn0005640	522	596	1175	4326	470	584	246	382
FBgn0005642	159	406	89	220	47	85	61	1
FBgn0005648	346	62	66	658	47	125	37	1
FBgn0005649	662	576	678	1371	18	349	664	232
FBgn0005654	248	0	457	651	252	35	0	258
FBgn0005655	468	342	156	1	51	38	0	0
FBgn0005660	46	611	117	827	1	248	605	0
FBgn0005664	0	0	8	184	1	0	107	0
FBgn0005666	583	142	233	502	111	362	959	59
FBgn0005670	9	1	27	1	0	21	0	1
FBgn0005671	1435	1140	1773	2900	637	788	757	897
FBgn0005672	306	169	136	427	73	92	245	0
FBgn0005674	682	1578	751	1435	328	327	92	80
FBgn0005677	0	111	0	661	2	16	16	4
FBgn0005683	15	0	23	0	0	28	0	1
FBgn0005694	170	127	200	1	1	66	0	0
FBgn0005695	374	376	173	7	63	94	87	7
FBgn0005696	54	157	38	0	0	1	153	0
FBgn0005771	151	45	166	888	2	296	1	53
FBgn0005775	46	18	37	15	24	167	268	10
FBgn0005777	166	292	44	275	32	22	1	0
FBgn0008635	494	460	1092	912	647	58	2	272
FBgn0008646	0	0	3	36	1	1	9	0
FBgn0010014	16	0	0	0	0	22	0	0
FBgn0010015	0	0	33	3	0	0	83	0
FBgn0010019	0	0	60	1	2	89	0	1
FBgn0010038	0	145	38	809	0	137	0	0
FBgn0010039	0	0	99	264	4	92	0	143
FBgn0010040	0	0	51	306	38	22	0	0
FBgn0010041	0	143	22	0	0	0	0	1
FBgn0010043	0	0	17	179	0	2	0	0
FBgn0010051	660	782	1341	1579	332	1081	572	240
FBgn0010052	0	0	0	353	0	59	0	1
FBgn0010053	93	1	58	152	13	94	0	0
FBgn0010078	2579	1230	2825	3006	867	911	104	166
FBgn0010097	156	231	2	0	0	0	1	0
FBgn0010100	1309	941	820	481	270	106	1	1
FBgn0010105	0	0	55	4	0	0	0	32
FBgn0010113	1007	1627	1197	5523	358	3387	2580	726
FBgn0010114	1	78	1	339	8	3	5	12
FBgn0010173	217	316	76	2	0	263	0	0
FBgn0010194	56	0	89	0	0	0	0	0
FBgn0010197	1	0	32	188	31	6	0	1
FBgn0010198	1295	1152	1611	847	488	394	1	165
FBgn0010213	256	213	72	1	0	25	0	0
FBgn0010215	279	126	516	1447	255	270	136	2
FBgn0010217	1570	1797	1853	1013	679	388	267	174
FBgn0010220	187	0	38	1	0	1	0	0
FBgn0010222	249	735	442	2158	61	713	504	131
FBgn0010223	40	2	83	172	0	180	1	2
FBgn0010225	159	0	85	218	41	110	3	1
FBgn0010226	279	126	324	727	84	76	0	0
FBgn0010228	250	261	476	1579	179	141	125	308
FBgn0010235	102	170	104	905	43	93	0	105
FBgn0010238	301	2	946	2301	222	1786	581	473
FBgn0010240	0	0	12	9	0	0	107	1
FBgn0010241	0	97	0	291	0	41	1	0
FBgn0010246	208	151	644	1019	246	738	442	234
FBgn0010247	1067	346	1815	4086	842	752	408	71
FBgn0010265	1852	2220	2585	1717	621	934	822	185
FBgn0010269	266	105	71	291	43	34	0	58
FBgn0010278	684	8	249	0	27	166	160	0
FBgn0010280	515	420	508	345	84	158	115	1
FBgn0010282	519	106	405	402	166	98	32	0
FBgn0010287	54	148	12	0	1	0	0	0
FBgn0010288	217	106	166	0	27	37	286	134
FBgn0010292	244	140	59	0	0	20	0	0
FBgn0010300	841	1055	625	748	586	368	34	170
FBgn0010303	236	266	447	413	131	167	97	0
FBgn0010309	111	602	0	0	1	0	0	0
FBgn0010313	260	821	1003	1059	337	1641	693	446
FBgn0010314	156	0	17	0	0	24	0	0
FBgn0010315	136	134	96	0	57	5	0	0
FBgn0010316	108	76	44	134	31	166	0	0
FBgn0010323	1	1	1	152	0	11	0	0
FBgn0010328	1911	1325	704	478	72	178	126	3
FBgn0010329	4	2	15	177	35	63	99	27
FBgn0010333	178	0	377	478	147	183	1	146
FBgn0010339	228	1	86	265	77	99	0	0
FBgn0010340	98	0	76	0	0	1	0	0
FBgn0010341	227	537	370	762	112	299	224	1
FBgn0010342	70	529	128	192	2	22	1	0
FBgn0010348	947	1218	1888	2391	950	685	250	405
FBgn0010350	213	459	166	59	94	30	4	127
FBgn0010352	723	396	665	1638	199	281	579	138
FBgn0010355	616	505	351	1	86	72	94	124
FBgn0010356	85	0	30	0	36	74	74	0
FBgn0010357	53	683	0	1	0	0	0	0
FBgn0010379	335	217	408	1433	65	161	0	110
FBgn0010380	474	98	568	700	211	163	272	281
FBgn0010382	250	770	183	906	152	58	118	1
FBgn0010383	182	0	757	1037	128	416	155	366
FBgn0010387	0	0	14	2	0	0	0	138
FBgn0010389	43	1	0	89	0	0	1	0
FBgn0010391	496	195	680	1751	186	150	66	108
FBgn0010395	29	363	59	118	0	59	0	0
FBgn0010397	235	263	638	1239	153	706	488	483
FBgn0010398	8	0	80	0	0	22	0	0
FBgn0010399	59	168	83	0	3	294	0	106
FBgn0010406	248	0	299	565	175	156	0	297
FBgn0010407	0	0	0	97	0	14	0	0
FBgn0010408	1572	1869	2051	3285	918	708	115	504
FBgn0010409	2747	1872	2973	3596	1138	1023	11	369
FBgn0010411	1389	1662	2060	3327	1048	659	320	990
FBgn0010412	4250	1578	4570	2103	1192	1764	203	240
FBgn0010414	23	1	14	0	18	2	0	0
FBgn0010415	920	228	2912	7031	867	1469	939	297
FBgn0010416	58	0	140	1	45	61	0	1
FBgn0010417	38	0	54	2	35	50	185	1
FBgn0010421	56	0	46	0	0	0	0	0
FBgn0010422	226	0	62	0	13	77	45	0
FBgn0010431	333	301	20	0	0	26	0	0
FBgn0010434	569	362	1791	3795	388	2094	1763	888
FBgn0010435	292	1	961	2116	230	829	182	311
FBgn0010438	50	97	56	1	34	1	0	1
FBgn0010441	28	213	67	1	11	10	0	0
FBgn0010452	11	0	107	542	5	39	0	67
FBgn0010453	9	0	1	0	0	2	90	3
FBgn0010470	454	391	501	877	146	66	31	128
FBgn0010473	149	239	38	229	51	98	77	2
FBgn0010482	11	40	20	0	30	28	1	0
FBgn0010488	3278	3893	2969	6940	887	1681	1661	686
FBgn0010497	64	0	49	218	13	1	0	0
FBgn0010501	169	317	82	23	0	47	0	0
FBgn0010504	85	17	196	218	54	67	139	47
FBgn0010516	262	316	300	280	155	182	84	63
FBgn0010520	27	0	18	0	0	0	0	0
FBgn0010531	61	0	9	0	0	0	0	1
FBgn0010548	192	423	144	346	86	331	118	77
FBgn0010551	388	386	364	1	56	143	1	0
FBgn0010575	1508	1343	2009	2834	832	893	319	233
FBgn0010583	326	284	162	833	55	106	107	159
FBgn0010590	88	300	82	221	76	54	1	0
FBgn0010591	125	1	363	431	84	327	225	0
FBgn0010602	763	178	372	192	85	171	1	0
FBgn0010607	147	112	23	245	1	10	208	1
FBgn0010611	186	0	612	710	213	293	2	0
FBgn0010612	110	0	171	266	113	6	0	0
FBgn0010620	124	214	435	997	89	965	138	251
FBgn0010621	1394	876	658	1071	441	60	146	0
FBgn0010622	153	0	37	0	24	0	0	0
FBgn0010638	183	2	813	825	324	38	0	1
FBgn0010651	37	0	121	422	0	93	0	0
FBgn0010660	443	826	294	0	327	66	570	134
FBgn0010741	184	0	134	0	39	64	0	0
FBgn0010747	242	180	348	0	173	118	1	157
FBgn0010750	214	251	172	223	110	58	67	3
FBgn0010762	348	742	484	924	254	344	8	2
FBgn0010768	149	0	119	169	130	60	1	21
FBgn0010770	266	0	92	202	35	0	0	0
FBgn0010772	151	193	156	135	175	249	113	0
FBgn0010774	554	252	271	530	181	336	28	0
FBgn0010786	671	333	129	451	245	121	537	0
FBgn0010803	210	0	73	220	45	154	0	0
FBgn0010808	178	138	171	2	80	64	0	25
FBgn0010812	122	8	244	375	119	109	128	0
FBgn0010825	917	1277	1396	1242	502	829	653	276
FBgn0010830	111	0	54	1	0	43	0	0
FBgn0010877	327	169	474	786	187	1093	596	383
FBgn0010894	5	158	109	147	0	62	0	164
FBgn0010905	1273	968	2829	4181	1266	1304	443	440
FBgn0010909	1396	919	2306	3861	735	2753	2110	470
FBgn0010926	332	280	94	0	108	81	1	0
FBgn0011016	190	148	784	1288	526	53	323	84
FBgn0011020	116	51	65	1	19	0	0	2
FBgn0011202	464	0	489	939	250	722	587	383
FBgn0011204	580	610	428	712	126	167	13	1
FBgn0011205	160	177	214	185	129	833	140	303
FBgn0011206	126	433	311	1815	82	427	33	56
FBgn0011207	85	159	110	1	62	111	0	68
FBgn0011211	2734	2806	2818	4040	1484	358	24	363
FBgn0011217	1066	834	1029	1743	559	906	199	564
FBgn0011224	1116	983	2419	4524	854	2254	862	453
FBgn0011225	604	280	1145	2683	765	229	586	259
FBgn0011227	13	2	56	0	0	0	0	0
FBgn0011230	2440	1630	3555	5161	991	1679	729	429
FBgn0011232	101	0	31	212	108	21	0	0
FBgn0011236	412	699	629	1109	159	534	272	18
FBgn0011241	246	1	51	0	62	63	0	0
FBgn0011259	76	113	73	605	65	44	208	3
FBgn0011260	116	104	198	430	80	0	3	7
FBgn0011272	2895	1560	4063	3647	1411	1415	578	212
FBgn0011274	97	1	302	980	1	87	250	41
FBgn0011278	8	0	0	0	0	18	0	0
FBgn0011281	0	0	0	52	0	24	0	1
FBgn0011284	3273	3027	3767	4735	1742	1128	1133	168
FBgn0011286	107	0	1	193	0	33	0	2
FBgn0011288	37	172	17	118	20	134	135	52
FBgn0011289	194	207	107	339	109	103	1	1
FBgn0011290	141	0	63	90	114	90	57	0
FBgn0011291	8	0	4	1	0	0	104	0
FBgn0011296	12	0	34	0	0	24	1	0
FBgn0011297	297	123	52	146	38	19	1	0
FBgn0011300	170	364	329	1008	147	170	65	61
FBgn0011305	5	0	127	166	1	59	0	0
FBgn0011327	144	43	110	329	67	119	0	0
FBgn0011335	49	0	23	0	0	4	91	0
FBgn0011336	283	0	940	1703	376	202	43	1
FBgn0011361	247	99	228	251	76	21	237	0
FBgn0011455	146	123	68	60	0	26	185	0
FBgn0011474	409	455	268	46	19	167	81	138
FBgn0011476	29	0	15	225	4	0	0	0
FBgn0011481	703	559	213	448	177	122	159	0
FBgn0011509	129	0	129	140	44	68	0	0
FBgn0011559	0	1	9	279	0	199	0	106
FBgn0011566	43	138	47	1	0	0	0	0
FBgn0011570	320	0	285	406	75	123	0	172
FBgn0011571	1170	1020	429	1123	45	145	3	3
FBgn0011573	232	2	262	630	113	42	59	0
FBgn0011582	345	750	331	2252	595	786	4416	1240
FBgn0011584	350	382	424	547	158	110	265	68
FBgn0011586	148	0	49	2	20	1	0	0
FBgn0011589	43	0	10	394	2	0	79	9
FBgn0011591	449	1	1229	4327	722	339	443	1058
FBgn0011592	425	410	526	399	71	56	50	36
FBgn0011596	0	0	139	0	103	79	0	0
FBgn0011603	3	1	12	0	0	22	0	0
FBgn0011604	500	489	158	533	21	23	0	1
FBgn0011606	176	178	48	0	13	34	1	0
FBgn0011638	743	523	241	178	57	265	0	0
FBgn0011640	613	1003	346	378	77	5	154	266
FBgn0011642	63	108	50	0	20	83	127	0
FBgn0011648	164	498	255	1060	3	117	439	109
FBgn0011655	146	474	156	247	54	58	247	1
FBgn0011656	230	337	345	774	102	409	387	60
FBgn0011659	0	0	15	0	0	28	0	0
FBgn0011660	92	154	16	0	0	43	0	0
FBgn0011661	2949	1394	2972	11956	948	2378	2490	876
FBgn0011666	258	537	873	6739	327	730	326	161
FBgn0011672	115	108	551	1715	239	107	110	105
FBgn0011674	878	336	2193	5525	360	2050	2670	595
FBgn0011676	3	234	227	634	22	267	93	5
FBgn0011692	165	194	32	0	0	15	0	1
FBgn0011695	0	0	28	0	19	0	83	0
FBgn0011701	17	0	24	0	0	0	0	0
FBgn0011703	442	334	77	1	33	130	0	84
FBgn0011704	731	119	83	243	126	48	0	139
FBgn0011705	37	128	41	1	0	0	0	0
FBgn0011706	0	0	16	0	0	58	0	0
FBgn0011708	193	260	293	317	91	221	94	256
FBgn0011710	294	251	638	643	466	272	0	168
FBgn0011715	58	0	60	0	0	5	0	1
FBgn0011722	35	0	7	230	1	27	0	0
FBgn0011725	436	502	725	1472	286	354	224	1
FBgn0011726	514	705	678	769	184	528	381	206
FBgn0011737	45	0	110	0	15	20	0	0
FBgn0011739	389	415	563	1489	88	399	350	87
FBgn0011740	170	154	124	0	0	52	0	126
FBgn0011741	72	0	39	48	0	17	0	0
FBgn0011742	624	623	462	790	208	273	84	0
FBgn0011745	155	0	277	283	69	182	0	0
FBgn0011746	11	0	295	116	129	1	0	0
FBgn0011747	448	1047	1145	1652	475	457	208	3
FBgn0011754	142	819	560	1521	199	119	228	1
FBgn0011760	565	1251	1261	2355	333	812	427	385
FBgn0011761	8225	2611	327	0	1	116	1	0
FBgn0011762	117	0	284	519	52	444	231	195
FBgn0011763	708	822	278	530	2	275	186	1
FBgn0011764	771	605	353	2	13	133	215	3
FBgn0011766	819	241	1156	1454	452	695	311	344
FBgn0011768	262	124	151	0	0	13	157	0
FBgn0011769	57	0	88	167	16	54	0	0
FBgn0011770	166	217	68	0	35	13	0	1
FBgn0011771	161	2	170	740	48	225	195	248
FBgn0011774	56	127	0	0	27	122	122	0
FBgn0011785	888	295	551	843	133	416	148	82
FBgn0011787	165	0	44	0	0	0	0	0
FBgn0011802	43	83	93	0	48	0	0	0
FBgn0011817	161	449	878	2128	234	219	6	185
FBgn0011818	441	167	129	785	18	303	0	120
FBgn0011824	631	424	266	287	103	16	0	1
FBgn0011826	589	343	196	504	73	110	118	1
FBgn0011828	366	0	29	739	3	8	237	0
FBgn0011829	0	0	1	174	0	43	0	111
FBgn0011836	164	335	148	0	46	25	4	0
FBgn0011837	781	431	1568	2926	537	593	446	47
FBgn0012034	208	255	134	201	16	53	1	122
FBgn0012036	401	652	153	0	33	388	117	111
FBgn0012037	1	0	131	0	1	158	265	0
FBgn0012051	30	0	110	391	0	112	0	1
FBgn0012058	129	144	207	304	52	41	1	197
FBgn0013263	469	457	515	363	108	345	143	133
FBgn0013269	1714	1036	255	125	0	80	0	0
FBgn0013272	2030	901	4552	6537	1775	3724	2043	1196
FBgn0013275	0	0	14	7	0	0	22	0
FBgn0013277	3	0	24	5	12	20	0	2
FBgn0013278	24	0	80	417	27	156	4	1
FBgn0013279	13	0	106	1	60	114	0	65
FBgn0013303	72	0	62	220	1	33	2	0
FBgn0013305	51	138	172	395	88	237	179	45
FBgn0013325	1868	1317	2151	1833	967	609	675	477
FBgn0013334	286	922	518	1732	363	806	154	369
FBgn0013342	0	0	45	489	0	35	117	0
FBgn0013343	256	246	419	858	131	583	0	55
FBgn0013347	54	272	36	130	0	9	1	0
FBgn0013432	6	0	87	90	0	29	0	0
FBgn0013435	8	0	0	0	40	16	0	0
FBgn0013467	39	0	0	2	0	21	169	0
FBgn0013469	160	1	366	598	73	77	79	5
FBgn0013531	78	0	11	0	0	0	0	0
FBgn0013548	76	269	65	223	43	15	0	0
FBgn0013563	8	0	91	252	0	52	0	0
FBgn0013576	1421	1489	3382	7473	1174	6329	3026	1513
FBgn0013672	6532	3707	16178	4536	1445	5371	6043	1947
FBgn0013673	518	189	704	136	14	305	344	263
FBgn0013674	45787	11067	100980	23833	6579	25346	21101	7544
FBgn0013675	9994	2438	16290	5712	1242	5816	4719	1014
FBgn0013676	23797	6697	50840	11905	3277	17063	15719	5059
FBgn0013678	15457	3828	29778	6210	1775	10336	8968	3225
FBgn0013679	16019	2356	28366	5511	933	6362	3920	1783
FBgn0013680	2700	983	5119	2016	397	1083	576	336
FBgn0013681	334	138	359	34	0	113	64	14
FBgn0013683	391	142	1147	251	63	303	374	0
FBgn0013684	10931	5023	27893	6747	1767	5632	6875	1839
FBgn0013685	472	96	1240	150	12	167	41	128
FBgn0013686	78026	63000	489945	168844	29257	231182	305032	61104
FBgn0013688	44806	20390	151772	35180	9145	40570	42461	11305
FBgn0013689	14	0	7	0	0	3	41	0
FBgn0013690	20	0	65	0	0	0	0	0
FBgn0013691	20	0	2	0	0	27	0	0
FBgn0013694	26	0	66	0	0	0	0	101
FBgn0013695	7	68	0	0	0	13	0	0
FBgn0013697	0	0	9	0	0	27	0	0
FBgn0013698	0	0	34	0	37	0	3	0
FBgn0013699	42	0	32	0	12	0	0	0
FBgn0013702	64	0	19	0	0	0	0	0
FBgn0013703	19	0	13	0	0	0	0	0
FBgn0013704	0	0	20	0	0	0	41	0
FBgn0013709	66	0	353	0	25	0	0	0
FBgn0013710	0	0	25	0	0	0	113	0
FBgn0013717	146	0	68	0	75	11	0	1
FBgn0013718	332	126	704	1388	202	660	376	192
FBgn0013720	39	350	70	0	34	114	0	0
FBgn0013726	834	827	811	1141	234	242	142	67
FBgn0013732	173	122	10	1	0	0	0	1
FBgn0013733	2464	3393	6221	16060	1903	5776	3028	2246
FBgn0013746	79	258	76	1	10	48	0	28
FBgn0013749	49	29	72	28	66	58	89	0
FBgn0013750	236	160	244	346	13	49	100	0
FBgn0013751	1	103	21	3	44	111	2	2
FBgn0013756	1238	1026	716	674	242	189	179	150
FBgn0013759	333	651	439	619	132	688	189	6
FBgn0013762	76	0	34	0	6	9	1	0
FBgn0013763	284	27	4	0	0	34	0	0
FBgn0013764	266	163	123	188	122	37	0	0
FBgn0013765	480	311	31	0	19	132	0	0
FBgn0013770	1019	710	5153	9814	1806	2845	1962	2053
FBgn0013771	0	116	22	0	0	83	71	0
FBgn0013773	199	0	28	0	0	0	1	0
FBgn0013799	170	1	48	397	36	84	0	111
FBgn0013809	24	1	20	1	1	35	0	0
FBgn0013810	100	2	26	0	0	36	21	0
FBgn0013811	26	0	39	1	1	137	80	0
FBgn0013812	0	133	20	989	36	113	2	39
FBgn0013813	0	0	17	2	1	1	11	0
FBgn0013953	109	1	332	712	110	921	255	238
FBgn0013954	339	279	244	0	148	260	132	1
FBgn0013981	259	337	509	1	126	141	0	0
FBgn0013983	98	0	71	0	27	62	1	0
FBgn0013984	625	1009	995	1525	385	833	814	102
FBgn0013987	169	370	316	420	120	343	4	182
FBgn0013995	437	331	28	365	24	48	1	0
FBgn0013997	256	128	553	1854	171	339	3	501
FBgn0014002	1243	294	4397	6469	3606	835	680	339
FBgn0014006	81	803	164	5	84	394	88	0
FBgn0014007	178	114	218	74	46	110	0	0
FBgn0014009	189	86	350	305	211	362	125	0
FBgn0014010	296	140	978	846	338	358	540	128
FBgn0014011	260	429	284	1161	132	348	318	60
FBgn0014018	204	735	392	1966	48	677	504	131
FBgn0014020	421	100	933	1268	301	709	428	215
FBgn0014022	137	0	39	0	0	28	0	41
FBgn0014023	57	0	23	133	0	27	0	1
FBgn0014024	656	184	121	823	59	62	0	3
FBgn0014026	3087	736	3533	3742	1076	861	309	461
FBgn0014028	177	126	106	71	1	7	0	0
FBgn0014029	272	167	520	822	113	375	164	328
FBgn0014031	24	161	10	0	0	12	0	0
FBgn0014032	63	173	23	0	39	149	0	1
FBgn0014033	1	0	57	0	0	24	49	0
FBgn0014037	961	724	1764	5818	717	1531	945	186
FBgn0014073	69	0	240	1126	70	640	679	85
FBgn0014075	465	4	689	810	573	212	2	304
FBgn0014076	1328	73	3040	996	360	511	94	295
FBgn0014092	48	0	31	75	0	0	0	0
FBgn0014127	147	0	0	0	0	36	0	0
FBgn0014133	1604	914	2953	3542	707	1395	757	688
FBgn0014135	159	3	130	31	19	1007	3	2
FBgn0014141	1250	1128	2876	6219	833	3566	3476	1042
FBgn0014163	278	617	777	1107	159	884	565	83
FBgn0014184	1367	2790	3219	9663	1595	1400	1258	790
FBgn0014189	701	585	254	135	180	126	1	194
FBgn0014269	151	0	41	140	49	1	0	86
FBgn0014340	157	1	83	196	1	26	172	1
FBgn0014342	0	0	0	21	0	13	83	0
FBgn0014343	122	0	351	136	228	120	191	216
FBgn0014366	228	319	136	156	10	91	6	0
FBgn0014380	15	161	112	651	0	172	0	0
FBgn0014388	235	110	712	2293	203	201	2	249
FBgn0014391	438	316	399	205	113	107	0	0
FBgn0014396	253	173	630	1060	312	620	162	1
FBgn0014411	339	472	227	704	159	152	1	0
FBgn0014417	121	0	2	0	0	37	0	0
FBgn0014427	30	76	57	0	0	48	0	0
FBgn0014455	415	534	256	337	156	14	1	119
FBgn0014464	475	0	725	789	69	834	91	13
FBgn0014465	3429	2	3048	2403	553	2601	745	415
FBgn0014466	2059	350	3095	2400	586	3897	258	487
FBgn0014469	103	0	22	0	0	266	0	130
FBgn0014857	244	298	58	153	82	124	0	52
FBgn0014859	14	3	74	259	45	2	46	2
FBgn0014861	263	153	73	1	1	1	106	0
FBgn0014863	51	188	24	273	0	4	74	0
FBgn0014868	583	298	683	790	172	52	1	0
FBgn0014869	324	379	195	715	88	114	229	275
FBgn0014870	242	128	201	194	144	45	105	235
FBgn0014877	342	104	51	0	18	19	181	79
FBgn0014879	421	464	88	176	29	70	1	0
FBgn0014903	10	0	56	0	0	0	0	0
FBgn0014906	132	231	219	405	17	186	66	0
FBgn0014930	4	11	21	0	40	23	0	0
FBgn0014931	107	187	0	0	0	17	0	0
FBgn0015000	16	121	51	0	3	77	0	104
FBgn0015019	1448	741	743	1781	369	351	162	204
FBgn0015024	255	793	407	824	239	746	377	425
FBgn0015025	28	0	38	0	0	110	0	0
FBgn0015031	10	0	67	0	17	0	0	0
FBgn0015033	0	0	19	0	0	49	0	0
FBgn0015034	0	0	35	193	0	76	0	0
FBgn0015036	0	66	3	1	0	15	0	0
FBgn0015039	20	0	68	0	0	22	0	0
FBgn0015040	0	0	0	141	46	6	0	0
FBgn0015075	171	160	108	0	3	35	0	2
FBgn0015218	753	945	550	604	127	122	50	3
FBgn0015221	399	666	1518	4294	442	4195	2312	831
FBgn0015222	644	703	2521	4131	611	5413	2389	1450
FBgn0015229	417	256	403	961	121	543	325	1
FBgn0015239	81	265	215	771	119	135	229	2
FBgn0015240	138	532	84	0	87	59	0	9
FBgn0015245	2799	1942	888	220	67	432	121	4
FBgn0015247	144	0	121	258	61	177	0	158
FBgn0015268	2015	1887	770	522	100	125	2	1
FBgn0015269	252	163	319	1	79	108	188	128
FBgn0015277	15	0	73	0	0	37	207	0
FBgn0015278	494	330	700	1358	209	277	1	128
FBgn0015279	170	75	396	1037	175	150	1	58
FBgn0015282	285	551	452	1087	158	143	98	118
FBgn0015283	545	132	338	644	22	297	340	1
FBgn0015286	443	288	879	1984	100	476	329	16
FBgn0015288	2300	1306	3350	4291	1487	949	470	209
FBgn0015295	99	0	80	27	78	60	0	1
FBgn0015296	34	127	94	419	2	122	0	0
FBgn0015298	37	0	65	67	80	12	0	0
FBgn0015299	83	0	27	0	1	0	0	0
FBgn0015320	220	393	69	209	67	112	1	158
FBgn0015321	398	154	194	334	66	171	70	0
FBgn0015324	654	1017	1391	2592	453	538	333	357
FBgn0015331	103	0	75	0	21	81	339	2
FBgn0015336	10	0	0	119	0	0	0	0
FBgn0015338	116	0	26	143	41	57	0	0
FBgn0015351	9	0	68	372	0	116	0	0
FBgn0015359	112	182	50	3	1	115	0	0
FBgn0015360	64	1	431	453	123	141	154	94
FBgn0015371	205	159	135	1	3	0	1	0
FBgn0015372	83	170	178	390	100	117	125	0
FBgn0015376	109	213	344	498	60	177	0	0
FBgn0015379	132	0	3	2	20	1	1	0
FBgn0015380	37	1	96	174	1	14	67	5
FBgn0015391	256	315	78	141	0	38	0	0
FBgn0015393	287	226	77	0	20	1	0	0
FBgn0015396	351	283	40	453	5	85	4	4
FBgn0015399	352	208	512	1369	339	633	255	103
FBgn0015402	76	240	137	127	5	70	0	1
FBgn0015477	413	393	506	1476	183	125	159	75
FBgn0015509	686	1148	624	1995	263	446	79	69
FBgn0015513	512	418	1537	2203	549	1544	2164	506
FBgn0015519	116	16	46	370	52	79	212	7
FBgn0015520	273	83	111	374	38	5	0	0
FBgn0015521	868	603	830	1050	471	271	144	1
FBgn0015522	67	178	86	204	9	88	257	0
FBgn0015527	569	353	141	262	22	26	0	1
FBgn0015541	187	817	317	734	153	318	138	41
FBgn0015544	78	1	31	13	0	0	0	0
FBgn0015546	126	46	21	0	75	39	1	1
FBgn0015553	44	72	28	2	0	65	0	30
FBgn0015558	8	0	0	165	1	0	2	2
FBgn0015561	5	141	0	0	0	0	120	0
FBgn0015568	34	0	11	0	1	0	0	1
FBgn0015569	1	151	54	584	35	114	169	2
FBgn0015571	110	101	305	542	71	241	437	194
FBgn0015572	0	0	48	265	52	21	204	1
FBgn0015575	0	0	31	238	7	2	0	0
FBgn0015576	97	1	50	442	0	24	0	0
FBgn0015577	21	108	108	349	46	167	81	0
FBgn0015582	136	1	33	149	0	19	0	0
FBgn0015589	663	1022	487	574	288	172	203	47
FBgn0015600	851	874	1180	4331	467	1727	583	309
FBgn0015602	276	175	55	0	0	41	0	0
FBgn0015609	359	189	40	140	13	146	182	149
FBgn0015614	223	322	160	357	89	177	231	83
FBgn0015615	200	0	152	286	39	65	88	0
FBgn0015618	28	3	51	118	0	0	0	1
FBgn0015621	56	56	52	0	0	0	0	0
FBgn0015622	472	263	1058	1992	550	385	241	106
FBgn0015623	449	314	492	0	46	467	166	0
FBgn0015625	474	656	53	0	0	4	1	0
FBgn0015663	12	0	29	2	39	26	0	0
FBgn0015664	388	0	117	10	0	86	2	119
FBgn0015714	0	0	9	195	0	91	157	0
FBgn0015721	0	87	27	1	1	180	1	5
FBgn0015737	1172	506	1879	2146	688	543	322	419
FBgn0015754	194	172	326	600	74	296	176	1
FBgn0015756	1938	1452	1831	1616	706	475	10	158
FBgn0015765	60	89	75	0	0	28	0	0
FBgn0015766	995	2	692	1370	142	529	196	403
FBgn0015772	355	520	721	1669	127	891	592	318
FBgn0015773	76	99	3	76	31	8	3	53
FBgn0015774	11	1	0	169	36	28	167	173
FBgn0015776	529	136	1204	1665	490	795	65	579
FBgn0015777	98	91	457	944	34	165	57	113
FBgn0015778	1535	1697	1368	2206	719	460	83	151
FBgn0015781	16	1	31	0	18	0	0	0
FBgn0015789	516	145	435	1112	354	660	269	130
FBgn0015790	591	690	1013	2393	258	824	463	152
FBgn0015791	86	0	145	573	49	175	84	33
FBgn0015793	27	0	32	294	1	120	102	0
FBgn0015794	97	1	65	192	25	40	1	59
FBgn0015795	63	345	724	1080	349	572	617	276
FBgn0015797	202	115	324	1140	215	181	1	3
FBgn0015799	528	125	333	147	54	87	0	140
FBgn0015801	101	179	630	450	25	443	135	1
FBgn0015803	288	297	128	192	98	225	232	147
FBgn0015805	219	125	163	1	31	93	1	0
FBgn0015806	438	330	602	1469	97	783	83	140
FBgn0015808	135	276	175	186	0	102	131	0
FBgn0015818	166	1	76	0	87	95	0	0
FBgn0015828	99	54	44	2	94	23	1	0
FBgn0015829	73	0	10	0	0	58	0	0
FBgn0015834	320	125	354	455	72	118	80	100
FBgn0015838	235	0	198	1	16	93	0	202
FBgn0015872	12048	11643	12149	40661	3468	49050	81972	8033
FBgn0015903	634	471	1470	2301	321	1117	570	444
FBgn0015904	10	1	0	0	3	0	80	0
FBgn0015905	91	2	25	178	0	0	0	0
FBgn0015924	143	185	758	2404	211	906	592	365
FBgn0015925	177	119	24	197	46	46	83	0
FBgn0015926	145	229	16	0	1	10	0	0
FBgn0015929	156	258	92	0	1	24	213	0
FBgn0015949	249	147	147	158	51	165	0	0
FBgn0016013	0	0	15	0	0	34	0	0
FBgn0016031	308	384	256	1782	99	916	71	127
FBgn0016034	93	190	59	155	30	5	2	1
FBgn0016038	72	126	20	194	0	6	1	1
FBgn0016041	390	436	133	0	1	19	0	0
FBgn0016053	219	101	96	1166	15	9	132	0
FBgn0016054	65	242	0	0	30	0	0	0
FBgn0016059	468	406	1012	2666	350	1113	624	533
FBgn0016061	26	209	26	160	66	113	4	69
FBgn0016070	2085	2119	362	804	25	244	0	176
FBgn0016075	5412	508	2607	1597	561	164	272	5
FBgn0016076	272	279	1496	2868	425	1892	216	407
FBgn0016078	115	1	455	353	179	147	213	150
FBgn0016080	38	0	20	160	1	0	0	0
FBgn0016081	339	1050	1422	2488	527	1020	620	315
FBgn0016119	137	3	108	431	47	39	1	0
FBgn0016120	474	465	417	706	115	74	2	44
FBgn0016122	197	0	789	991	37	738	735	1
FBgn0016123	40	199	137	40	29	186	280	92
FBgn0016126	27	60	379	738	202	240	390	228
FBgn0016131	39	0	3	0	2	33	0	0
FBgn0016641	190	482	80	446	72	116	0	0
FBgn0016650	0	0	12	1	0	34	0	0
FBgn0016660	0	1	79	3	31	29	0	144
FBgn0016672	41	495	34	1	0	37	1	0
FBgn0016684	22	0	40	0	1	0	0	0
FBgn0016685	1336	709	608	477	187	59	70	0
FBgn0016687	386	250	234	607	87	195	0	0
FBgn0016691	103	98	180	460	178	82	1	1
FBgn0016693	140	282	726	839	166	439	325	224
FBgn0016694	350	1085	676	787	8	565	869	166
FBgn0016696	619	246	292	733	71	625	411	72
FBgn0016697	88	1	241	5	125	5	1	1
FBgn0016698	16	0	30	35	0	33	0	0
FBgn0016700	286	219	506	570	268	358	265	221
FBgn0016701	75	0	111	0	40	134	0	1
FBgn0016715	0	0	55	0	1	57	119	1
FBgn0016726	671	514	743	354	101	165	1	179
FBgn0016754	190	528	1095	1141	125	420	687	189
FBgn0016756	470	183	752	285	352	752	281	391
FBgn0016762	22	129	7	0	13	0	0	0
FBgn0016792	262	386	49	0	17	83	43	0
FBgn0016794	248	88	589	887	307	413	90	120
FBgn0016797	366	567	449	1505	49	264	110	2
FBgn0016917	536	691	863	2067	124	277	182	194
FBgn0016919	0	0	0	114	0	43	0	0
FBgn0016920	26	184	0	1	19	22	1	2
FBgn0016926	372	159	1165	803	215	354	416	185
FBgn0016930	514	352	2439	4120	677	1999	876	781
FBgn0016975	5	1	14	4	0	2	54	4
FBgn0016976	5	1	14	4	0	2	54	4
FBgn0016977	2866	2142	5969	9805	2057	7437	1866	1541
FBgn0016978	304	285	199	11	27	67	0	106
FBgn0016983	570	121	230	229	119	51	1	1
FBgn0016984	457	336	1462	3859	223	1344	1903	594
FBgn0017414	21	0	0	0	33	0	0	0
FBgn0017418	234	71	236	1303	179	413	222	143
FBgn0017424	55	249	0	0	0	0	0	0
FBgn0017429	217	0	58	192	87	13	96	0
FBgn0017430	90	0	20	0	0	0	0	0
FBgn0017448	10	0	0	242	0	0	0	0
FBgn0017457	201	165	137	438	17	49	1	0
FBgn0017482	36	0	15	179	0	39	0	0
FBgn0017545	2198	2624	2684	3719	978	903	614	965
FBgn0017550	459	341	300	621	111	245	187	104
FBgn0017551	242	0	28	0	0	0	0	0
FBgn0017556	12	0	9	599	1	2	0	0
FBgn0017558	91	182	353	751	284	162	212	37
FBgn0017561	412	1	87	0	52	37	0	63
FBgn0017566	396	52	465	852	294	122	159	0
FBgn0017567	148	0	91	385	12	0	0	0
FBgn0017572	149	0	209	557	146	137	77	134
FBgn0017577	110	131	35	2	0	0	0	0
FBgn0017578	16	476	30	0	27	157	1	0
FBgn0017579	1196	574	1855	1287	758	682	3	290
FBgn0017581	2310	2893	2695	5219	1159	2686	1027	721
FBgn0017590	1	5	17	194	3	3	3	145
FBgn0019624	527	171	509	665	157	111	89	0
FBgn0019637	202	261	102	190	31	53	0	0
FBgn0019643	0	0	67	1	19	59	1	0
FBgn0019644	234	565	364	245	156	0	0	0
FBgn0019650	11	135	8	515	32	85	2	0
FBgn0019662	115	53	208	186	44	199	164	58
FBgn0019686	283	169	90	2	10	49	0	2
FBgn0019830	127	0	219	225	78	117	0	129
FBgn0019886	565	203	399	1062	128	570	59	199
FBgn0019890	355	163	785	2167	207	1611	1595	167
FBgn0019925	239	3	414	1062	404	64	136	305
FBgn0019932	14	0	33	2	18	0	0	0
FBgn0019936	1402	923	1173	3402	762	420	9	513
FBgn0019938	492	598	169	1	34	55	123	3
FBgn0019947	183	53	243	4	40	92	0	0
FBgn0019948	11	117	144	524	94	84	91	219
FBgn0019949	13	173	26	0	23	9	1	0
FBgn0019952	10	0	139	829	1	96	1	75
FBgn0019957	213	135	253	409	163	2	1	0
FBgn0019960	359	324	374	161	193	65	1	317
FBgn0019968	459	1016	652	674	351	758	919	365
FBgn0019972	37	84	420	753	80	173	122	144
FBgn0019982	164	1	54	215	62	36	0	0
FBgn0019985	3	0	0	153	21	14	0	0
FBgn0019990	149	275	101	167	0	199	1	63
FBgn0020018	18	0	16	203	2	3	0	0
FBgn0020224	298	318	184	152	0	88	77	0
FBgn0020235	554	25	591	1003	237	168	1	226
FBgn0020236	759	233	508	1012	202	237	152	3
FBgn0020238	1464	1004	1328	3839	505	568	1056	457
FBgn0020248	214	75	22	168	8	90	179	3
FBgn0020249	103	109	171	471	65	78	296	294
FBgn0020251	324	70	338	2619	76	312	284	7
FBgn0020255	1134	1777	854	979	352	410	56	0
FBgn0020257	96	111	152	338	39	43	0	0
FBgn0020258	1	0	22	0	0	18	0	0
FBgn0020261	325	149	292	0	161	156	133	0
FBgn0020270	25	0	0	265	1	93	0	0
FBgn0020272	47	1	20	173	0	0	0	0
FBgn0020278	231	328	967	3323	629	936	729	163
FBgn0020279	2292	2075	3892	3891	1236	1974	1094	761
FBgn0020294	187	1	423	1551	213	209	9	103
FBgn0020299	121	1	99	177	45	134	64	2
FBgn0020300	77	1	20	82	40	97	0	0
FBgn0020304	709	313	1339	2882	365	2077	899	490
FBgn0020305	155	0	60	0	0	0	0	0
FBgn0020306	3561	2163	2180	2695	737	1293	295	391
FBgn0020307	0	1	65	150	42	37	0	1
FBgn0020309	739	142	1267	1934	682	2193	599	236
FBgn0020312	211	66	42	184	92	150	0	236
FBgn0020369	178	558	235	0	39	137	0	18
FBgn0020370	489	466	935	565	245	134	159	145
FBgn0020378	0	4	11	6	6	37	4	7
FBgn0020379	42	0	48	4	84	14	1	10
FBgn0020381	121	0	48	288	0	110	0	0
FBgn0020385	205	349	106	432	1	37	0	0
FBgn0020386	846	916	1117	3269	522	1176	783	72
FBgn0020388	210	2	76	0	1	199	0	131
FBgn0020389	92	6	356	244	45	124	88	0
FBgn0020391	45	1	12	0	45	44	0	0
FBgn0020392	242	108	168	165	34	56	0	0
FBgn0020407	21	0	29	1	0	0	0	0
FBgn0020412	800	482	540	422	145	321	499	83
FBgn0020414	32	0	95	82	0	91	0	1
FBgn0020415	0	151	87	0	0	13	0	0
FBgn0020440	243	223	388	513	115	129	96	164
FBgn0020443	1604	1668	1757	2432	650	368	737	251
FBgn0020445	270	203	174	438	10	49	5	0
FBgn0020493	206	137	812	1236	209	151	285	1
FBgn0020496	676	1107	832	683	254	972	325	122
FBgn0020497	348	118	348	915	248	105	226	1
FBgn0020503	312	728	568	1214	246	282	8	26
FBgn0020510	282	222	412	191	144	238	248	1
FBgn0020513	411	328	113	0	1	52	0	1
FBgn0020521	1	0	52	0	0	23	37	0
FBgn0020545	173	0	121	0	0	331	109	0
FBgn0020616	131	0	73	0	38	47	0	0
FBgn0020618	3755	1748	4331	3820	1032	1365	425	327
FBgn0020620	62	3	260	1035	137	201	0	0
FBgn0020621	579	865	1043	2383	417	817	365	153
FBgn0020622	229	60	483	278	174	125	130	132
FBgn0020626	216	135	560	882	187	237	95	164
FBgn0020633	237	76	54	195	33	25	1	1
FBgn0020647	305	183	764	1850	210	1700	756	226
FBgn0020653	909	776	1016	2292	523	926	245	206
FBgn0020655	387	1	291	162	133	92	1	0
FBgn0020762	148	335	1084	1845	246	2207	1944	650
FBgn0020764	162	0	407	699	57	493	17	69
FBgn0020766	93	0	118	299	0	134	0	0
FBgn0020767	144	3	84	128	60	98	0	4
FBgn0020887	213	112	185	181	100	127	47	0
FBgn0020906	0	300	0	0	0	0	100	0
FBgn0020909	37	326	38	98	1	0	0	0
FBgn0020910	7277	6406	12832	7315	3954	5028	1514	2259
FBgn0020930	74	1	56	241	16	68	114	0
FBgn0021750	109	211	24	0	21	37	0	0
FBgn0021760	768	885	921	1705	291	418	246	84
FBgn0021761	354	580	113	386	0	200	1	0
FBgn0021764	1550	769	1045	2280	312	1154	115	189
FBgn0021765	343	280	352	473	106	192	331	182
FBgn0021767	1	57	168	324	19	609	609	334
FBgn0021768	386	54	129	584	1	157	0	1
FBgn0021776	0	157	71	77	0	33	0	0
FBgn0021795	225	62	559	166	419	131	1	0
FBgn0021796	272	298	326	324	88	80	69	55
FBgn0021800	115	357	54	211	22	8	189	0
FBgn0021814	41	0	43	0	0	25	0	0
FBgn0021818	142	246	229	1	59	77	103	141
FBgn0021825	69	176	119	0	9	119	0	0
FBgn0021847	40	0	39	185	3	77	0	0
FBgn0021856	27	0	53	0	31	69	0	0
FBgn0021872	411	660	1469	2863	548	1178	454	855
FBgn0021874	165	112	36	186	37	16	0	0
FBgn0021875	43	213	55	0	0	32	0	1
FBgn0021895	1003	134	532	731	208	518	278	86
FBgn0021906	403	591	301	303	92	50	0	1
FBgn0021944	132	263	49	141	1	1	70	0
FBgn0021953	304	325	287	1352	54	52	1	0
FBgn0021967	182	142	150	413	37	112	0	0
FBgn0021979	254	96	364	579	98	137	1	0
FBgn0021995	912	354	174	685	24	25	113	1
FBgn0022023	584	283	820	261	228	490	116	196
FBgn0022027	35	0	86	0	50	63	0	0
FBgn0022029	241	183	85	125	45	212	0	4
FBgn0022069	527	358	230	277	34	80	1	2
FBgn0022097	311	289	291	406	142	141	219	120
FBgn0022153	359	87	190	208	63	109	0	106
FBgn0022160	39	1	248	0	53	247	490	1
FBgn0022213	484	533	81	178	58	113	1	93
FBgn0022224	72	0	5	0	0	20	0	0
FBgn0022238	162	302	288	1085	133	86	239	1
FBgn0022246	11	141	27	0	0	0	0	0
FBgn0022288	289	0	104	208	0	0	0	1
FBgn0022338	253	0	23	0	0	21	0	0
FBgn0022343	682	557	426	947	94	130	125	91
FBgn0022344	66	138	82	215	0	13	0	0
FBgn0022349	1063	494	498	734	132	128	39	145
FBgn0022355	0	0	26	379	0	0	0	1
FBgn0022361	105	83	140	7	28	116	116	0
FBgn0022382	618	682	2220	7337	746	2694	1956	478
FBgn0022699	131	1	95	269	1	25	5	0
FBgn0022700	0	0	9	322	0	1	0	0
FBgn0022702	221	0	229	421	13	193	97	136
FBgn0022708	493	287	345	841	29	54	2	153
FBgn0022709	10	0	11	0	2	0	0	0
FBgn0022710	119	30	307	701	35	287	87	67
FBgn0022720	134	141	153	366	1	35	1	0
FBgn0022724	69	0	40	0	0	0	0	0
FBgn0022764	1127	1257	1203	875	498	1057	461	192
FBgn0022768	586	603	631	1595	90	282	181	232
FBgn0022772	226	1	268	0	0	465	0	0
FBgn0022774	225	4	690	497	152	175	348	254
FBgn0022786	172	655	36	0	0	11	123	0
FBgn0022787	274	342	538	1489	262	441	303	172
FBgn0022893	2274	3368	687	1158	389	235	132	3
FBgn0022935	105	57	60	0	82	138	0	0
FBgn0022936	21	315	25	0	28	0	0	0
FBgn0022942	380	217	275	114	49	72	279	1
FBgn0022943	39	0	47	0	29	0	0	0
FBgn0022959	1028	480	833	297	317	40	142	126
FBgn0022960	217	1	275	416	101	104	1	1
FBgn0022981	196	327	8	1	11	0	0	0
FBgn0022984	120	0	101	123	25	60	0	0
FBgn0022985	272	129	193	108	20	15	0	114
FBgn0022986	22	167	147	111	17	24	1	0
FBgn0022987	54	169	93	179	103	63	0	0
FBgn0023000	33	0	77	0	1	66	95	52
FBgn0023001	180	1	222	170	218	128	0	0
FBgn0023023	10	0	65	1	1	32	2	1
FBgn0023076	93	125	176	522	44	290	45	62
FBgn0023081	261	348	211	703	62	141	0	69
FBgn0023083	419	876	575	1994	273	962	536	1
FBgn0023090	6	0	4	140	0	7	0	80
FBgn0023091	0	0	52	361	0	88	24	0
FBgn0023094	102	0	110	329	48	49	0	1
FBgn0023095	421	526	1264	3756	276	2309	1306	212
FBgn0023096	51	57	59	281	32	117	0	103
FBgn0023097	699	617	251	962	61	168	1	0
FBgn0023129	122	88	182	1007	72	112	125	1
FBgn0023130	35	32	0	0	0	137	1	94
FBgn0023143	1931	2166	1555	2684	868	759	46	173
FBgn0023167	188	101	217	196	42	168	135	83
FBgn0023169	160	211	176	654	78	173	386	1
FBgn0023170	496	0	150	36	48	117	0	0
FBgn0023171	151	0	51	0	0	19	1	0
FBgn0023172	493	944	859	2197	180	597	246	222
FBgn0023174	352	111	162	0	56	66	0	0
FBgn0023175	370	69	184	365	19	128	1	9
FBgn0023177	154	106	91	333	1	101	6	0
FBgn0023180	17	0	23	0	0	21	0	0
FBgn0023197	0	103	0	0	1	0	118	0
FBgn0023212	52	362	155	172	0	36	0	0
FBgn0023213	1723	2323	2623	2086	786	621	375	520
FBgn0023214	76	136	220	732	101	138	1	108
FBgn0023215	198	648	559	798	364	447	659	331
FBgn0023216	92	0	38	0	86	58	0	2
FBgn0023388	261	593	180	492	142	65	0	0
FBgn0023395	80	388	0	28	0	0	0	0
FBgn0023407	363	341	968	4754	394	1336	1238	450
FBgn0023423	450	418	533	1452	376	327	230	84
FBgn0023441	680	473	1664	3555	492	291	293	148
FBgn0023458	1082	1318	1219	2218	313	609	269	3
FBgn0023477	357	0	338	486	34	81	0	2
FBgn0023479	0	0	0	0	0	23	0	10
FBgn0023506	143	1	157	0	67	396	554	0
FBgn0023507	82	126	0	0	0	25	0	0
FBgn0023508	306	121	489	640	77	359	313	0
FBgn0023509	525	562	586	1188	154	414	320	366
FBgn0023510	246	208	372	681	124	274	154	265
FBgn0023511	140	0	157	1	79	115	0	0
FBgn0023512	166	429	123	13	37	144	0	0
FBgn0023513	149	0	38	207	1	35	0	70
FBgn0023514	98	0	100	0	73	34	0	0
FBgn0023515	437	692	50	0	1	19	0	11
FBgn0023516	86	0	86	134	0	146	104	25
FBgn0023517	203	211	209	495	187	1	1362	210
FBgn0023518	453	331	421	382	70	194	82	1
FBgn0023519	110	0	46	0	44	1	0	0
FBgn0023520	49	0	17	0	0	0	0	0
FBgn0023521	14	164	25	0	1	27	0	0
FBgn0023522	254	208	103	485	3	26	0	0
FBgn0023523	0	1	433	1105	80	176	146	2
FBgn0023524	9	223	15	252	0	14	90	2
FBgn0023526	219	76	328	1974	145	484	157	106
FBgn0023527	196	172	24	0	0	28	0	0
FBgn0023528	469	772	328	801	201	197	3	1
FBgn0023529	644	570	1872	2852	1064	274	188	529
FBgn0023530	25	0	43	0	0	28	0	0
FBgn0023531	56	189	99	302	3	137	2	1
FBgn0023534	0	12	6	0	0	0	0	0
FBgn0023535	7	1	73	567	55	119	1	2
FBgn0023536	83	87	5	0	0	25	0	0
FBgn0023537	237	283	214	249	20	27	1	0
FBgn0023540	0	0	9	172	1	23	147	0
FBgn0023542	286	0	109	441	0	54	1	0
FBgn0023545	2	0	37	113	59	15	0	0
FBgn0023549	111	1	447	839	116	696	482	0
FBgn0023550	0	0	42	214	0	0	0	0
FBgn0024150	53	103	24	1	25	2	1	2
FBgn0024177	165	283	8	0	0	0	0	0
FBgn0024179	19	0	158	109	112	61	2	127
FBgn0024182	477	448	388	848	178	259	293	0
FBgn0024183	1140	833	232	675	1	84	241	1
FBgn0024187	309	691	466	323	72	202	348	4
FBgn0024188	74	0	62	111	0	0	0	0
FBgn0024189	6	0	0	2	11	4	14	0
FBgn0024191	25	97	51	16	31	0	0	0
FBgn0024194	35	152	5	0	0	6	0	0
FBgn0024196	38	1	66	344	49	0	1	1
FBgn0024222	235	72	57	159	58	68	384	0
FBgn0024227	7	0	1	2	0	64	0	0
FBgn0024230	1	257	58	0	12	1	0	0
FBgn0024232	0	0	0	183	0	57	1	1
FBgn0024234	49	159	165	237	37	29	0	0
FBgn0024236	384	341	259	1420	143	21	0	136
FBgn0024238	424	504	1701	5413	309	1341	587	422
FBgn0024245	63	1	49	8	6	7	1	4
FBgn0024248	48	272	148	1	32	93	125	90
FBgn0024250	69	1	164	1331	112	200	77	2
FBgn0024251	477	448	388	848	178	259	293	0
FBgn0024273	245	126	350	765	20	319	126	109
FBgn0024277	693	807	624	2703	320	468	465	485
FBgn0024285	331	1	217	297	115	82	1	0
FBgn0024291	670	1	654	1031	114	556	338	358
FBgn0024314	336	1	181	293	70	89	0	0
FBgn0024315	533	0	245	1086	137	970	388	184
FBgn0024319	0	0	33	36	0	35	0	0
FBgn0024320	277	2	540	372	219	353	266	226
FBgn0024321	392	209	1729	5444	577	1533	715	618
FBgn0024326	115	0	159	416	111	143	131	1
FBgn0024329	544	167	482	1037	27	167	0	44
FBgn0024330	36	0	58	15	10	10	0	117
FBgn0024332	261	551	47	180	0	0	0	0
FBgn0024352	931	780	437	512	1	239	0	1
FBgn0024360	166	0	32	0	146	6	160	1
FBgn0024362	257	342	184	1	62	110	230	0
FBgn0024364	713	415	149	169	1	0	272	0
FBgn0024365	183	0	133	1261	27	56	7	2
FBgn0024366	116	0	1	99	2	33	0	0
FBgn0024371	98	103	14	172	25	32	0	0
FBgn0024432	94	188	160	199	57	174	95	0
FBgn0024491	23	0	29	1	1	52	0	90
FBgn0024509	124	320	298	272	162	90	0	0
FBgn0024510	422	216	428	581	139	342	1	90
FBgn0024542	23	0	4	2	35	0	0	0
FBgn0024555	454	452	309	172	166	94	1	133
FBgn0024556	628	283	244	243	113	47	0	2
FBgn0024558	438	211	97	141	48	82	2	0
FBgn0024689	134	0	88	3	145	12	0	0
FBgn0024698	142	117	80	0	48	0	0	1
FBgn0024728	61	547	104	266	16	30	1	0
FBgn0024732	26	312	126	143	1	48	0	0
FBgn0024733	1849	1667	2475	4784	852	811	112	91
FBgn0024734	395	259	600	1140	163	368	624	174
FBgn0024754	34	0	50	108	2	38	2	0
FBgn0024804	826	307	1286	3886	1168	582	411	122
FBgn0024806	339	224	444	1880	100	260	100	242
FBgn0024807	432	343	625	961	228	252	1	140
FBgn0024811	115	311	65	1	0	57	0	0
FBgn0024814	276	123	481	495	230	142	81	107
FBgn0024833	160	0	83	130	19	38	0	0
FBgn0024836	86	71	19	120	7	17	3	3
FBgn0024841	43	0	5	0	0	11	0	0
FBgn0024846	142	82	91	204	24	5	0	0
FBgn0024887	116	0	59	0	0	65	0	0
FBgn0024889	279	409	136	443	79	135	1	0
FBgn0024909	72	354	98	0	0	22	0	0
FBgn0024920	72	0	30	0	1	0	0	0
FBgn0024921	459	877	364	641	282	240	377	119
FBgn0024941	4	0	2	7	0	12	0	0
FBgn0024943	4	1	7	1	0	139	1	0
FBgn0024944	0	2	512	1251	35	1104	574	227
FBgn0024945	71	165	83	274	37	30	75	0
FBgn0024947	11	0	126	0	29	70	0	0
FBgn0024956	109	0	46	0	0	24	85	0
FBgn0024957	122	295	202	1310	143	60	0	50
FBgn0024958	64	39	55	0	39	16	0	1
FBgn0024963	1	0	10	0	3	45	83	1
FBgn0024973	101	160	23	134	0	126	0	0
FBgn0024975	62	0	6	0	0	0	0	0
FBgn0024980	0	1	98	118	11	73	58	2
FBgn0024983	42	0	97	227	97	0	1	0
FBgn0024984	42	141	11	0	0	0	0	0
FBgn0024985	398	580	373	616	234	383	495	1
FBgn0024986	7	0	11	124	7	0	1	0
FBgn0024987	211	201	198	1	148	22	115	1
FBgn0024989	98	93	138	964	67	561	359	378
FBgn0024991	46	120	21	0	0	22	0	0
FBgn0024992	74	156	78	0	45	198	119	0
FBgn0024994	93	0	394	225	161	47	108	0
FBgn0024995	52	1	0	181	0	0	1	0
FBgn0024996	240	0	156	152	1	14	0	99
FBgn0024998	64	245	106	3	1	40	0	0
FBgn0025109	8	1	99	116	69	39	128	1
FBgn0025111	2239	2897	3490	2946	1585	776	180	334
FBgn0025117	565	806	427	622	163	110	0	2
FBgn0025185	53	0	0	0	0	31	0	0
FBgn0025186	199	334	179	373	96	189	2	0
FBgn0025286	2048	2699	2535	2640	1238	909	329	397
FBgn0025335	6	0	108	101	0	43	0	1
FBgn0025336	226	37	37	77	32	0	0	0
FBgn0025352	383	0	474	888	155	235	96	1
FBgn0025355	85	129	93	0	57	80	3	0
FBgn0025366	364	541	340	481	140	150	89	2
FBgn0025373	6	0	74	0	31	0	0	0
FBgn0025381	430	123	405	997	101	913	240	211
FBgn0025382	173	0	61	199	0	0	1	0
FBgn0025387	0	0	1	127	25	24	0	2
FBgn0025388	97	134	5	333	1	0	0	0
FBgn0025390	2761	910	6994	6517	1185	16518	3797	2254
FBgn0025391	1	7	3	9	0	39	19	1
FBgn0025394	536	855	466	1192	158	289	352	110
FBgn0025454	9	0	9	196	0	0	0	133
FBgn0025455	646	772	641	1440	119	333	156	214
FBgn0025456	50	0	118	89	0	202	0	145
FBgn0025457	349	15	54	0	0	0	121	0
FBgn0025463	387	1	116	0	98	49	0	0
FBgn0025469	0	0	31	0	26	3	0	0
FBgn0025519	27	1	25	181	65	4	0	0
FBgn0025525	199	199	111	343	43	762	57	4
FBgn0025549	159	133	66	97	23	47	0	0
FBgn0025558	33	0	14	0	23	15	0	0
FBgn0025571	343	43	246	165	42	83	0	0
FBgn0025574	200	655	589	1077	257	313	104	115
FBgn0025582	538	328	565	988	2	212	135	1
FBgn0025592	123	0	49	214	39	2	0	0
FBgn0025595	9	0	16	0	0	0	0	0
FBgn0025608	130	502	343	0	191	185	1	109
FBgn0025615	99	0	75	229	0	0	0	0
FBgn0025621	112	1	178	0	9	139	0	0
FBgn0025624	103	54	26	3	0	15	112	0
FBgn0025625	0	0	20	87	0	66	107	0
FBgn0025626	146	426	109	0	39	43	6	1
FBgn0025628	230	139	161	119	72	22	61	64
FBgn0025629	207	0	97	0	0	1	0	0
FBgn0025630	83	0	78	14	0	28	0	0
FBgn0025631	106	133	477	1076	55	269	68	58
FBgn0025632	122	138	192	1206	38	158	269	220
FBgn0025633	660	934	409	994	113	170	82	0
FBgn0025634	75	0	75	0	0	23	0	0
FBgn0025635	95	1	43	0	0	76	0	24
FBgn0025637	704	295	405	1185	47	229	0	3
FBgn0025638	385	353	215	765	199	155	2	55
FBgn0025639	1175	656	857	457	180	434	301	3
FBgn0025640	139	146	53	76	23	116	7	0
FBgn0025641	598	464	239	389	29	175	19	5
FBgn0025674	153	139	150	195	58	72	7	2
FBgn0025678	419	5	892	2009	616	56	3	8
FBgn0025680	85	0	115	0	26	61	0	0
FBgn0025681	83	727	327	492	32	133	71	140
FBgn0025682	287	0	1192	755	668	241	258	288
FBgn0025683	345	866	1388	1932	394	1122	822	660
FBgn0025684	35	0	45	39	27	33	3	0
FBgn0025687	7	0	88	231	1	17	0	0
FBgn0025692	6	0	69	181	0	62	44	0
FBgn0025693	105	117	95	259	0	55	0	36
FBgn0025697	0	1	16	253	1	0	112	0
FBgn0025700	150	9	442	416	398	16	75	256
FBgn0025702	0	0	15	0	0	18	117	0
FBgn0025712	0	0	33	234	39	0	1	0
FBgn0025716	77	0	61	259	47	23	0	1
FBgn0025720	160	0	66	1	26	86	0	1
FBgn0025724	424	0	839	1773	435	592	67	448
FBgn0025725	786	290	1078	854	693	427	225	0
FBgn0025726	589	949	716	1556	447	534	279	2
FBgn0025739	146	0	34	51	0	19	0	0
FBgn0025740	100	0	47	299	88	27	0	0
FBgn0025741	656	1309	1261	2064	600	1063	114	189
FBgn0025742	107	153	229	190	43	64	0	68
FBgn0025743	322	1	171	0	1	190	0	1
FBgn0025777	154	0	74	202	0	34	1	1
FBgn0025781	109	1	0	106	0	17	0	0
FBgn0025790	85	136	139	0	0	45	1	0
FBgn0025800	405	2	489	218	34	132	85	116
FBgn0025802	356	1	182	626	11	179	0	196
FBgn0025806	25	0	145	284	63	90	0	107
FBgn0025807	81	1	8	0	38	0	0	0
FBgn0025808	124	108	13	0	0	0	0	0
FBgn0025809	69	0	73	0	0	0	0	0
FBgn0025814	39	1	98	397	40	11	89	0
FBgn0025815	124	92	60	0	0	25	0	0
FBgn0025820	0	0	16	0	28	0	0	0
FBgn0025825	61	152	53	0	0	0	1	115
FBgn0025830	85	0	76	103	13	0	0	0
FBgn0025832	66	138	6	274	0	0	0	0
FBgn0025835	1	3	4	2	24	15	0	14
FBgn0025836	430	684	459	1012	248	413	0	0
FBgn0025837	13	0	0	0	1	10	0	0
FBgn0025838	0	1	0	308	0	38	0	0
FBgn0025839	100	119	106	126	1	0	1	1
FBgn0025864	679	653	1309	2838	375	760	450	205
FBgn0025865	220	61	1532	3035	296	713	1	142
FBgn0025866	205	154	386	2150	171	447	353	69
FBgn0025874	17	0	80	13	31	18	0	76
FBgn0025878	60	1	20	67	0	27	0	0
FBgn0025879	44	1	322	571	139	130	97	112
FBgn0025885	398	393	543	456	158	506	136	371
FBgn0025936	299	320	214	75	240	144	133	61
FBgn0026015	355	158	187	0	61	53	0	0
FBgn0026056	197	0	27	0	0	70	0	0
FBgn0026058	1	175	4	40	3	3	0	1
FBgn0026059	372	213	671	1381	391	363	389	0
FBgn0026060	745	337	319	831	85	141	309	155
FBgn0026061	158	36	87	9	18	69	104	96
FBgn0026063	25	0	22	180	0	8	0	0
FBgn0026064	25	0	22	180	0	8	0	0
FBgn0026076	104	0	166	8	142	100	0	0
FBgn0026077	0	0	16	0	8	0	0	0
FBgn0026079	267	0	234	378	109	71	0	53
FBgn0026080	5	2	68	1141	126	32	1	4
FBgn0026083	1399	1633	1790	4077	468	861	1127	200
FBgn0026084	634	648	2913	4757	389	3445	1726	1138
FBgn0026085	76	0	52	205	38	3	7	0
FBgn0026086	126	413	327	271	173	231	243	25
FBgn0026088	43	0	10	131	2	1	0	0
FBgn0026089	81	132	38	0	0	21	0	0
FBgn0026090	17	0	26	0	39	63	0	0
FBgn0026143	262	99	55	1	27	22	0	0
FBgn0026144	277	220	25	0	21	20	0	0
FBgn0026147	364	14	110	0	16	178	0	0
FBgn0026148	9	0	14	0	0	3	0	0
FBgn0026149	142	323	65	177	1	61	0	2
FBgn0026150	90	100	181	205	0	100	0	88
FBgn0026160	69	191	749	1955	448	727	46	252
FBgn0026169	31	0	168	194	12	124	13	0
FBgn0026179	369	149	863	3107	166	786	896	414
FBgn0026181	882	785	972	1351	278	783	203	119
FBgn0026189	251	217	610	1739	284	295	238	68
FBgn0026190	0	0	0	0	0	19	40	0
FBgn0026192	89	0	105	503	0	45	67	0
FBgn0026196	1433	916	300	165	63	64	1	1
FBgn0026197	11	93	32	0	0	27	1	0
FBgn0026199	85	149	134	0	75	95	221	26
FBgn0026206	433	787	249	449	66	291	5	77
FBgn0026207	56	127	59	0	23	0	0	0
FBgn0026238	409	2	391	589	38	213	111	65
FBgn0026239	627	552	1932	2852	245	353	386	200
FBgn0026250	687	262	882	2559	348	474	650	214
FBgn0026252	1942	1624	562	1118	182	216	0	3
FBgn0026257	40	0	17	1	0	4	7	0
FBgn0026259	1860	920	1524	1655	267	381	92	119
FBgn0026261	90	0	59	0	0	0	0	0
FBgn0026262	361	712	323	677	164	174	1	135
FBgn0026263	185	0	30	152	0	45	0	0
FBgn0026309	80	150	9	87	29	22	0	0
FBgn0026313	278	123	155	188	123	73	44	0
FBgn0026315	0	1	0	168	0	0	0	117
FBgn0026316	228	210	91	0	0	20	0	0
FBgn0026317	194	0	238	103	90	27	0	0
FBgn0026319	31	0	158	465	88	635	57	0
FBgn0026323	363	109	220	177	79	28	1	217
FBgn0026324	12	0	16	0	0	0	0	0
FBgn0026326	104	0	100	230	22	1	0	0
FBgn0026369	431	183	311	137	122	147	0	32
FBgn0026370	669	783	663	173	350	392	176	86
FBgn0026371	104	1	39	223	0	53	122	0
FBgn0026372	4907	3449	6477	4725	1779	1988	657	705
FBgn0026373	86	188	12	0	34	0	0	1
FBgn0026374	22	0	177	1	33	224	298	0
FBgn0026375	243	516	497	527	229	283	267	4
FBgn0026376	264	2	878	1391	220	486	223	50
FBgn0026378	50	186	65	606	1	26	3	0
FBgn0026379	93	138	44	382	6	69	1	92
FBgn0026380	203	0	94	199	41	3	0	0
FBgn0026388	0	146	2	206	34	39	0	0
FBgn0026393	0	0	18	0	7	48	0	0
FBgn0026396	0	0	17	165	0	0	0	0
FBgn0026400	88	0	114	0	0	17	0	0
FBgn0026401	421	1058	621	1273	283	815	128	121
FBgn0026402	31	0	32	171	24	0	0	0
FBgn0026404	274	271	125	160	54	239	20	0
FBgn0026409	1190	729	1451	414	805	556	0	233
FBgn0026411	3	9	16	134	12	16	9	12
FBgn0026415	271	438	25	28	1	21	0	0
FBgn0026417	54	0	76	0	37	42	0	10
FBgn0026418	1329	1366	1189	1892	367	347	531	1
FBgn0026427	589	635	472	326	51	484	314	0
FBgn0026428	107	242	109	0	54	138	1	1
FBgn0026430	256	493	52	196	2	49	129	0
FBgn0026431	9	1	37	173	0	0	20	0
FBgn0026432	20	115	18	1	19	56	0	1
FBgn0026433	128	66	75	178	16	48	47	0
FBgn0026439	2	0	25	154	0	100	0	1
FBgn0026441	241	97	310	232	0	199	117	1
FBgn0026479	187	0	326	485	113	343	0	1
FBgn0026533	888	586	672	217	164	118	29	0
FBgn0026562	172	0	161	0	1	71	0	0
FBgn0026566	117	0	18	0	41	0	0	0
FBgn0026570	25	0	14	89	0	58	0	0
FBgn0026573	387	246	89	1	36	81	103	0
FBgn0026575	1205	991	870	768	221	511	5	43
FBgn0026576	142	204	208	753	34	94	0	94
FBgn0026577	679	317	519	673	249	374	0	3
FBgn0026582	26	193	55	218	38	51	0	1
FBgn0026592	26	0	63	312	1	0	0	1
FBgn0026593	3	0	35	0	16	85	122	0
FBgn0026597	290	112	129	333	50	69	0	1
FBgn0026598	214	1	26	138	29	4	0	1
FBgn0026602	65	99	165	663	73	244	1	70
FBgn0026616	550	434	167	351	88	143	19	142
FBgn0026619	132	1	50	240	0	90	1	0
FBgn0026620	520	1072	369	796	143	271	442	84
FBgn0026630	168	146	112	0	46	55	0	0
FBgn0026634	65	112	67	192	18	114	0	0
FBgn0026666	0	0	16	122	0	81	0	0
FBgn0026679	268	0	60	178	51	56	101	0
FBgn0026702	118	0	9	1	6	134	0	0
FBgn0026713	529	808	665	1650	198	428	124	185
FBgn0026718	197	211	116	445	18	84	11	0
FBgn0026721	51	144	0	0	15	1	0	0
FBgn0026722	297	106	123	446	9	53	136	0
FBgn0026737	12	0	13	0	0	27	0	0
FBgn0026738	66	0	44	77	0	9	0	0
FBgn0026741	47	0	49	0	0	49	0	0
FBgn0026749	92	21	102	31	15	159	99	1
FBgn0026751	64	0	33	0	0	89	0	0
FBgn0026753	1269	327	965	1363	297	386	383	7
FBgn0026761	239	460	113	189	31	1	1	0
FBgn0026777	633	139	325	11	9	208	155	0
FBgn0026778	3	0	23	450	0	1	1	0
FBgn0026787	118	171	68	763	27	0	0	0
FBgn0026869	351	596	673	1973	323	450	21	164
FBgn0026872	98	0	41	427	0	0	0	0
FBgn0026873	17	0	30	0	16	12	0	0
FBgn0026876	37	1	11	0	0	0	0	0
FBgn0026879	437	0	213	0	9	38	236	0
FBgn0027052	166	0	51	0	0	42	0	0
FBgn0027053	231	272	55	274	56	30	0	1
FBgn0027054	112	0	101	1	0	0	0	0
FBgn0027055	68	0	63	283	1	17	1	0
FBgn0027057	315	179	32	210	59	25	0	0
FBgn0027066	361	155	440	1126	179	284	429	249
FBgn0027070	57	0	21	0	31	0	0	0
FBgn0027073	0	0	21	0	0	17	0	0
FBgn0027079	818	610	324	111	197	45	157	1
FBgn0027080	392	1	353	150	374	299	0	1
FBgn0027081	772	684	406	944	205	113	0	150
FBgn0027082	26	129	1	0	17	0	0	1
FBgn0027083	35	13	12	1	0	0	0	134
FBgn0027084	889	626	280	275	74	111	0	1
FBgn0027085	35	161	83	0	90	41	0	0
FBgn0027086	460	203	200	141	170	142	113	298
FBgn0027087	450	475	211	476	150	304	85	0
FBgn0027088	427	160	308	267	134	186	101	140
FBgn0027090	218	107	127	144	81	125	0	0
FBgn0027091	172	88	101	250	60	163	0	0
FBgn0027093	391	1	91	442	56	7	1	0
FBgn0027094	618	250	584	1461	180	158	138	132
FBgn0027095	169	122	367	765	213	107	0	0
FBgn0027101	185	88	191	399	28	309	236	69
FBgn0027106	454	74	745	2575	788	805	664	369
FBgn0027108	557	143	2338	3770	1109	1654	764	410
FBgn0027111	0	0	0	424	0	0	56	1
FBgn0027259	38	0	22	0	0	0	0	0
FBgn0027279	492	707	632	724	49	327	229	212
FBgn0027280	279	2	484	1156	305	412	279	290
FBgn0027287	754	664	2321	4055	560	471	254	303
FBgn0027291	453	300	492	323	129	51	37	1
FBgn0027296	16	78	40	275	41	0	0	0
FBgn0027329	939	1136	504	873	121	226	1	110
FBgn0027330	372	327	154	58	24	11	0	0
FBgn0027334	203	0	65	0	0	1	0	0
FBgn0027335	666	693	961	2508	186	1268	1321	423
FBgn0027338	828	444	771	1623	200	446	200	86
FBgn0027339	321	201	1153	1983	751	636	287	432
FBgn0027341	9	0	10	0	0	0	0	0
FBgn0027342	125	318	72	244	77	15	1	45
FBgn0027343	27	166	175	568	1	218	147	0
FBgn0027348	202	514	0	0	0	16	0	0
FBgn0027356	306	7	296	862	64	254	184	80
FBgn0027358	92	0	45	339	27	28	0	0
FBgn0027359	68	145	16	3	17	0	0	0
FBgn0027360	207	0	36	1	0	18	2	52
FBgn0027363	196	112	446	788	81	242	132	97
FBgn0027364	171	0	291	197	16	86	1	0
FBgn0027375	53	0	58	1	0	33	0	0
FBgn0027376	1	124	31	221	0	18	0	1
FBgn0027378	75	0	12	81	0	1	0	0
FBgn0027453	34	126	74	172	46	25	0	0
FBgn0027490	130	140	104	0	73	71	2	120
FBgn0027491	26	0	17	0	0	26	0	0
FBgn0027492	895	789	898	3867	394	872	166	263
FBgn0027493	642	109	429	349	18	40	139	124
FBgn0027494	23	117	0	0	0	0	0	0
FBgn0027495	84	1	103	385	69	19	0	132
FBgn0027496	180	237	263	233	180	138	0	1
FBgn0027497	124	1	253	468	45	138	0	0
FBgn0027498	62	0	37	0	0	9	0	0
FBgn0027499	192	278	340	585	110	117	1	0
FBgn0027500	567	592	37	0	0	40	0	0
FBgn0027503	256	0	163	142	0	143	0	1
FBgn0027504	632	556	464	1763	148	222	167	222
FBgn0027505	87	79	155	0	129	83	0	0
FBgn0027506	420	642	331	725	150	410	322	2
FBgn0027507	284	210	96	0	0	37	117	0
FBgn0027508	157	16	265	1227	134	262	0	1
[truncated: 7,220 more rows]

## Sheet: Table S5
Table S5 - Normalized gene expression (backtransformed rlog(counts)) in the double negative cell fraction (mCherry-GFP-), FHV∆B2eGFP restrictive (mCherry+GFP-) and permissive (mCherry+GFP+) follicular somatic cells of tj-Gal4,UAS-mCherry::NLS; UAS-FHV∆B2eGFP,UAS-CrPV-1A flies
	mCherry-GFP-		mCherry+GFP-			mCherry+GFP+
gene_id	tjFHV-1A_NN-1	tjFHV-1A_NN-2	tjFHV-1A_PN-1	tjFHV-1A_PN-2	tjFHV-1A_PN-3	tjFHV-1A_PP-1	tjFHV-1A_PP-2	tjFHV-1A_PP-3
FBgn0000003	1.73218	1.54684	2.06716	1.54604	1.54746	2.04343	1.54728	1.54848
FBgn0000008	336.525	230.2	745.54	1980.55	1175.51	286.818	736.819	445.767
FBgn0000015	3.70931	3.21939	3.71497	2.68294	3.67175	2.68485	2.68698	3.02997
FBgn0000017	508.447	611.107	821.794	730.185	683.723	1108.43	854.109	1039.22
FBgn0000018	2.04855	1.57786	1.8541	1.57634	1.57906	2.66073	1.57871	1.581
FBgn0000024	3.71015	2.97187	5.83058	11.1716	3.18054	2.58143	3.12165	3.49211
FBgn0000028	2.94059	2.56936	2.56465	2.56176	4.35672	7.00454	2.89315	3.60649
FBgn0000032	33.5382	43.363	35.0713	3.26795	31.8664	32.528	3.59802	3.87196
FBgn0000036	5.82251	29.1684	4.18315	4.16504	8.68517	20.3144	6.32392	9.94595
FBgn0000037	1.59693	3.34252	20.576	55.1299	1.76855	1.59408	47.6239	3.80423
FBgn0000038	1.94411	1.94577	3.7358	5.15489	1.95099	1.94401	1.94949	2.44034
FBgn0000042	4576.71	4325.81	4675.49	4066.72	4001.35	4797.98	3098.34	4733.38
FBgn0000043	769.404	1003.26	1840.48	1724.78	1639.75	2104.01	2073.63	2817.68
FBgn0000044	40.4946	2.6728	11.7314	21.5974	2.754	20.0471	2.73097	2.87654
FBgn0000046	13.4374	1.31394	2.02847	1.26872	2.0114	4.19292	1.3367	1.39125
FBgn0000052	262.029	53.9278	112.608	50.2098	220.473	56.439	4.12644	2.92017
FBgn0000053	285.206	552.585	187.476	91.9269	101.947	129.976	3.83446	2.76194
FBgn0000054	41.0323	145.156	54.168	24.3047	41.0276	16.0622	2.762	3.22432
FBgn0000055	169.91	229.856	17.4088	0.921056	53.4847	16.7345	149.733	2.32537
FBgn0000056	169.91	229.856	17.4088	0.921056	53.4847	16.7345	149.733	2.32537
FBgn0000057	42.0023	2.53839	9.05332	42.9633	4.99078	16.236	2.61058	2.7891
FBgn0000063	56.2999	1.57818	11.6511	16.6246	1.66618	3.76292	1.64169	1.79143
FBgn0000064	520.408	674.148	436.643	455.352	623.716	732.759	641.004	205.908
FBgn0000075	304.212	2.15962	123.761	92.3287	38.3479	117.308	237.308	69.4656
FBgn0000083	265.156	261.453	358.64	800.593	362.18	745.081	1142.83	358.623
FBgn0000084	79.0307	141.17	122.915	140.867	129.473	135.82	2.97543	209.398
FBgn0000092	1.81673	1.81828	3.26132	4.51127	1.82314	1.81663	2.09247	1.83084
FBgn0000097	417.229	748.83	615.741	1100.04	999.238	449.851	530.615	16.7282
FBgn0000100	2820.44	1860.57	2754.88	1696.79	3298.41	1171.72	1594.4	1290.87
FBgn0000108	9.53337	2.51353	14.5492	48.5038	3.14153	1.35354	4.15264	143.213
FBgn0000109	9.68252	1.48074	6.48996	35.4842	34.5768	8.44397	1.63489	195.752
FBgn0000114	1430.57	2387.46	244.222	157.687	251.697	341.48	714.754	744.655
FBgn0000115	65.5931	105.144	33.6365	14.6423	37.0094	16.4188	2.91472	171.074
FBgn0000116	509.611	1101.64	435.684	424.429	465.772	334.878	172.907	478.225
FBgn0000117	541.418	298.23	471.359	343.93	426.053	387.483	251.083	658.575
FBgn0000119	323.154	288.283	233.658	150.928	104.817	89.997	6.11908	6.31504
FBgn0000139	15.247	4.35836	10.0936	18.8415	6.0673	17.62	4.38623	5.79467
FBgn0000140	120.829	164.56	3.30452	0.968428	12.725	2.3926	1.02863	1.30114
FBgn0000146	86.0119	89.3822	18.422	42.2308	2.54977	22.4278	4.08958	2.87258
FBgn0000147	57.6624	1.95828	21.9047	156.969	56.6373	6.61428	148.5	5.47776
FBgn0000150	1834.65	1658.76	653.055	273.525	909.081	335.791	471.108	272.344
FBgn0000157	2.86878	2.16587	2.16372	2.2962	2.41118	4.34151	2.1678	2.88053
FBgn0000158	15.773	3.28646	6.7966	15.553	3.30365	3.28068	3.29868	3.33125
FBgn0000163	460.271	140.308	558.739	756.987	602.831	599.921	488.681	440.135
FBgn0000166	29.2442	29.9271	0.613042	0.551276	0.770948	0.661336	0.750009	2.1909
FBgn0000173	52.8557	1.87638	98.3215	183.89	141.852	58.0397	4.09292	265.486
FBgn0000179	23.208	36.0838	20.2098	8.14828	77.2403	15.4645	38.6682	184.016
FBgn0000180	12.0309	5.83148	12.8479	53.0851	52.4415	25.4371	17.8848	53.1109
FBgn0000181	1954.27	647.073	873.924	492.879	477.983	169.106	380	6.76311
FBgn0000182	835.925	1219.62	60.4539	1.50413	8.99228	51.8863	4.11656	4.18424
FBgn0000183	259.859	418.708	242.992	209.261	190.467	189.116	126.4	279.515
FBgn0000210	963.339	380.736	1207.44	747.48	1938.48	837.989	1267.45	2108.81
FBgn0000212	483.375	148.12	308.598	148.138	236.483	159.062	167.452	243.066
FBgn0000221	9.7261	28.8322	2.6877	25.7915	24.1442	2.72568	2.80837	2.94723
FBgn0000228	283.191	548.581	123.851	89.7463	122.214	168.466	2.34963	276.332
FBgn0000229	7.28493	1.70374	6.29348	1.78805	1.71954	1.69829	1.71504	1.74364
FBgn0000239	312.85	479.143	99.1832	67.0887	154.745	220.503	181.582	6.85723
FBgn0000241	4.94617	3.13833	7.36678	12.7665	3.15364	5.35235	3.65378	3.178
FBgn0000244	23.7017	5.99337	83.7235	55.4228	43.0858	97.674	104.509	215.133
FBgn0000247	248.164	189.428	202.657	283.995	112.2	145.324	253.516	16.8415
FBgn0000250	408.88	323.875	266.296	126.09	170.663	542.635	487.07	444.983
FBgn0000251	218.734	119.606	11.0895	1.21041	1.50849	30.9617	1.43413	122.769
FBgn0000253	578.681	1398.06	680.235	1401.64	910.224	836.175	1434.04	1710.44
FBgn0000256	157.096	188.892	109.326	14.8792	124.624	90.4234	307.486	163.264
FBgn0000257	32.6659	4.2014	32.9328	33.0683	45.6321	12.963	52.9444	4.63321
FBgn0000259	67.3943	462.02	190.05	141.58	311.434	134.008	2.39354	238.167
FBgn0000261	337.5	506.548	319.112	168.229	263.525	436.647	140.871	442.488
FBgn0000273	399.415	576.573	452.7	490.583	510.399	492.138	928.293	285.862
FBgn0000283	340.983	688.483	196.53	121.623	189.602	121.374	196.614	576.653
FBgn0000286	97.9381	148.972	62.6232	84.2825	75.1779	111.884	2.70527	3.36927
FBgn0000289	386.197	577.212	313.537	259.916	111.573	258.901	172.419	249.512
FBgn0000299	5582.17	966.585	1403.49	328.553	521.538	139.506	115.349	12.4269
FBgn0000303	6.64715	4.97822	6.03072	4.07577	6.55535	9.88439	5.30622	4.85887
FBgn0000307	397.522	435.583	349.963	394.391	447.542	312.628	610.884	625.297
FBgn0000308	661.377	1009.3	1103.32	1483.5	2050.17	892.752	979.71	1063.09
FBgn0000316	154.786	69.7467	92.0531	67.8868	31.1728	59.799	100.541	4.3722
FBgn0000317	340.735	376.005	261.469	137.18	641.97	269.26	2.33169	129.951
FBgn0000318	83.3564	6.97838	40.5723	63.851	61.7694	38.6658	5.3855	6.81548
FBgn0000319	1051.2	1077.8	1173.95	1327.35	1715.99	970.867	667.905	1293.13
FBgn0000320	283.13	2.91405	349.34	194.361	196.26	190.209	5.32067	5.45683
FBgn0000326	10.3417	19.616	8.31499	1.51936	1.64856	1.57674	1.63379	1.72467
FBgn0000330	29.7022	61.0312	45.9372	75.9838	25.8515	71.7008	192.688	4.00526
FBgn0000339	17.0786	124.182	19.7504	15.6835	11.3611	24.7377	2.68191	2.98309
FBgn0000346	4.27247	334.371	6.38293	0.78594	1.06831	0.921837	1.03956	5.67126
FBgn0000352	56.8374	50.5688	37.7604	1.96381	2.56405	30.86	89.7383	2.89194
FBgn0000355	927.545	667.773	10125.4	7120.14	3915.09	25670.2	14916.8	25245.9
FBgn0000356	134.095	146.993	3376.93	1231.64	594.982	3185.3	2835.91	1231.29
FBgn0000357	933.662	252.217	7923.03	3492.15	1424.4	12850.1	8027.05	6733.73
FBgn0000358	697.508	428.64	4434.95	2419.33	1039.25	5291.59	7607.13	3408.73
FBgn0000359	3564.94	339.347	6167.76	2542.62	2476.19	10374.4	8490.46	8555.92
FBgn0000360	7348.74	1300.36	13934.8	7138.49	5960.41	20703.9	16887.3	13720.3
FBgn0000370	610.56	330.274	778.486	442.185	919.24	889.174	616.32	724.3
FBgn0000376	128.07	231.933	40.7862	1.29602	1.67296	37.8636	161.975	2.09504
FBgn0000377	132.074	1.87984	45.2639	27.5749	85.9195	47.5242	2.07454	2.51331
FBgn0000382	438.249	442.803	374.084	391.766	296.374	580.378	642.706	115.597
FBgn0000384	121.766	63.7868	55.9067	75.9018	79.4797	56.2314	3.37707	7.07336
FBgn0000392	885.228	1241.99	75.6089	94.1721	77.4101	47.7706	1.48197	2.16254
FBgn0000394	32.1728	2.79808	9.91332	16.446	2.85541	6.24812	2.83912	4.40964
FBgn0000395	162.572	114.201	450.928	377.939	297.893	1310.33	987.507	3.24895
FBgn0000404	857.92	1068.95	56.6268	46.5691	1.27755	19.6088	4.08285	1.72238
FBgn0000405	1790.37	2150.44	125.416	1.88155	35.0915	82.2735	4.36281	7.03331
FBgn0000409	420.157	232.434	134.433	15.6705	33.5293	130.896	2.15616	213.592
FBgn0000412	510.929	544.179	122.835	13.1859	69.4123	47.3082	1.52557	2.1516
FBgn0000413	262.11	252.688	222.271	88.7085	123.097	249.891	185.603	329.494
FBgn0000414	112.507	172.689	25.6933	1.57599	3.76268	58.0987	1.83948	118.855
FBgn0000416	1970.44	1241.93	4011.31	3278.56	4294.28	3156.76	2236.38	6093.46
FBgn0000422	1.49944	1.50084	2.08944	1.54972	1.5052	3.87027	1.50395	1.51203
FBgn0000426	32.24	33.8627	7.75035	0.997842	1.25755	1.12116	2.24926	1.38966
FBgn0000427	12857.5	905.155	24074.5	23145.5	45437.3	13987.6	9477.18	29188.8
FBgn0000442	3.17999	4.46153	8.08734	16.3101	3.91179	11.1706	3.20568	3.252
FBgn0000447	18.5238	1.73486	10.0196	1.66396	1.78474	9.58848	1.77075	1.85743
FBgn0000448	113.721	28.5495	383.057	498.438	813.672	105.38	157.452	263.888
FBgn0000451	1.58128	1.59003	1.56762	8.73886	2.24278	1.58073	1.60904	9.72843
FBgn0000454	419.244	505.703	2951.44	2238.22	1190.24	4445.13	4420.73	4108.05
FBgn0000455	17.8747	184.026	49.1543	21.4298	37.8274	69.6567	53.1537	10.0987
FBgn0000463	310.843	308.491	110.696	37.0673	127.106	24.0112	12.2082	8.97981
FBgn0000464	429.784	9.27794	438.324	306.019	501.594	223.619	350.954	451.595
FBgn0000479	228.545	540.489	92.4393	127.491	366.935	262.067	542.027	186.188
FBgn0000482	78.9978	247.241	67.6184	57.6172	152.9	69.0299	119.079	217.65
FBgn0000489	52.496	2.84965	289.73	365.719	354.21	601.38	612.831	2.68791
FBgn0000490	11.4718	2.71345	48.9256	93.3042	195.689	10.1686	3.25315	2.11492
FBgn0000497	63.9724	58.263	7.06308	39.2017	7.08275	6.28375	51.9978	10.7512
FBgn0000499	44.5347	2.35845	29.8097	6.52247	22.4345	24.2659	129.715	2.904
FBgn0000504	35.7832	5.94911	55.4823	59.1275	30.0114	117.433	5.39385	17.2318
FBgn0000520	36.4969	43.3778	3.86843	49.6311	31.409	42.5474	3.45627	3.77299
FBgn0000524	166.645	214.037	133.811	144.068	23.0094	74.1626	2.38722	8.9017
FBgn0000527	4.43039	2.97888	4.14901	3.36008	3.22279	4.81965	2.9807	2.98562
FBgn0000533	4.24285	2.01206	2.00915	2.00738	2.29406	4.39771	2.01465	2.02156
FBgn0000535	15.0825	75.6397	4.49538	39.4515	43.6572	44.5371	50.1657	33.049
FBgn0000536	35.2346	3.80868	22.0723	2.81654	28.9525	18.4427	3.01617	3.18509
FBgn0000541	681.768	1492.02	531.518	438.902	462.361	261.068	508.467	418.892
FBgn0000542	311.315	189.256	223.981	328.639	297.935	112.822	357.46	235.002
FBgn0000543	40.0091	3.78159	51.0389	77.086	53.8367	77.3988	34.9954	7.39144
FBgn0000546	485.078	15.8294	1180.08	1857.5	1281.47	755.5	905.055	1454.35
FBgn0000547	1101.39	930.823	716.121	600.405	630.3	955.498	2470.79	1061.88
FBgn0000556	16049.8	18370	15330.6	7781.91	19418.3	7705.1	4440.84	8734.31
FBgn0000557	4.54133	3.62013	20.4878	60.8963	25.956	45.8476	47.4903	8.5463
FBgn0000559	6828.28	7911.94	5889.26	3949.57	6890.22	3445.82	3160.75	4488.12
FBgn0000562	354.601	357.92	413.304	463.527	597.833	302.711	417.541	373.93
FBgn0000565	43.0235	24.2421	18.7823	2.9684	18.5539	3.50959	2.89512	3.06418
FBgn0000566	169.29	137.271	35.6574	2.19947	45.4569	21.7155	1.99963	7.42276
FBgn0000567	697.418	389.434	1203.43	1948.92	1157.11	815.734	725.617	1341.96
FBgn0000568	374.815	791.601	2015.17	2737.15	2629.09	1796.11	1957.2	2352.31
FBgn0000575	280.202	600.609	419.546	378.246	204.316	392.512	174.259	601.119
FBgn0000578	459.138	502.039	568.825	657.636	369.02	391.002	855.322	350.81
FBgn0000579	914.081	1005.32	740.725	377.808	1032.09	730.155	391.805	887.648
FBgn0000581	832.253	1176.12	295.841	173.535	370.122	521.003	538.466	331.87
FBgn0000588	6.10445	2.06044	2.69421	2.05067	2.06795	4.92233	2.06579	2.07985
FBgn0000611	346.143	113.152	174.03	88.5129	279.578	115.723	169.959	136.285
FBgn0000615	222.65	427.424	7.69467	0.662626	3.45202	0.577401	2.00666	1.08468
FBgn0000617	12.6193	3.52575	12.5417	3.49296	13.0207	6.34119	3.5437	3.59091
FBgn0000618	1.40476	1.40532	1.97015	2.86174	1.40709	1.40473	1.40658	1.40993
FBgn0000629	56.1943	3.87987	38.4135	2.22669	50.2748	53.705	76.457	3.18692
FBgn0000633	47.2255	95.8403	14.0956	71.7649	30.5436	20.4385	241.574	48.705
FBgn0000635	436.339	293.822	776.715	1506.1	703.662	672.692	1186.59	543.502
FBgn0000636	373.993	737.848	1573.36	2626	1411.57	7253.71	5725.21	5308.78
FBgn0000639	34.2496	484.965	0.299757	0.208455	1.64003	0.36794	1.51298	0.76847
FBgn0000644	754.117	3.44867	257.56	523.995	268.169	228.113	531.693	313.473
FBgn0000658	3.37118	1.94448	2.66307	1.93746	5.10111	1.94265	1.94834	1.95849
FBgn0000659	4.69025	8.75909	1.61899	1.60948	1.6521	1.62776	1.64697	2.45013
FBgn0000662	86.2421	137.107	104.584	109.413	135.702	79.9836	177.952	7.94099
FBgn0000667	718.326	328.573	601.518	692.314	954.556	491.485	462.383	542.608
FBgn0000709	216.067	254.971	164.274	215.345	272.062	181.886	122.436	253.858
FBgn0000711	121.483	109.28	115.518	175.036	94.736	219.561	528.57	277.745
FBgn0000719	306.628	428.816	217.73	244.803	297.673	794.201	607.384	263.189
FBgn0000721	659.949	500.07	956.472	910.875	781.501	822.432	466.503	1418.99
FBgn0000723	93.3411	372.929	266.521	591.545	255.881	192.549	126.918	235.307
FBgn0000810	158.628	171.873	469.511	314.666	397.854	192.99	442.428	537.092
FBgn0000826	9.08517	1.34613	1.32855	1.31725	1.36685	5.08628	1.36101	1.39747
FBgn0000927	373.513	447.729	41.9636	0.35011	3.70951	1.46193	0.872435	3.30659
FBgn0000928	2.29843	1.94958	3.76358	1.67516	1.68007	1.67719	1.67945	1.68354
FBgn0000964	333.411	144.508	683.448	379.432	1316.41	86.5456	179.255	338.659
FBgn0000996	252.037	166.867	164.641	12.232	96.0745	144.842	173.67	15.7882
FBgn0001075	3.8706	3.06593	10.5772	12.6347	3.09654	17.5264	3.78127	3.14438
FBgn0001078	1030.38	1249.68	1095.56	1575.94	1120.04	1694.39	1069.56	1703.09
FBgn0001079	43.8405	2.86196	56.755	48.0904	24.5526	88.4427	3.03418	8.23319
FBgn0001083	2.67842	3.3859	4.13537	4.13506	8.05852	33.1673	4.55935	46.1054
FBgn0001084	66.309	1.90477	27.0351	25.2102	2.07331	2.74312	59.9578	2.30728
FBgn0001085	139.77	25.7917	81.3688	248.991	58.8186	229.331	111.402	244.586
FBgn0001086	92.0061	1.43572	9.22289	1.16342	62.2493	21.9096	1.55768	3.86893
FBgn0001087	157.551	32.5443	95.8623	98.64	153.513	78.4785	4.88723	6.69974
FBgn0001089	2.27941	2.335	14.6471	24.9783	13.8982	32.6117	85.0832	2.7304
FBgn0001090	35.2762	3.0965	103.012	40.7406	104.632	112.105	114.35	29.6844
FBgn0001091	473.402	586.135	367.138	330.801	258.147	268.879	173.089	6.99895
FBgn0001092	590.814	796.472	330.775	279.147	428.402	924.278	367.552	777.979
FBgn0001098	580.183	804.509	749.352	323.287	713.599	111.56	151.466	463.234
FBgn0001099	2.47296	0.94661	0.900161	0.867762	0.99674	6.69528	20.3273	1.07165
FBgn0001104	372.073	155.943	146.518	319.153	87.885	125.277	269.576	7.04849
FBgn0001105	259.059	401.777	319.739	287.728	705.035	299.392	199.895	451.989
FBgn0001108	246.743	514.049	161.048	145.252	198.879	196.562	2.07592	5.93737
FBgn0001114	0.456563	0.481357	7.15922	0.366779	0.598108	0.455063	0.565123	140.694
FBgn0001120	362.034	297.863	7.74224	0.751374	10.9237	1.51472	2.21728	1.2414
FBgn0001122	82.7298	223.978	115.189	105.756	92.7747	21.7047	5.01637	207.835
FBgn0001123	34.8376	3.47381	62.5374	81.4521	67.4123	42.0064	83.4067	7.21847
FBgn0001124	82.206	463.497	121.361	0.76315	34.9751	36.9719	1.64882	92.7775
FBgn0001125	303.958	598.248	110.773	57.1131	81.3366	112.915	1.87426	5.50851
FBgn0001128	260.692	267.942	222.53	169.607	224.187	319.85	326.325	3.62982
FBgn0001133	37.5634	40.2561	20.4168	23.504	3.74448	37.8254	3.70564	3.95005
FBgn0001134	1.56613	1.18999	1.18971	1.20612	1.19035	1.49125	1.19025	1.19094
FBgn0001137	6.08369	2.84835	7.384	11.0297	3.39264	2.84365	2.85825	2.88433
FBgn0001138	8.01393	2.36246	2.61692	14.0393	3.68407	3.0959	4.04716	2.43561
FBgn0001139	212.616	230.59	109.787	111.22	85.27	121.289	4.36617	3.15533
FBgn0001142	66.1858	87.4389	74.9095	135.933	30.838	18.6208	5.10998	6.73585
FBgn0001145	89.0248	4.71336	42.0816	70.0289	5.70549	74.4311	64.6862	110.007
FBgn0001149	476.235	831.186	285.828	325.222	152.539	351.197	277.126	294.525
FBgn0001150	1.36458	1.3652	1.36364	1.67764	1.36713	2.68872	1.36658	1.3702
FBgn0001168	235.476	4.56821	196.709	391.703	120.308	545.159	1784.27	619.425
FBgn0001169	313.222	251.865	108.785	158.469	185.175	25.4459	2.42645	206.058
FBgn0001179	67.3348	3.29096	16.3478	34.0984	3.45669	36.2526	28.6833	6.02271
FBgn0001180	23.1411	2.6845	13.9548	1.94131	3.03692	9.22237	2.06696	2.17034
FBgn0001185	12.55	2.28316	7.08889	12.99	2.31267	2.27299	2.30426	2.35794
FBgn0001186	494.719	599.254	497.649	505.479	250.87	833.209	658.303	903.573
FBgn0001187	22.6396	1.63951	2.03217	28.0749	1.72175	16.6003	1.69893	1.83784
FBgn0001189	38.9886	4.06502	46.7305	48.2193	5.03925	52.7066	106.465	187.467
FBgn0001197	259.396	516.087	105.471	115.648	72.6678	66.1566	1.85025	2.55911
FBgn0001202	57.2305	3.62847	27.9206	39.3272	28.4343	22.371	41.312	136.162
FBgn0001206	40.7863	3.93316	16.2593	33.8403	32.5428	21.6909	5.33272	4.23791
FBgn0001208	4.99313	2.87002	2.99153	2.86297	6.213	5.78195	2.87394	2.88445
FBgn0001215	535.922	574.137	282.397	190.734	182.047	174.026	2.31698	126.981
FBgn0001218	1778.67	2371.69	4288.45	4438.54	7924.12	1919.63	1972.83	3711.9
FBgn0001220	675.255	795.022	252.067	157.493	256.456	252.806	137.329	6.70019
FBgn0001222	383.894	195.087	143.997	116.894	171.068	98.0638	2.05897	2.81693
FBgn0001223	33.1386	263.53	104.134	345.526	463.391	300.72	374.587	487.29
FBgn0001224	76.9937	560.758	221.939	890.451	424.936	208.454	518	1785.12
FBgn0001225	873.955	2884.7	781.817	1779.06	1017.71	982.699	2358.69	1015.87
FBgn0001226	922.42	1578.31	897.256	1193.88	680.976	468.545	1323.2	1987.39
FBgn0001227	8.70961	3.34203	7.32825	3.33033	3.79462	7.676	3.34853	3.36592
FBgn0001228	33.1386	263.53	104.134	345.526	463.391	300.72	374.587	487.29
FBgn0001229	35.2098	2.29034	64.214	3.90594	69.5448	9.33069	113.801	123.782
FBgn0001230	792.67	465.039	1072.28	2044.29	1643.16	1117.45	4738.08	2656.2
FBgn0001233	5898.44	5883.4	3679.93	4836.66	2759.53	3792.52	6138.42	1559.95
FBgn0001234	2837.73	4536.98	8347.1	11525.7	13104	18820.7	16137.2	21429.3
FBgn0001235	12.0991	10.6442	4.41746	5.17771	35.634	24.2306	57.6808	12.7524
FBgn0001247	183.945	3.31454	93.1323	161.55	63.8599	248.377	2.17403	199.466
FBgn0001248	379.882	329.372	383.183	310.618	501.295	166.238	115.618	10.2341
FBgn0001250	16.5637	3.11148	46.7201	5.20064	32.3229	58.0576	3.22154	13.6873
FBgn0001253	6.03895	3.03637	3.01124	2.99561	18.3416	13.9056	3.75395	6.09228
FBgn0001257	142.782	8.98365	793.575	1163.72	736.423	1021.01	1269.02	1491.22
FBgn0001258	2.31107	120.294	1.05993	23.6709	1.65014	156.441	37.744	201.697
FBgn0001259	1.02403	1.05263	0.97662	5.54177	1.133	21.0758	28.9471	1.24003
FBgn0001263	122.344	26.1965	49.8328	22.756	24.0492	29.6331	3.10517	3.5181
FBgn0001269	3.90199	82.1456	10.6872	59.8252	4.06705	48.9649	231.421	7.67194
FBgn0001276	1.44832	1.47005	7.62802	1.37566	2.47064	9.55932	24.7587	1.62351
FBgn0001280	21.6041	28.6324	14.9918	8.96684	3.1337	3.0594	3.11788	3.21953
FBgn0001291	73.8652	114.951	84.1158	51.2033	3.30481	84.2928	204.924	130.146
FBgn0001296	426.411	27.2474	570.206	353.805	741.938	248.695	183.006	654.251
FBgn0001297	476.224	895.016	2003.24	2595.27	1206.4	3341.76	3543.42	2132.34
FBgn0001301	177.639	362.506	116.061	189.096	124.994	163.125	227.321	7.25762
FBgn0001308	686.201	565.325	374.683	383.01	334.764	374.966	164.264	632.094
FBgn0001311	1.55831	1.55935	2.26388	1.60291	1.56261	3.49035	1.56168	1.56778
FBgn0001313	6.27572	3.52389	4.5587	7.67335	24.3965	6.24364	25.2035	5.12901
FBgn0001316	2139.93	1449.17	1648.64	1709.35	1436.79	1443.5	1175.79	1060.18
FBgn0001321	2.33734	2.34917	6.35005	5.91665	2.3855	6.86824	16.7558	2.44077
FBgn0001324	145.647	419.917	146.768	65.0471	192.992	59.8436	281.454	237.702
FBgn0001330	44.0443	38.3424	26.3583	28.6342	3.83914	10.7929	3.80296	6.16764
FBgn0001332	283.959	431.72	174.746	18.6476	2.04401	149.51	130.082	5.57655
FBgn0001341	301.754	134.37	23.233	31.5767	24.1501	5.66902	1.57194	2.05118
FBgn0001404	98.7431	232.553	138.801	251.902	6.51458	217.274	710.733	17.3484
FBgn0001491	15.0209	57.096	11.2266	3.07802	24.1652	34.7925	3.34625	5.66512
FBgn0001565	227.986	322.16	63.452	1.75568	39.8076	24.4266	1.7582	248.007
FBgn0001612	86.7074	183.8	18.748	72.7275	130.279	63.8796	79.4618	3.93423
FBgn0001624	350.781	121.795	417.951	580.373	570.647	437.937	521.477	6.93447
FBgn0001941	80.5315	156.735	201.134	429.026	86.7182	214.931	108.722	205.774
FBgn0001942	2235.58	2178.44	1994.7	1530.27	1952.53	1449.29	1576.17	1430.65
FBgn0001961	236.056	263.078	222.906	130.055	195.331	128.893	308.243	764.327
FBgn0001965	90.5874	291.684	128.874	101.54	162.49	95.5179	2.20794	2.93545
FBgn0001970	69.748	1.7173	24.9703	69.2472	112.487	1.61102	1.92086	103.592
FBgn0001974	21.4693	19.2306	9.24725	1.39205	1.56142	1.4686	1.54254	1.65723
FBgn0001977	46.6515	2.99922	31.4139	55.5012	34.5668	48.6141	3.14007	3.47699
FBgn0001978	302.509	800.416	108.582	93.1134	158.677	366.889	139.398	122.691
FBgn0001986	145.395	241.629	40.4464	0.776105	32.1795	31.9706	1.45775	1.901
FBgn0001987	85.0985	153.178	272.547	315.386	276.157	374.305	161.438	810.943
FBgn0001989	28.672	219.057	19.2458	0.827606	1.15251	0.984501	1.11957	1.31373
FBgn0001990	44.8554	55.5718	12.3613	28.218	27.2452	2.90263	3.06752	3.33483
FBgn0001991	4.71884	2.29074	3.80337	2.38051	2.86079	9.948	2.30315	3.1548
FBgn0001992	2.74525	2.75	6.50698	2.83787	10.5858	8.478	2.76064	2.78859
FBgn0001994	273.605	714.195	261.995	177.746	443.251	159.403	468.332	179.289
FBgn0001995	15.9107	3.0447	10.4321	8.42015	2.58705	2.54882	2.57892	2.63118
FBgn0002021	7.1423	1.69324	11.6479	18.2285	1.74269	1.67563	1.72883	1.8146
FBgn0002022	34.3039	1.81756	37.0269	1.94648	59.6081	1.76702	1.91726	12.3439
FBgn0002023	2.35037	2.38874	2.16979	2.38278	2.66352	3.20381	2.47397	2.1742
FBgn0002031	224.125	85.3664	63.6684	2.06444	64.0021	111.127	3.67615	2.48471
FBgn0002036	1.55194	1.55632	2.18192	7.34615	1.56982	3.03676	1.56598	1.59039
FBgn0002044	257.042	3.83708	219.136	110.708	177.337	205.336	324.461	246.368
FBgn0002069	397.157	87.363	154.157	159.158	273.288	408.673	271.678	13.3542
FBgn0002121	481.169	151.115	640.585	788.559	636.808	503.108	339.186	820.674
FBgn0002174	82.2632	3.28717	56.262	1.83672	34.8877	33.4807	2.28267	6.84873
FBgn0002183	496.862	358.203	156.664	18.182	65.4574	60.1906	32.3325	2.77549
FBgn0002283	32.6627	106.511	24.1382	1.47585	55.7825	2.88422	104.564	2.52572
FBgn0002284	134.521	95.7423	96.8674	90.0464	54.5728	74.9517	2.79919	3.44888
FBgn0002306	2.37945	61.7862	16.7713	29.6895	2.66739	25.8122	97.146	5.4048
FBgn0002354	7.87201	2.37598	5.07591	10.0249	2.39257	2.37033	2.38781	2.41855
FBgn0002413	722.351	667.448	236.007	179.408	210.923	327.939	277.295	10.0977
FBgn0002431	1064.56	363.878	482.513	203.561	664.881	263.764	126.054	408.792
FBgn0002441	334.081	177.586	312.083	231.441	110.485	354.343	205.623	251.372
FBgn0002466	50.5789	63.0851	9.40538	2.33809	37.6354	10.947	2.69202	5.18126
FBgn0002521	120.439	219.575	126.573	114.401	91.1943	81.6484	3.04893	123.921
FBgn0002524	76.3419	189	66.4383	3.85855	57.828	15.8828	2.1798	211.63
FBgn0002525	226.997	70.6161	86.4804	57.8933	45.6953	157.612	2.58952	9.08822
FBgn0002526	1750.19	1200.26	2223.13	1706.15	3193.56	528.056	273.494	1760.92
FBgn0002542	183.564	253.093	24.201	0.405352	0.914665	6.01836	0.86583	1.15256
FBgn0002543	133.002	118.358	38.5735	2.45855	55.6933	36.5552	2.23617	5.39848
FBgn0002552	54.2973	5.48594	51.2111	62.4477	80.4832	51.2767	4.93863	3.63899
FBgn0002562	7.95323	195.776	0.638543	0.585093	0.786807	0.681639	1.65711	0.988459
FBgn0002563	8.71399	432.394	0.524428	15.6862	0.772227	0.597761	0.730969	1.01034
FBgn0002564	4.95764	23.1629	1.86129	0.899318	1.84149	0.962095	1.01983	1.11547
FBgn0002565	5.99174	628.159	0.348313	0.550767	0.603777	0.408109	1.49089	0.796692
FBgn0002566	71.6558	84.5106	29.6028	106.157	27.5833	55.7923	8.60763	4.13271
FBgn0002567	216.977	529.387	296.28	264.216	234.612	257.278	201.315	351.26
FBgn0002577	49.1372	3.24777	20.0914	29.7583	31.9333	24.2005	118.647	6.53361
FBgn0002579	1262.11	316.861	904.739	389.678	562.241	490.791	10.0352	193.602
FBgn0002590	2493.96	1552.33	2249.83	1450.4	2253.82	1047.79	480.437	967.202
FBgn0002592	0.985408	10.3596	2.12982	0.957836	1.01843	2.32741	1.01156	1.05452
FBgn0002593	1337.89	1284.89	1269.4	1218.78	1832.11	688.915	329.182	1079.12
FBgn0002607	2242.3	2117.96	1527.22	1166.91	1678.65	1017.1	260.398	1163.13
FBgn0002609	14.9828	1.66941	2.71793	1.32612	1.24948	1.58827	1.24082	1.30051
FBgn0002622	1574.06	1982.78	1559.14	945.689	2176.91	618.045	920.437	1298.89
FBgn0002626	989.04	801.228	955.253	444.565	1294.48	410.016	2105.47	865.727
FBgn0002638	490.984	410.119	120.837	41.5137	82.9066	61.5375	7.31029	8.63222
FBgn0002641	15.044	90.398	20.369	79.9787	49.874	43.665	9.68717	4.17593
FBgn0002643	584.354	710.495	892.204	674.082	1055.34	1545.96	1746.06	1234
FBgn0002645	416.585	418.698	531.003	582.508	543.578	522.797	363.615	1020.06
FBgn0002673	63.246	91.0233	3.52259	28.2592	2.06334	13.2489	2.01256	4.52626
FBgn0002707	15.6243	3.24171	13.458	3.19994	3.2736	5.43123	3.26445	15.2366
FBgn0002709	101.845	1.36313	1.20095	3.13141	6.36155	35.6411	54.7583	1.76531
FBgn0002715	21.3351	51.7288	5.4632	63.0437	1.83881	1.65716	3.04338	2.02626
FBgn0002716	53.4083	81.0323	37.2698	20.0948	82.1702	34.602	3.42559	3.88157
FBgn0002719	319.218	162.51	584.954	614.455	313.295	1420.23	1526.42	1505.32
FBgn0002723	17.534	3.73938	23.7146	34.4842	36.9602	33.5209	3.82771	4.04837
FBgn0002733	31.0481	3.42866	130.009	133.477	65.9995	32.7431	5.55394	2.80543
FBgn0002736	54.1006	58.6329	39.6792	28.8767	3.03904	16.499	2.98828	3.3011
FBgn0002772	4.15418	19.0793	1.34354	1.51214	1.43837	9.9817	1.42435	1.50987
FBgn0002773	64.2305	2.32771	13.8409	49.6221	2.48327	30.6987	6.95817	2.70547
FBgn0002774	98.0006	251.395	82.4151	47.0361	49.9561	79.6742	100.46	3.88162
FBgn0002775	51.6621	3.41566	31.1348	34.8806	3.57575	29.9869	33.4278	3.81224
FBgn0002778	138.364	168.93	84.2354	46.3266	117.167	55.5886	4.93307	6.74848
FBgn0002780	1400.14	1035.47	299.386	160.035	328.883	143.667	295.255	3.21881
FBgn0002781	640.978	631.122	212.07	151.348	261.996	277.607	8.2003	89.6488
FBgn0002783	319.401	384.537	124.611	42.231	68.3391	79.3828	5.78373	5.92431
FBgn0002787	211.887	111.282	222.944	116.858	445.177	160.456	224.108	16.5164
FBgn0002789	2.42041	1.24111	1.54472	1.23977	1.24215	1.24076	1.24185	1.24384
FBgn0002791	73.5551	2.68221	26.5298	31.8816	56.4287	26.558	2.82404	3.15958
FBgn0002842	1.87883	1.8938	8.1836	16.3162	13.1209	1.87788	1.92627	2.00584
FBgn0002868	220.373	510.754	261.162	252.831	60.0032	791.063	900.521	499.518
FBgn0002872	38.2905	26.796	12.731	1.67436	1.82467	1.7392	1.80673	1.91976
FBgn0002873	306.882	584.387	9.29382	0.28322	3.36736	1.28404	0.718755	1.03235
FBgn0002878	144.977	177.797	12.7841	32.0469	2.77279	0.957422	1.19779	1.53968
FBgn0002887	31.6506	106.209	80.5952	90.934	9.46277	104.409	8.89519	22.9958
FBgn0002891	43.8319	204.641	61.5889	58.7343	65.7162	96.9287	2.8802	212.695
FBgn0002899	8.90991	2.3142	2.80555	12.7494	2.34106	6.06963	2.3334	2.38237
FBgn0002901	7.82749	22.8563	5.03094	1.52117	1.66022	3.99027	1.64438	1.74165
FBgn0002905	197.856	307.786	16.8036	54.2819	75.6809	71.5668	2.30642	248.172
FBgn0002906	36.547	70.1173	28.1972	58.714	32.7029	10.2723	3.63264	3.9919
FBgn0002909	23.2531	10.0828	16.4126	21.8822	4.43363	14.2609	4.4176	4.52126
FBgn0002914	136.891	178.571	85.1721	54.9073	51.0331	47.1765	5.09246	9.62892
FBgn0002921	908.228	1140.65	1784.04	1133.59	1965.55	1771.52	2061.3	2047.3
FBgn0002924	94.1028	207.758	25.1887	65.8386	1.80604	33.6429	1.72876	2.18864
FBgn0002926	743.198	210.784	4407.91	3921.78	10223.7	878.959	805.476	2210.67
FBgn0002930	2.31931	1.51861	1.51669	1.51551	1.52101	3.18256	1.52032	1.52484
FBgn0002931	1.42164	1.43537	8.34634	1.37663	1.4762	3.67514	15.7703	1.53503
FBgn0002932	108.409	100.466	113.997	305.142	88.6796	96.2456	259.711	10.5407
FBgn0002936	8.18482	2.01088	16.2912	1.87382	2.10666	11.277	59.5685	3.97642
FBgn0002938	2.11875	2.12159	5.15465	6.5465	2.13051	2.34185	2.12794	2.75531
FBgn0002941	1.48971	1.49621	1.4796	9.23163	1.51599	4.55271	2.00746	1.5456
FBgn0002945	143.017	443.492	361.069	685.214	403.763	279.5	221.046	216.963
FBgn0002948	58.8152	179.777	0.864778	0.765616	2.41186	12.0536	1.09403	1.30699
FBgn0002962	171.611	62.5301	25.4579	0.596404	1.06881	2.38189	1.02346	3.24147
FBgn0002973	159.872	175.41	192.547	294.149	135.502	148.708	2.34641	9.21993
FBgn0002985	2.63816	2.22998	2.50938	4.1083	2.23326	4.3509	2.23231	2.23856
FBgn0002989	19.1497	24.4402	0.594609	0.546457	0.720153	0.632731	0.703196	0.830928
FBgn0003002	14.0489	66.0188	5.07998	35.3151	46.1233	20.4146	108.882	15.6539
FBgn0003008	17.18	3.50566	13.5424	18.3425	9.34344	3.49212	3.534	3.60757
FBgn0003009	4.6077	1.59307	1.58812	1.58504	1.59917	2.81154	1.59742	1.6087
FBgn0003015	896.861	894.227	42.2684	0.383279	4.22507	54.323	1.07678	12.6777
FBgn0003016	611.143	411.891	1015.48	873.279	703.74	553.469	434.317	1227.55
FBgn0003023	568.985	1156.84	67.3096	67.2349	33.6048	167.444	7.31653	281.849
FBgn0003028	516.317	562.736	74.0188	33.7547	35.9235	92.2131	8.75505	20.9537
FBgn0003041	97.4661	105.084	22.3639	12.1812	4.72472	7.07829	93.8634	8.27333
FBgn0003042	40.2779	5.88878	32.0078	34.6759	3.40351	29.6955	4.674	3.59047
FBgn0003044	119.917	93.1736	73.149	45.9995	43.4661	13.004	2.75197	3.27244
FBgn0003048	398.558	153.814	414.752	305.106	283.63	504.508	536.219	466.859
FBgn0003053	531.63	300.512	1153.53	914.535	1038.37	1165.77	1602.31	1158.57
FBgn0003062	1564.02	718.509	356.204	86.6364	231.613	87.0364	9.96891	2.64544
FBgn0003067	25.1853	3.42397	39.8201	60.1931	39.0193	40.7128	92.3898	4.05131
FBgn0003068	61.6925	2.15026	96.8142	138.123	63.9866	228.914	129.737	6.25469
FBgn0003071	127.666	335.29	115.941	76.3717	82.364	175.715	100.619	7.30633
FBgn0003074	290.156	304.173	128.778	92.4319	135.504	157.25	4.12199	2.98222
FBgn0003076	170.652	96.5377	71.1494	79.6113	36.0947	16.3044	2.44123	3.01099
FBgn0003079	120.148	182.495	96.6808	283.908	72.0773	109.178	4.8595	305.239
FBgn0003089	24.6927	1.61888	146.993	131.439	147.419	53.9892	3.54726	2.36699
FBgn0003090	66.8294	127.444	52.7299	102.009	37.0996	69.3716	217.257	407.093
FBgn0003091	0.854483	4.12266	52.9564	80.6801	1.257	248.839	803.736	8.55391
FBgn0003093	158.868	4.4269	100.163	51.0703	140.042	195.175	108.507	119.216
FBgn0003116	26.2998	0.936762	0.854369	0.793687	1.02191	5.30384	29.8521	1.13605
FBgn0003118	75.9953	5.20059	206.384	190.654	15.841	192.917	191.168	262.623
FBgn0003124	203.923	377.53	13.146	0.38968	0.954112	41.6596	0.899244	1.22201
FBgn0003129	10.8095	8.71879	19.1714	57.4695	8.56842	6.82601	33.3102	22.248
FBgn0003130	1.55103	1.55141	1.55047	2.60011	1.71371	2.14853	1.55225	1.55451
FBgn0003134	126.21	85.8827	97.7552	55.1408	5.86496	69.5361	144.632	15.399
FBgn0003137	55.8704	0.981827	67.4081	0.702309	1.14116	96.3957	1.09828	3.26786
FBgn0003139	79.5449	152.652	36.7698	0.974482	1.58397	30.0887	1.52285	6.14091
FBgn0003141	108.196	78.0839	63.8366	2.04893	140.397	59.9116	7.10422	2.86626
FBgn0003149	428.458	3.17561	69.9919	262.6	71.4274	416.995	937.017	133.95
FBgn0003159	1071.58	240.266	557.773	616.774	323.326	1050.09	1287.19	608.193
FBgn0003162	25.4868	2.21294	53.5606	7.30058	2.40207	43.9943	75.4371	2.66772
FBgn0003165	1473.71	1538.42	1286.98	1403.04	1260.78	1128.06	1530.92	1593.39
FBgn0003169	98.4379	97.2617	78.8915	102.819	87.0017	61.7222	117.041	8.47466
FBgn0003174	83.0971	1.55913	101.13	126.847	46.3155	431.425	269.436	2.56295
FBgn0003175	419.417	1095.92	928.393	1315.15	609.564	626.177	308.342	799.307
FBgn0003187	79.0298	99.6686	24.1261	2.07441	2.45153	27.3863	62.9578	176.287
FBgn0003189	601.392	504.825	171.526	156.776	159.197	115.318	5.73076	5.97544
FBgn0003204	389.326	347.667	107.378	89.1458	118.663	82.4342	6.63988	112.863
FBgn0003205	106.949	1.81817	69.915	104.163	90.7244	87.8367	2.04964	2.56777
FBgn0003206	11.2404	2.99256	27.639	3.81087	31.2244	22.5215	3.05083	3.19683
FBgn0003209	239.149	270.9	215.57	342.983	65.1009	638.534	1236.78	190.892
FBgn0003210	66.7968	1.35244	91.8548	0.839599	68.4194	61.93	1.56888	239.826
FBgn0003218	208.408	156.487	252.249	478.658	272.441	259.085	248.349	395.322
FBgn0003227	20.6656	2.57296	6.81597	1.87944	2.0054	12.0591	2.81003	2.0825
FBgn0003231	203.518	924.639	393.781	777.74	285.371	598.336	905.788	22.3796
FBgn0003250	6.39943	6.19205	23.8385	19.7814	71.8703	37.4551	3.492	9.54164
FBgn0003254	2.91775	2.91942	2.91524	5.03384	3.26393	5.98212	5.5689	2.9332
FBgn0003255	1.82117	1.82867	1.80954	1.79743	2.94802	8.7287	9.1437	1.88647
FBgn0003256	184.054	176.484	573.145	354.601	705.716	382.665	1031.53	382.104
FBgn0003257	147.987	198.78	95.99	91.719	55.0865	37.0111	97.5762	3.95517
FBgn0003261	2492.37	2299.34	1307.9	1345.79	1132.99	1846.92	1047.66	895.259
FBgn0003268	66.3727	61.0172	29.7103	80.5982	4.95877	21.2723	3.07938	6.07601
FBgn0003274	2012.55	1817.14	1567.13	1149.23	2051.88	871.606	438.235	685.192
FBgn0003275	14.293	2.01321	7.411	1.9613	12.1941	2.00003	2.04028	2.10758
FBgn0003277	1086.54	1374.85	326.649	495.928	280.284	462.94	53.7461	1191.65
FBgn0003278	67.0015	132.402	30.3094	1.29663	14.4281	7.37404	1.80745	4.45732
FBgn0003279	3928.45	5181.06	3503.57	3014.25	4969.98	1428.89	951.522	2397.02
FBgn0003285	59.002	15.4256	15.473	9.22569	27.4538	41.7761	20.1755	31.1008
FBgn0003295	9.48228	3.57458	4.93909	25.8584	4.62967	21.9928	11.163	3.71247
FBgn0003301	12.3982	230.963	140.742	38.8628	65.1986	723.97	395.905	357.453
FBgn0003308	2.18171	20.6999	10.0584	19.8299	2.25047	2.18063	3.07838	2.32784
FBgn0003310	402.799	126.578	207.851	536.685	36.4887	269.585	432.058	473.963
FBgn0003312	9.98926	3.1698	18.771	39.3419	45.5871	22.9536	3.25751	3.4735
FBgn0003317	168.653	91.8203	91.6005	147.722	43.3541	87.7194	194.512	125.216
FBgn0003321	185.212	3.59576	163.546	129.549	225.467	226.189	407.807	519.808
FBgn0003326	15.9621	6.92889	5.29751	44.2565	9.29173	24.212	47.833	10.1412
FBgn0003328	459.957	226.59	1220.65	1641.97	791.743	2435.24	3294.74	1056.1
FBgn0003330	4.08631	2.92814	4.53417	2.92499	2.93062	5.26991	2.9299	2.93465
FBgn0003334	120.026	87.2087	83.8646	73.5077	138.032	59.6141	53.0821	4.50885
FBgn0003345	220.943	280.696	624.432	943.218	607.285	661.481	1557.02	622.904
FBgn0003346	161.856	275.007	86.9246	42.9443	100.123	44.3668	2.51202	272.356
FBgn0003353	43.0635	54.1761	14.4176	43.2972	36.7099	3.99778	3.23492	3.53812
FBgn0003357	4.17837	21.8671	0.900229	0.871863	1.71594	0.924613	0.973435	1.07251
FBgn0003358	1.52467	7.62911	1.51654	1.50807	1.54595	5.09959	1.5414	1.5702
FBgn0003360	1598.98	2446.48	1671.86	775.108	2134.89	607.202	270.007	794.82
FBgn0003366	100.396	2.15942	215.845	137.521	15.4839	127.092	177.705	196.505
FBgn0003371	872.871	765.125	1018.61	1824.27	798.547	1563.02	1315.62	1118.82
FBgn0003380	19.5572	121.088	13.2863	120.726	53.8595	143.374	149.923	440.969
FBgn0003382	2.26278	2.55118	2.03176	2.0272	6.32648	2.03603	4.93537	2.06256
FBgn0003386	20.4448	4.41087	14.0569	27.6711	49.0376	4.18539	53.4971	3.71918
FBgn0003388	2.02279	1.32171	21.1137	1.45224	63.35	30.9341	1.40315	1.58766
FBgn0003390	11.9762	125.164	24.284	14.7516	3.83265	32.7294	2.25512	2.54402
FBgn0003391	691.251	512.486	969.842	737.664	934.783	1474.9	1066.85	2016.36
FBgn0003392	250.656	447.549	252.302	297.43	171.841	178.55	235.383	221.31
FBgn0003396	392.698	531.864	650.734	947.542	485.981	934.853	1121.38	984.334
FBgn0003401	31.077	66.245	15.0663	38.723	2.39427	4.45247	2.35326	2.6045
FBgn0003410	78.5712	408.79	94.8384	91.6814	69.9169	40.4981	312.184	3.20381
FBgn0003411	7.71301	2.85748	22.2201	26.6786	2.93492	33.2282	3.9607	3.05242
FBgn0003415	505.958	1274.88	407.984	500.361	343.195	285.046	417.86	160.875
FBgn0003416	113.425	2.14423	46.2042	32.6747	33.7905	19.8241	2.30421	2.67137
FBgn0003423	310.547	419.728	227.45	306.109	157.299	198.543	173.368	158.024
FBgn0003429	31.5723	80.2208	5.85208	145.312	73.5297	62.5095	84.6501	467.622
FBgn0003435	838.072	394.55	2021.56	2161.24	1815.37	2048.78	2356.61	2192.91
FBgn0003444	39.3183	25.6694	15.9919	3.57555	13.7942	12.2853	3.74604	3.89718
FBgn0003447	138.593	256.384	124.976	146.534	144.887	124.433	6.70604	9.80721
FBgn0003449	23.3735	34.8685	26.0351	2.67016	2.89183	18.3248	2.86561	3.03023
FBgn0003459	218.444	1.68343	30.4163	1.07987	87.7423	30.3325	58.7591	167.469
FBgn0003460	10.2784	2.88406	2.24208	1.26151	1.48777	2.04732	233.536	3.26261
FBgn0003462	163.464	2.93426	94.3403	50.1321	192.818	66.4212	1.85119	2.39688
FBgn0003463	163.746	107.889	98.523	125.94	173.544	464.268	262.267	187.353
FBgn0003464	176.231	272.047	89.2223	45.6055	18.0679	3.25587	1.59142	2.10008
FBgn0003475	224.851	213.215	294.628	242.792	186.347	327.974	239.473	41.7142
FBgn0003479	11.5151	2.59902	4.68684	2.57983	7.77542	2.59403	3.09875	2.63702
FBgn0003480	16.2667	0.654079	6.44293	0.460313	0.777934	0.611947	0.732232	426.405
FBgn0003483	123.06	183.878	74.7596	60.8842	41.0814	4.41044	7.48082	6.00093
FBgn0003486	6.0699	1.38312	38.7656	20.0695	93.0118	1.33073	1.48411	1.70961
FBgn0003495	39.1618	1.66628	13.301	1.7129	13.2185	117.695	120.427	4.65557
FBgn0003499	10.1039	9.44021	6.83859	14.554	22.9812	15.4834	11.2473	23.816
FBgn0003502	342.495	31.2547	701.195	713.328	552.279	736.07	472.461	678.802
FBgn0003507	120.483	147.481	475.363	242.431	374.908	749.426	754.453	402.682
FBgn0003512	29.161	39.4352	23.8868	36.7497	2.58801	2.42109	2.55359	2.76628
FBgn0003513	1.65066	1.65144	2.11005	1.64828	1.65391	4.06332	2.04715	1.65788
FBgn0003514	272.925	444.779	446.223	638.113	494.113	475.692	274.62	773.143
FBgn0003515	5.17926	1.77645	1.76838	1.76335	1.78633	5.68098	1.7835	1.80168
FBgn0003517	6373.08	3259.68	3912.24	955.109	3382.59	1038.86	377.73	1557.48
FBgn0003520	170.034	353.66	110.045	189.466	123.277	68.3279	288.576	273.634
FBgn0003525	131.494	65.5397	37.9178	43.4889	41.2888	4.35306	80.9303	7.02473
FBgn0003527	4.00246	1.67483	2.65393	1.66941	1.67899	1.82291	1.67779	1.68556
FBgn0003545	4.51598	2.48733	4.25909	2.48117	5.35521	2.48572	2.49074	2.49986
FBgn0003557	459.519	693.866	415.121	277.429	303.003	411.158	740.589	370.794
FBgn0003559	30.1633	135.315	44.7157	46.2102	48.1404	51.7792	109.539	8.08178
FBgn0003567	148.9	317.907	125.7	122.261	156.006	61.4731	64.964	3.65154
FBgn0003575	132.356	281.261	246.063	88.3887	96.3399	359.232	341.225	529.62
FBgn0003598	254.277	235.551	65.6187	1.95801	45.036	18.4588	146.141	2.55678
FBgn0003607	338.904	260.609	75.7949	41.3912	35.4252	30.222	1.79002	2.4008
FBgn0003612	295.94	212.326	98.6268	189.911	56.1367	35.9984	155.439	10.1897
FBgn0003638	438.431	424.249	254.786	43.663	151.519	150.923	4.44071	136.848
FBgn0003651	1.99718	2.34592	1.9896	7.82578	2.01738	6.90318	2.47622	2.04102
FBgn0003654	55.7703	4.7	119.643	97.3505	42.9777	62.9488	2.40269	2.89986
FBgn0003655	281.971	688.192	1.91135	39.2906	2.7235	25.3166	1.08993	3.83101
FBgn0003656	343.632	492.324	405.139	301.158	553.45	814.211	720.09	218.727
FBgn0003660	92.9219	201.758	131.673	255.994	24.1303	138.684	67.7956	58.1011
FBgn0003676	773.231	577.398	336.017	288.578	104.522	87.6824	146.2	6.53917
FBgn0003687	35.8288	66.4809	19.1373	26.6898	30.0169	2.92282	3.09908	3.38324
FBgn0003701	27.3012	23.8906	0.637613	0.58227	0.781925	1.24158	0.762656	0.900739
FBgn0003710	6.76287	2.35661	2.35156	2.34847	2.36293	3.53085	4.88247	2.37306
FBgn0003714	23.4952	2.64137	9.40399	17.7124	2.68691	4.74041	2.67395	2.7565
FBgn0003716	286.78	273.916	320.231	353.651	525.928	228.558	760.284	603.019
FBgn0003721	1131.72	935.38	1279.98	1821.12	1262.23	878.544	1048.1	496.957
FBgn0003731	877.544	373.493	1056.97	1814	1405.46	1454.73	712.293	838.6
FBgn0003732	813.187	2055.89	284.485	202.317	369.818	66.0877	203.074	200.668
FBgn0003733	22.0971	1.1007	2.4742	1.02062	1.97522	3.53391	1.89505	1.22485
FBgn0003741	6.43541	3.61556	12.5456	15.8195	29.8065	11.6474	3.65539	3.75757
FBgn0003742	11.7877	4.53612	9.14469	9.47764	12.051	4.45298	4.1296	4.16689
FBgn0003744	153.892	36.1495	107.978	116.886	70.0654	128.543	169.013	3.97691
FBgn0003747	1.38744	9.03778	1.37653	1.36504	1.41556	5.69383	1.4096	1.44687
FBgn0003748	580.78	311.446	433.905	306.543	271.712	1290.23	1417.93	953.436
FBgn0003862	570.145	1069.74	358.928	593.277	354.998	470.901	243.187	472.094
FBgn0003866	13.439	3.85128	7.8359	3.83046	3.86752	13.3532	3.86283	6.40203
FBgn0003867	14.0528	3.04132	10.5994	25.0667	3.08578	7.99834	3.07309	3.15439
FBgn0003870	1146.36	628.455	1999.41	2274.17	2381.79	1525.17	1835.08	3166.2
FBgn0003882	45.7656	81.8372	52.84	1.27784	1.99231	25.4142	145.024	2.35492
FBgn0003884	1970.6	1392.81	2035.29	1545.22	1897.08	1016.45	1138.68	999.496
FBgn0003885	196.928	123.088	94.4333	50.8757	63.548	93.7423	2.47953	3.14511
FBgn0003887	1424.95	2165.68	1098.28	666.488	1644.07	284.289	12.1438	716.768
FBgn0003888	709.35	340.56	1281.77	1116.22	1904.25	1463.63	587.361	689.542
FBgn0003890	122.16	52.6529	258.396	429.407	180.162	94.1238	257.536	10.1071
FBgn0003891	598.137	1099.65	608.59	584.177	797.658	491.196	1377.84	1027.75
FBgn0003892	79.2422	59.6764	15.9356	1.87468	49.5005	2.1849	91.207	7.6746
FBgn0003896	10.7606	4.826	3.60455	3.03276	39.138	8.13845	14.1773	43.2279
FBgn0003900	34.7601	2.65883	6.19102	2.56159	3.81698	15.4861	19.8867	2.83507
FBgn0003930	1.88874	1.74853	2.39123	1.74407	1.75199	4.00694	1.75099	2.14505
FBgn0003941	1072.2	1209.75	910.215	466.189	748.192	274.951	344.349	10.2459
FBgn0003942	1170.36	1453.38	916.496	538.98	1461.96	549.221	843.178	10.5434
FBgn0003943	381.819	378.885	808.903	615.138	516.416	1141.89	393.859	1626.37
FBgn0003944	7.70435	6.86475	5.68743	34.917	4.25238	4.23914	4.91935	8.11395
FBgn0003950	12.2615	2.98894	1.88077	1.85575	1.96536	5.75484	17.5899	2.03301
FBgn0003963	790.076	456.73	2137.73	1919.48	1437.63	1773.09	3656.96	2626.48
FBgn0003964	274.123	112.511	119.827	137.798	154.522	107.698	158.284	3.84441
FBgn0003969	153.083	127.438	99.5286	95.6583	111.575	132.627	191.424	415.512
FBgn0003975	2.17271	2.18009	2.16132	11.0629	3.80794	7.71422	2.1964	3.15468
FBgn0003977	145.745	354.624	115.995	63.0783	101.832	53.4545	2.27893	8.80623
FBgn0003978	8.62448	1.37323	2.55571	1.45606	1.38913	1.36767	1.38464	1.41351
FBgn0003979	11172	436.554	15664.7	12589	25993	4860.3	5207.99	18434.1
FBgn0003980	3157.19	540.541	14558.1	6500.98	16305.6	2552.24	572.918	9537.92
FBgn0003983	12571.9	572.23	12599.1	8838.75	14032.6	4122.68	3681.19	15048.2
FBgn0003984	22.3096	154.189	92.6976	230.435	131.97	358.373	204.932	26.4924
FBgn0003996	173.337	1.80591	628.281	653.903	649.76	462.578	511.568	1604.87
FBgn0003997	61.1754	167.799	177.763	216.204	57.2146	304.048	240.552	7.07924
FBgn0004003	31.8716	1.75777	71.3314	36.7614	143.307	1.65367	79.6759	2.40493
FBgn0004028	30.634	3.73386	7.28699	2.93005	6.49456	15.7649	65.6987	6.73811
FBgn0004045	4788.22	709.295	14800.4	11070.6	39910.1	4656.71	715.328	15870.7
FBgn0004047	1434.84	1186.93	4840.19	4829.93	13983.7	1473.95	269.754	6613.08
FBgn0004049	200.05	256.712	84.4409	134.462	2.29381	91.1388	4.08235	275.265
FBgn0004050	124.424	7.7991	50.2796	88.758	60.75	9.4776	129.047	6.62469
FBgn0004055	27.7215	58.1303	16.5438	28.8826	5.65162	20.9756	6.65099	4.36604
FBgn0004057	53.8087	73.491	50.0668	41.4941	4.93098	60.533	3.01926	3.43699
FBgn0004066	76.558	49.5982	73.1554	10.1063	20.8714	29.074	3.1951	3.58542
FBgn0004087	4.33732	3.10284	5.61229	3.32553	3.10565	4.91172	3.10484	3.11023
FBgn0004101	146.949	246.773	58.8093	140.468	64.3173	110.092	10.9255	192.994
FBgn0004103	457.556	479.349	357.78	246.668	458.64	262.384	564.8	367.867
FBgn0004106	22.9617	1.78653	9.7601	24.2415	1.85854	2.87278	1.83844	1.96192
FBgn0004107	47.1397	33.3211	6.76068	1.76236	2.02117	16.7003	1.99213	2.16969
FBgn0004108	47.0916	4.51339	42.9848	53.2646	35.7508	33.8608	3.46663	3.79884
FBgn0004117	53.4768	1.71572	1.60946	43.629	3.13335	26.2485	1.80238	3.85973
FBgn0004132	13.8459	17.946	40.9187	59.5658	68.2163	54.9472	8.03776	92.5934
FBgn0004133	148.28	15.3916	407.57	401.068	310.413	482.059	932.367	306.479
FBgn0004167	1648.16	1122.75	1073.87	605.004	767.861	1411.13	1130.63	1615.61
FBgn0004168	2.14642	2.45039	2.14515	2.14387	3.54316	3.98713	2.14913	2.52474
FBgn0004169	197.063	4.26346	2.9504	1.34434	68.4011	45.8579	2.89193	6.05701
FBgn0004177	438.587	771.847	343.787	398.983	538.406	291.075	377.521	746.109
FBgn0004179	99.0092	222.173	80.7945	84.1022	64.4572	32.5161	2.64701	271.101
FBgn0004197	3.72579	3.81835	3.72602	8.26287	3.29053	6.7843	4.34795	3.95573
FBgn0004198	436.095	186.648	489.153	787.743	490.784	277.74	798.649	446.335
FBgn0004227	171.029	160.223	208.503	126.134	300.983	20.493	126.339	6.96569
FBgn0004237	935.517	606.385	571.442	358.808	433.072	191.102	122.898	195.546
FBgn0004242	5.10733	5.10989	7.12747	11.0296	7.55406	7.99912	8.29795	6.45686
FBgn0004244	8.73159	6.22344	7.43854	4.81837	6.29371	6.88052	5.46087	6.58263
FBgn0004359	227.093	6.2719	150.658	183.321	120.416	146.165	4.43273	260.325
FBgn0004360	7.69507	63.4929	9.84615	61.2529	2.01531	3.33376	1.97881	4.17413
FBgn0004362	613.753	181.654	116.385	49.9336	182.49	53.4044	3.87005	8.50308
FBgn0004363	606.782	1595.5	464.416	254.345	639.591	174.833	260.787	462.909
FBgn0004364	239.842	4.48504	565.647	705.778	829.615	294.69	378.774	12.0019
FBgn0004367	109.127	152.612	18.92	1.97507	38.2418	12.9438	94.7362	2.74111
FBgn0004368	490.816	258.14	307.21	425.517	381.944	373.641	322.865	652.666
FBgn0004369	244.978	228.107	285.561	325.96	353.895	340.036	171.847	339.128
FBgn0004370	520.15	209.934	679.113	1067.83	531.426	889.29	647.801	543.482
FBgn0004373	215.567	332.211	585.062	384.76	610.898	805.747	605.561	550.076
FBgn0004374	443.81	261.359	164.702	188.689	262.805	525.845	344.793	620.011
FBgn0004378	18.7394	24.9247	9.69038	1.26708	1.45335	1.35228	1.43295	1.55587
FBgn0004379	59.2533	107.557	7.74586	0.988661	20.9477	1.20948	1.39784	3.68305
FBgn0004380	15.4353	3.60541	8.95899	15.6798	3.6418	15.7203	3.63136	3.69895
FBgn0004381	61.4378	94.1946	36.2211	46.6997	22.961	29.3952	50.2336	5.21843
FBgn0004387	171.855	417.55	159.031	423.151	221.499	184.741	164.605	841.405
FBgn0004390	356.892	543.008	200.061	246.647	295.168	318.424	312.994	16.6334
FBgn0004391	167.899	154.278	83.1465	55.5122	67.3028	3.05099	4.06937	5.67136
FBgn0004394	2.33768	3.28849	2.05011	1.39032	31.1207	2.32635	116.581	15.1989
FBgn0004395	132.636	271.895	63.7664	130.442	137.744	343.387	241.141	289.329
FBgn0004396	221.857	12.5584	605.489	783.897	1118.75	288.63	512.723	93.2628
FBgn0004397	415.466	381.914	631.126	703.254	294.472	523.796	760.289	722.081
FBgn0004400	27.1849	2.74235	10.0521	2.64489	31.8641	15.7955	2.79373	2.92308
FBgn0004401	842.739	1117.12	569.677	539.155	560.219	245.49	145.115	491.492
FBgn0004403	718.75	623.974	389.029	246.374	979.585	334.207	357.351	678.984
FBgn0004404	358.768	238.254	189.148	70.5492	224.372	152.721	126.003	257.282
FBgn0004406	38.6748	1.99269	14.6994	89.6182	2.21891	24.7145	90.6787	2.53026
FBgn0004407	29.8683	58.8613	19.868	18.4161	3.31823	15.5206	3.28273	3.50573
FBgn0004414	3.44462	1.58786	2.43505	1.63009	1.59083	1.58685	1.58997	1.59555
FBgn0004419	1163.59	1980.24	175.626	152.148	115.345	87.7823	1.57832	2.33664
FBgn0004432	813.465	1328.72	482.709	352.686	299.311	259.592	5.78844	14.8038
FBgn0004435	194.953	250.024	146.991	193.042	178.149	130.827	9.95805	6.75723
FBgn0004436	80.5503	190.095	91.6233	160.904	24.5275	126.689	256.691	99.0425
FBgn0004449	469.85	157.755	485.654	660.561	515.714	948.861	523.825	399.235
FBgn0004456	394.39	1030.67	721.55	889.534	682.695	500.613	490.683	1021.46
FBgn0004462	191.581	384.348	149.342	254.618	287.624	318.86	578.062	249.507
FBgn0004463	93.9534	50.2549	20.4404	0.959601	1.35867	5.93659	1.3183	1.55624
FBgn0004465	62.3855	66.4215	43.9678	43.1953	37.1962	27.0406	4.05192	4.46618
FBgn0004507	568.525	785.38	224.225	107.964	100.064	149.1	129.197	283.558
FBgn0004509	466.19	1094.73	1212.39	2336.07	1141.09	2443.26	3186.81	2444.34
FBgn0004510	38.8871	49.2582	22.8396	3.44894	31.9879	20.8919	5.14736	4.00377
FBgn0004512	0.689652	0.722713	2.97543	0.567145	0.852616	822.939	1.80682	2.52174
FBgn0004513	12.0765	2.7165	13.4131	65.9423	27.1358	32.5255	2.8182	3.06353
FBgn0004514	1.3458	2.22426	6.49406	1.78262	2.67797	10.7594	1.45386	226.275
FBgn0004556	21.505	117.098	12.7467	1.62482	1.90505	8.74077	1.8739	2.06364
FBgn0004569	76.6923	2.02349	69.1921	99.4801	35.4546	221.754	176.163	367.301
FBgn0004573	1.16376	1.76773	1.49806	17.4373	1.23509	13.9189	1.22047	1.30844
FBgn0004574	80.5674	63.0123	59.2358	4.53851	97.3279	68.6015	119.882	98.3345
FBgn0004575	4.97754	2.77016	16.2516	50.6195	84.5107	84.3252	82.588	91.5476
FBgn0004577	20.8061	15.8891	16.7631	32.2555	6.42739	17.7365	7.44337	61.4311
FBgn0004581	130.008	91.0385	27.2016	24.6316	3.88819	15.9336	2.0889	2.49035
FBgn0004583	327.308	209.226	235.279	449.689	211.305	389.476	680.884	3.47819
FBgn0004584	44.3414	21.3273	21.6612	2.41363	2.89376	29.21	90.1711	5.55368
FBgn0004587	282.527	186.105	262.597	317.319	451.661	27.9934	313.858	18.8038
FBgn0004595	40.2044	73.0626	6.9811	3.69887	8.11075	3.19364	9.65982	102.457
FBgn0004597	4.75692	1.63873	3.09012	1.63028	1.64515	1.63655	1.64331	1.65519
FBgn0004598	416.563	355.224	720.893	631.191	376.72	451.124	555.784	7.04751
FBgn0004606	95.7651	115.067	28.8228	37.3991	47.9307	8.51	28.3103	39.2443
FBgn0004607	16.2404	316.335	23.6722	74.2929	2.31124	56.9564	121.594	265.896
FBgn0004611	215.443	186.619	311.064	454.97	116.149	454.34	618.464	6.84954
FBgn0004618	0.792653	4.94605	0.754269	172.685	0.881548	0.791151	0.86304	2.31074
FBgn0004622	1.89551	1.9003	2.08398	7.99943	1.91515	5.1458	1.91091	2.66931
FBgn0004629	5.71953	1.82843	39.1858	56.8323	49.2113	113.141	229.934	5.36918
FBgn0004635	41.0994	1.59529	70.0965	120.218	10.4983	164.682	1.80278	4.8
FBgn0004636	217.372	245.379	176.88	264.642	206.672	290.458	66.0474	486.363
FBgn0004638	116.127	212.904	150.696	357.751	211.127	296.93	208.758	471.248
FBgn0004643	162.402	0.827728	52.075	0.569014	0.971595	46.2877	0.933012	1.17172
FBgn0004644	21.9457	4.30522	8.32337	29.8702	4.70879	13.3551	3.63803	5.30783
FBgn0004646	278.255	122.098	535.079	180.358	958.635	349.004	87.0103	820.459
FBgn0004647	1002.26	591.639	682.709	403.964	710.425	612.541	405.659	422.905
FBgn0004648	298.111	262.769	329.421	244.998	237.424	199.043	272.298	7.23818
FBgn0004649	3110.7	3800.34	273.124	2.55304	9.72122	150.934	17.0798	4.67811
FBgn0004650	445.495	273.654	40.4861	0.455085	2.69139	22.6352	1.07794	5.89537
FBgn0004652	176.036	506.194	115.526	95.7172	62.0993	279.794	601.603	208.467
FBgn0004654	498.131	309.766	203.558	245.05	199.457	300.633	169.431	305.497
FBgn0004655	528.624	228.588	242.525	127.742	277.233	214.604	2.1057	8.90448
FBgn0004656	985.742	1634.1	887.97	1040.36	606.306	875.942	890.216	591.285
FBgn0004657	582.772	472.252	1214.58	967.731	1512.53	1759.96	2093.57	2300.92
FBgn0004666	218.42	83.1635	417.523	425.197	254.639	826.953	1311.03	989.845
FBgn0004687	268.38	171.738	418.258	485.913	630.591	600.675	376.051	946.505
FBgn0004698	223.864	2.66634	75.3498	0.808009	1.7191	135.724	75.5517	170.392
FBgn0004795	290.566	298.228	32.1559	91.2197	39.7932	3.0286	109.681	334.368
FBgn0004797	109.833	166.877	18.9595	1.21479	63.6116	94.0982	3.69852	5.15877
FBgn0004811	13.2531	2.19265	3.525	2.15466	5.27511	6.61761	2.2128	2.26382
FBgn0004828	951.279	1653.6	651.802	518.105	866.422	941.525	810.23	1892.76
FBgn0004832	11.5233	48.6426	6.21141	1.01675	1.1811	1.09108	1.16283	1.27342
FBgn0004837	15.0013	2.8804	4.80625	17.768	2.91126	4.02635	2.90243	5.05043
FBgn0004838	1753.52	3034.95	1083.2	973.152	1715.51	961.236	764.588	865.673
FBgn0004839	10.3786	2.82173	2.65711	2.55102	2.47879	7.68849	2.47446	3.9841
FBgn0004842	5.18125	52.8269	17.5007	44.568	10.5086	20.2462	6.96351	13.3616
FBgn0004852	60.6001	193.703	267.556	822.667	120.811	356.963	330.405	351.723
FBgn0004855	17.1635	32.1642	9.47543	2.12826	2.30729	9.45857	2.28642	2.41632
FBgn0004856	387.363	392.681	160.536	84.4088	110.502	82.5939	219.563	260.729
FBgn0004858	180.051	3.23531	344.555	142.758	225.088	1308.65	440.534	243.789
FBgn0004859	32.0376	171.237	81.9419	97.557	30.5328	64.4645	12.9868	7.18908
FBgn0004860	110.39	38.0176	66.4007	53.0655	10.9192	57.7611	86.0816	108.524
FBgn0004861	29.6489	46.4629	39.969	11.1978	3.76561	28.0184	3.72736	6.14744
FBgn0004864	284.694	446.333	174.512	151.179	243.883	310.635	154.838	129.69
FBgn0004865	9.30198	7.34488	143.481	454.857	90.5883	161.031	252.836	62.4794
FBgn0004867	1987.02	2184.38	1703.49	1112.58	2113.04	382.512	240.929	1015.77
FBgn0004868	368.725	498.011	447.33	591.571	813.353	519.997	276.138	1604.4
FBgn0004870	13.7531	6.57119	17.9137	14.1778	8.50025	25.1122	11.9807	8.67978
FBgn0004872	285.512	297.196	39.8543	33.7192	1.55356	20.2003	1.4689	6.82572
FBgn0004875	577.688	392.71	255.82	180.405	172.973	130.571	238.842	444.777
FBgn0004876	292.111	965.19	464.245	475.459	738.058	816.754	589.942	421.375
FBgn0004878	5.00012	7.68174	2.82803	3.37226	3.22881	4.40123	2.83874	2.85222
FBgn0004882	681.864	902.536	67.9313	84.2962	5.77464	42.0288	207.561	10.9268
FBgn0004885	41.445	37.8489	107.853	202.611	129.04	330.855	632.256	35.5733
FBgn0004888	311.576	373.251	160.297	89.8512	177.709	67.9882	2.45391	206.223
FBgn0004889	288.018	607.866	137.018	200.402	138.038	178.203	320.764	273.957
FBgn0004893	62.1127	116.749	190.51	198.48	152.452	83.1887	174.708	3.84013
FBgn0004901	31.6381	50.8731	17.0471	1.45447	2.83357	1.5529	1.65128	1.80862
FBgn0004903	111.372	77.2765	76.5242	2.67726	22.1991	71.1336	113.482	6.61056
FBgn0004907	602.877	754.433	626.051	770.39	950.477	933.448	1031.57	1220.33
FBgn0004908	2.22102	2.22431	4.59043	2.21085	7.36858	4.29917	2.23166	2.25087
FBgn0004910	2.52774	2.42558	3.24173	2.56293	2.42723	2.52633	3.60687	3.27764
FBgn0004913	172.636	181.964	26.4116	47.4292	1.87878	34.8134	1.79611	4.88019
FBgn0004914	224.229	329.341	293.41	253.375	211.772	388.193	348.983	649.598
FBgn0004915	28.6226	11.3078	19.7226	33.2911	27.2261	13.8964	28.4228	6.33591
FBgn0004919	2.118	2.47277	6.29162	2.20883	3.09559	8.55439	2.13411	2.16273
FBgn0004921	155.237	393.902	137.453	227.786	170.407	141.283	2.05138	2.8308
FBgn0004924	1270.33	1134.08	466.85	720.428	688.125	276.158	561.721	368.44
FBgn0004926	752.399	329.039	297.429	74.216	388.376	130.669	210.457	6.66374
FBgn0004957	21.3444	2.95481	4.03413	10.8705	2.98789	8.99032	2.97842	4.2152
FBgn0004959	25.4414	2.83434	19.4368	2.74135	26.2079	8.73354	2.88328	3.0063
FBgn0005198	213.147	104.103	67.5743	85.493	115.378	119.589	2.42294	3.12166
FBgn0005278	1293.47	970.988	1466.4	537.782	918.926	333.752	409.415	306.728
FBgn0005322	71.521	2.12876	30.5722	1.5633	51.3412	43.1703	112.898	157.425
FBgn0005355	47.1969	3.34664	43.0559	23.7098	36.797	31.005	3.46254	3.74569
FBgn0005386	145.631	301.494	172.994	251.017	120.638	182.133	215.818	244.77
FBgn0005390	362.415	369.847	26.6673	0.776187	1.03396	16.8798	2.32303	1.3384
FBgn0005391	5074.24	701.061	17033.5	12736.9	39245.9	4525.15	1499.7	11254.6
FBgn0005411	213.923	321.942	92.4789	93.9833	98.1935	132.015	150.356	7.32742
FBgn0005427	86.9181	57.7928	124.652	67.507	105.071	139.481	162.227	7.95651
FBgn0005533	1557.65	1138.95	1384.18	1017.14	1220	648.236	397.122	644.342
FBgn0005536	471.181	346.263	233.375	270.255	224.027	342.74	12.3118	341.76
FBgn0005558	1.49901	1.5079	1.74609	1.47042	2.67113	4.9975	11.7022	1.57454
FBgn0005564	18.3277	1.3408	4.68911	73.0959	3.25406	2.25022	72.1538	206.926
FBgn0005585	1743.95	713.273	1962.35	1182.65	2815.18	489.65	493.33	1599.56
FBgn0005586	2.61299	2.44801	5.58352	3.07396	2.76036	4.3944	2.45114	2.45952
FBgn0005592	1.04217	2.90746	16.7943	0.827451	3.80153	21.9653	2.47708	219.311
FBgn0005593	2154.58	2397.46	1784.75	1201.14	2307	919.245	938.642	610.075
FBgn0005596	184.042	220.592	52.0672	23.8309	36.404	69.8088	2.68117	123.595
FBgn0005612	305.376	4.88585	685.282	734.414	435.058	1197.98	786.008	1346.11
FBgn0005613	0.79495	2.34114	14.4045	373.635	0.935734	1.48934	0.90784	1.15214
FBgn0005616	13.1866	4.34103	12.7606	3.07149	39.4389	18.6253	72.6339	10.9678
FBgn0005617	227.471	91.6323	54.4692	67.7733	22.425	71.8909	2.32178	2.92276
FBgn0005619	8.69016	1.83945	13.5982	51.3125	3.49138	8.61373	1.95746	100.964
FBgn0005624	193.644	450.306	229.408	155.86	120.033	150.181	202.616	19.468
FBgn0005630	2616.73	3342.65	1833.25	2219.34	1363.15	1648.75	1979.19	1013.86
FBgn0005631	38.1292	1.27048	38.0744	0.926666	1.47217	112.861	80.5309	1.73939
FBgn0005632	736.687	954.024	625.382	393.339	448.633	543.513	344.141	369.539
FBgn0005638	31.1121	2.06903	83.3457	66.454	82.1752	17.0172	2.24325	2.64044
FBgn0005640	409.316	549.459	590.846	1032.15	667.001	446.778	339.183	845.169
FBgn0005642	103.877	263.914	47.9523	57.002	66.136	62.4569	74.3522	7.47997
FBgn0005648	191.566	56.9742	37.987	134.031	65.3224	83.4414	49.868	7.72383
FBgn0005649	473.487	498.774	339.304	346.08	37.1458	265.507	767.991	505.798
FBgn0005654	154.225	1.48907	185.378	139.461	276.103	28.923	1.7993	426.681
FBgn0005655	213.049	192.8	59.9254	1.29905	56.608	25.9108	1.56407	2.04889
FBgn0005660	37.565	419.66	59.025	177.589	3.88884	157.572	563.632	2.55344
FBgn0005664	1.31483	1.33652	3.58541	13.9206	2.3171	1.31344	23.1783	1.48747
FBgn0005666	404.284	140.02	128.192	137.984	167.583	262.779	1016.53	145.899
FBgn0005670	4.37316	3.37893	5.28514	3.25447	3.21416	5.48882	3.21328	3.63246
FBgn0005671	1069.71	1038.76	902.094	760.044	925.265	615.301	977.193	1933.86
FBgn0005672	190.177	136.661	70.1392	102.198	99.4442	69.8734	248.374	3.81159
FBgn0005674	493.054	1247.54	376.493	365.219	459.071	253.938	135.87	200.196
FBgn0005677	2.24475	53.1869	2.15532	78.8833	5.26629	11.5168	16.5848	9.86597
FBgn0005683	5.31031	2.88926	5.36865	2.88042	2.89616	6.85642	2.89416	3.49552
FBgn0005694	68.9199	63.9405	57.1261	1.97861	3.68778	32.6158	2.03022	2.36105
FBgn0005695	217.947	258.754	82.4804	4.98531	85.2905	68.7732	101.34	22.2904
FBgn0005696	26.1812	71.262	14.9063	1.13427	1.6055	2.25627	92.2123	1.84471
FBgn0005771	95.591	42.7453	74.7429	168.503	7.10989	164.205	4.8891	101.555
FBgn0005775	34.7137	20.366	22.1714	8.04021	34.7464	92.8237	212.584	25.9136
FBgn0005777	86.4426	160.241	23.1253	54.9106	39.7821	18.5935	4.55665	3.26829
FBgn0008635	345.202	386.258	490.087	227.947	786.397	52.5178	6.20408	551.649
FBgn0008646	2.16757	2.16797	2.349	3.12188	2.34168	2.25753	3.30113	2.17138
FBgn0010014	3.31957	1.73535	1.7332	1.73188	1.73805	3.76486	1.73727	1.74239
FBgn0010015	1.18654	1.19598	5.1445	1.54967	1.22404	1.18594	11.5198	1.26443
FBgn0010019	2.13712	2.14494	8.78616	2.24624	3.33957	11.1546	2.1622	3.1436
FBgn0010038	1.25797	70.4969	15.3933	101.395	1.52082	56.6789	1.46834	1.77845
FBgn0010039	1.34832	1.42923	34.8072	44.1844	7.11006	44.6156	1.59355	162.982
FBgn0010040	2.85771	2.88037	15.2199	31.8925	25.0283	11.513	2.93021	3.05615
FBgn0010041	0.990312	13.3055	4.40853	0.951607	1.03548	0.989572	1.02617	2.03159
FBgn0010043	1.81139	1.8134	3.27282	5.00006	1.81972	2.15943	1.8179	1.82965
FBgn0010051	506.3	703.145	667.394	420.178	490.642	777.645	721.769	559.258
FBgn0010052	1.44711	1.45905	1.42829	13.0052	1.49471	9.46924	1.48471	2.56133
FBgn0010053	38.7596	4.86912	21.56	25.9129	16.3572	38.6768	3.98543	4.19693
FBgn0010078	1778.99	1086.32	1343.33	766.122	1194.2	683.775	161.854	411.115
FBgn0010097	94.1967	225.382	1.73494	0.633504	0.955267	0.791965	2.03711	1.18069
FBgn0010100	768.454	682.048	352.82	120.187	334.525	81.4462	3.7433	5.73625
FBgn0010105	1.57714	1.58414	6.43573	2.00251	1.60546	1.5767	1.59943	9.16368
FBgn0010113	795.469	1471.7	647.938	1397.02	563.526	2369.33	3065.42	1639.24
FBgn0010114	4.43626	36.2857	4.17306	41.4349	11.5182	5.66433	8.59022	19.2598
FBgn0010173	97.6143	158.901	29.4612	1.54452	1.39378	113.529	1.32968	1.7077
FBgn0010194	6.56822	1.69117	6.69996	1.67067	1.70638	1.68592	1.70205	1.7296
FBgn0010197	3.90345	3.43303	10.2755	19.5077	18.6106	5.81324	3.46098	4.822
FBgn0010198	858.346	923.274	728.643	222.457	640.662	291.24	4.3951	369.424
FBgn0010213	93.029	94.0756	24.3607	1.37209	1.46877	14.6028	1.41915	1.71226
FBgn0010215	199.029	119.777	239.376	323.624	322.812	191.257	170.798	10.5354
FBgn0010217	1107.34	1497.37	896.137	283.076	935.58	311.672	365.781	420.225
FBgn0010220	19.4237	1.05028	6.31024	1.16994	1.09511	1.48805	1.08277	1.16622
FBgn0010222	201.049	621.579	234.069	519.364	104.751	501.43	602.29	306.434
FBgn0010223	21.8776	5.16113	27.3863	28.3032	3.42349	63.2996	4.71269	7.52246
FBgn0010225	73.8602	3.59615	34.6974	41.8155	43.6855	55.3896	8.1587	6.78301
FBgn0010226	155.957	95.1335	126.67	140.714	98.9591	53.2647	2.50054	3.19231
FBgn0010228	195.247	240.411	241.1	378.237	256.997	118.242	171.11	624.149
FBgn0010235	73.5822	130.715	54.4044	180.911	62.153	67.6045	3.03227	188.464
FBgn0010238	233.629	4.83903	455	548.131	318.521	1144.25	683.408	961.383
FBgn0010240	1.16296	1.17651	3.58059	2.2984	1.21623	1.16209	16.512	2.30556
FBgn0010241	2.13723	32.5424	2.10498	28.9584	2.2219	15.7052	3.14409	2.31886
FBgn0010246	171.695	154.498	324.456	266.905	350.916	513.979	532.798	508.524
FBgn0010247	778.345	338.917	876.123	984.845	1131.65	561.431	532.954	189.423
FBgn0010265	1339.17	1890.38	1260.84	470.876	898.078	711.718	1045.76	461.36
FBgn0010269	144.741	80.8893	38.1154	66.1221	57.6103	29.5485	3.56918	104.944
FBgn0010278	323.884	9.87191	96.5134	0.846932	36.4171	94.9151	147.186	2.27908
FBgn0010280	324.264	322.514	227.214	91.9711	120.352	116.98	142.698	7.11951
FBgn0010282	299.901	93.086	173.019	97.3212	197.911	73.3686	46.4819	3.5771
FBgn0010287	17.1444	37.031	5.24084	1.9567	2.91077	1.9973	2.0409	2.11676
FBgn0010288	135.844	88.0882	77.8961	1.24058	41.8481	31.6518	271.45	233.607
FBgn0010292	80.659	60.3448	19.358	1.1415	1.55048	11.6385	1.50802	1.76013
FBgn0010300	589.866	862.429	317.498	203.874	764.844	279.653	57.4575	386.144
FBgn0010303	159.441	208.211	194.9	103.309	168.068	118.155	119.132	3.8918
FBgn0010309	47.5507	511.489	0.358148	0.268363	1.68452	0.424339	0.583334	0.830203
FBgn0010313	220.458	731.984	512.49	292.921	494.945	1129.29	854.804	972.027
FBgn0010314	16.2199	1.49563	4.79816	1.43737	1.53635	6.97842	1.52495	1.59535
FBgn0010315	56.478	65.1562	31.9043	1.82729	47.6322	5.87228	2.25603	2.57326
FBgn0010316	56.504	50.4214	22.6036	30.3083	36.5821	77.3107	3.85081	4.25868
FBgn0010323	2.07415	2.11049	2.01741	4.85436	1.90816	3.25856	1.90664	1.91651
FBgn0010328	1162.47	998.16	330.84	128.36	111.685	137.751	165.449	12.393
FBgn0010329	7.94091	6.69443	12.1811	37.0635	40.0513	37.9565	78.7997	46.4894
FBgn0010333	114.821	1.94228	154.367	106.169	169.333	116.174	4.22934	251.607
FBgn0010339	101.397	3.68937	34.7706	48.738	71.7047	51.9299	2.57491	3.01568
FBgn0010340	9.89951	1.53978	7.63276	1.50489	1.56492	1.88183	1.55783	1.60225
FBgn0010341	165.709	413.168	178.764	185.103	158.152	207.334	260.326	7.20048
FBgn0010342	41.9981	263.869	49.4754	39.6721	5.3151	16.9287	3.51674	2.34629
FBgn0010348	716.273	1074.34	930.375	622.774	1294.03	528.84	352.352	916.559
FBgn0010350	139.05	315.429	81.0925	20.6971	120.957	28.066	9.88626	231.811
FBgn0010352	521.3	364.736	340.167	412.821	296.957	224.573	690.716	325.671
FBgn0010355	373.451	373.108	162.033	1.59264	119.533	58.6518	117.188	245.618
FBgn0010356	38.2559	3.07388	14.3962	2.85316	32.9062	34.2746	51.3512	3.45629
FBgn0010357	20.2481	146.825	0.299655	0.489265	0.525069	0.355477	0.490394	0.699529
FBgn0010379	220.866	180.407	185.713	304.197	95.5984	117.077	2.61974	222.502
FBgn0010380	340.299	104.018	281.2	186.708	296.62	133.727	335.621	576.034
FBgn0010382	173.205	545.867	94.5539	206.76	197.679	50.0674	144.567	6.77101
FBgn0010383	137.211	1.88538	336.375	243.626	178.033	278.962	190.761	680.77
FBgn0010387	0.486374	0.537755	5.21953	0.885889	0.684524	0.484241	0.644898	998.629
FBgn0010389	7.80276	3.73915	3.54927	7.10739	3.55587	3.55095	3.8168	3.56188
FBgn0010391	348.761	184.838	324.146	407.836	262.261	123.494	98.7298	246.361
FBgn0010395	18.3821	155.872	23.1686	23.3832	1.9541	31.0517	1.89833	2.2374
FBgn0010397	194.459	254.092	327.35	322.168	235.483	504.048	593.719	985.67
FBgn0010398	3.82355	2.26105	7.68066	2.24747	2.27145	5.60148	2.26846	2.28788
FBgn0010399	37.8745	104.124	36.171	1.15239	6.99115	139.244	1.92018	153.301
FBgn0010406	155.911	1.57256	129.761	124.809	202.718	103.361	1.89491	487.139
FBgn0010407	1.6467	1.64769	1.64518	3.87358	1.65083	2.98303	1.64993	1.65585
FBgn0010408	1143.78	1601.81	1013.07	837.152	1268.31	549.474	178.378	1128.75
FBgn0010409	1884.99	1590.72	1406.37	899.083	1528.58	757.231	23.2506	842.057
FBgn0010411	1041.1	1466.27	1035.69	862.201	1456.91	524.444	450.758	2124.82
FBgn0010412	2910.81	1410.32	2157.4	573.378	1652.09	1287.52	301.434	591.555
FBgn0010414	6.74818	3.90247	5.14668	3.70185	7.5911	4.02173	3.71003	3.71796
FBgn0010415	710.391	243.076	1404.28	1683.99	1214.48	1071.33	1179.26	705.572
FBgn0010416	25.707	3.03766	36.113	3.17992	33.9522	26.3674	3.11886	5.28352
FBgn0010417	23.3767	2.42316	22.5925	2.88729	35.3924	28.22	118.397	5.35053
FBgn0010421	5.45995	1.78144	4.775	1.76986	1.79021	1.77844	1.7877	1.80389
FBgn0010422	83.6694	2.4313	23.3786	2.15625	16.3832	36.225	36.6205	2.87576
FBgn0010431	119.777	129.872	8.84373	0.613433	1.08415	14.5567	1.03808	1.30719
FBgn0010434	461.603	367.772	905.342	963.854	587.93	1481.5	2097.37	1910.04
FBgn0010435	218.834	3.47606	441.073	485.432	315.186	545.473	232.11	627.042
FBgn0010438	22.5758	41.0438	18.7159	3.39884	26.9912	3.95532	3.32647	5.38527
FBgn0010441	15.4912	78.1105	21.4798	2.48266	12.8249	8.03378	2.438	2.64356
FBgn0010452	10.4415	2.50262	38.0522	78.4099	9.65361	24.1133	2.66323	85.5473
FBgn0010453	4.19858	1.5766	1.84818	1.52661	1.6121	2.34068	15.0566	4.21734
FBgn0010470	310.934	324.18	239.876	216.075	205.338	60.4138	51.4144	274.752
FBgn0010473	95.9738	163.667	25.7477	58.0266	69.2265	68.5839	87.3089	11.0741
FBgn0010482	8.70531	18.4563	9.46438	4.388	20.3549	13.4283	5.28132	4.54501
FBgn0010488	2404.32	3370.73	1525.32	1776.39	1323.18	1291.95	2115.3	1607.74
FBgn0010497	22.2501	3.44188	14.6631	24.4693	12.4607	3.98831	3.48207	3.58532
FBgn0010501	73.8609	145.907	30.2151	7.29661	1.78325	26.4664	1.7214	2.08946
FBgn0010504	65.0206	23.9936	90.6097	58.5523	75.5256	53.8967	144.406	97.4366
FBgn0010516	189.082	261.401	151.669	81.9144	210.279	138.028	115.164	146.997
FBgn0010520	4.15336	1.68233	2.96802	1.67862	1.68521	1.68136	1.68438	1.68985
FBgn0010531	4.5632	1.71953	2.54879	1.71243	1.72495	1.71769	1.72339	2.19151
FBgn0010548	145.953	336.072	82.8211	97.0763	128.712	227.92	152.526	173.838
FBgn0010551	199.126	235.068	133.869	1.36724	66.8855	84.1033	3.44986	2.31194
FBgn0010575	1098.39	1182.81	991.7	731.219	1156.62	676.182	442.004	561.721
FBgn0010583	228.785	240.686	91.2971	202.62	89.2638	88.5147	141.045	322.959
FBgn0010590	55.3029	172.741	38.5946	48.872	82.143	37.6801	4.82525	3.5028
FBgn0010591	84.5627	3.56812	147.418	96.2652	104.356	186.973	217.682	3.13207
FBgn0010602	400.841	135.666	152.832	49.551	106.515	109.626	4.02125	2.86478
FBgn0010607	79.2381	74.6818	14.7051	50.6219	4.77865	10.9572	162.446	6.05376
FBgn0010611	111.582	1.52323	220.098	139.132	219.215	162.667	5.15748	2.43262
FBgn0010612	50.3883	2.01817	52.0655	43.2435	86.1328	6.57242	2.17156	2.52218
FBgn0010620	106.568	201.341	221.795	252.115	139.936	625.038	185.201	518.991
FBgn0010621	864.649	679.983	308.444	259.447	551.937	53.0454	186.693	3.21648
FBgn0010622	19.9724	1.57794	8.44405	1.49783	11.8083	1.5581	1.61775	1.71237
FBgn0010638	110.092	3.89972	283.371	158.703	317.784	29.048	1.67773	5.00576
FBgn0010651	18.4997	2.23272	32.499	49.8018	2.36424	35.5794	2.32759	2.55235
FBgn0010660	298.235	620.19	145.921	0.777957	406.435	55.7605	604.18	279.444
FBgn0010741	63.7897	1.90132	36.6198	1.66812	31.811	28.0607	2.01177	2.26632
FBgn0010747	148.614	136.666	144.079	1.01049	194.672	80.0574	3.99489	268.573
FBgn0010750	138.177	184.914	84.2059	60.4991	136.609	48.8457	83.9747	14.0765
FBgn0010762	238.157	551.003	224.084	217.343	319.683	232.958	16.175	9.64807
FBgn0010768	79.9137	3.08815	49.4927	38.6729	119.967	39.5918	5.1822	42.1649
FBgn0010770	88.476	1.63743	28.0977	30.4498	29.8894	1.57623	1.75638	2.02531
FBgn0010772	104.392	150.353	77.4698	40.2164	202.267	155.866	128.111	3.86664
FBgn0010774	337.03	202.745	129.713	128.517	225.274	216.442	43.0832	3.4969
FBgn0010786	421.831	271.005	71.2412	116.036	308.314	93.7974	558.234	3.2475
FBgn0010803	90.1052	2.32503	29.3342	40.237	44.8875	69.6932	2.49897	2.90003
FBgn0010808	96.129	91.8664	67.9694	3.28376	85.4162	42.9699	3.07223	49.8212
FBgn0010812	80.7073	12.7488	102.02	83.4223	133.51	73.0248	129.327	3.98104
FBgn0010825	688.771	1108.81	701.502	344.485	719.967	621.43	824.485	642.384
FBgn0010830	17.5372	2.0339	10.8976	2.15846	2.08003	11.8568	2.06701	2.14869
FBgn0010877	257.353	171.747	250.942	214.986	279.335	741.789	707.37	802.507
FBgn0010894	6.23503	96.7129	44.0625	32.5727	2.02207	38.2344	1.93918	216.174
FBgn0010905	965.425	901.154	1385.68	1064.1	1735.17	974.464	606.708	1019.9
FBgn0010909	1068.92	875.698	1172.59	1008.36	1079.01	1957.62	2542.51	1102.8
FBgn0010926	158.733	162.427	40.1539	1.0161	106.655	48.6238	3.47873	2.30747
FBgn0011016	151.987	145.332	368.218	313.047	654.367	50.9676	385.6	198.148
FBgn0011020	39.8194	25.7706	20.3696	3.4865	18.1214	3.31148	3.41015	6.96168
FBgn0011202	328.142	1.85634	241.099	234.923	337.992	480.794	655.612	754.323
FBgn0011204	359.468	446.631	195.143	168.169	168.345	121.219	23.348	6.63613
FBgn0011205	128.245	165.658	116.836	58.2478	186.519	530.566	181.7	592.267
FBgn0011206	103.602	351.108	158.403	401.195	124.894	289.019	53.6867	134.739
FBgn0011207	54.0462	103.544	48.4521	2.63063	70.2137	65.825	2.90976	109.906
FBgn0011211	1886.63	2315.46	1346.01	1004.16	1958.32	294.719	44.5392	833.435
FBgn0011217	783.382	750.471	530.088	461.537	787.823	668.541	283.363	1214.56
FBgn0011224	865.24	921.542	1211.43	1151.73	1223.03	1613.34	1114.15	1055.3
FBgn0011225	459.472	276.738	569.13	662.509	1018.31	192.662	724.526	587.997
FBgn0011227	3.51106	2.28655	5.21354	1.8983	1.90875	1.90266	1.90744	1.91604
FBgn0011230	1785.85	1480.95	1748.03	1319.72	1423.52	1255.39	973.227	1021.24
FBgn0011232	43.6218	2.46443	14.2162	33.8891	75.7561	14.1809	2.58775	2.87901
FBgn0011236	304.14	575.915	310.388	280.788	234.092	377.138	339.097	55.0318
FBgn0011241	84.0713	2.76037	18.3898	1.45222	47.1072	28.6148	1.83597	2.11129
FBgn0011259	58.606	93.2339	41.9425	128.24	86.2042	38.3605	201.087	13.699
FBgn0011260	68.3426	73.1727	75.8827	81.6505	84.9145	3.03843	8.50226	20.1155
FBgn0011272	2067.91	1409.61	1956.09	953.831	1945.49	1064.58	781.084	535.337
FBgn0011274	67.5518	3.64894	123.858	187.67	4.71801	61.1561	232.757	83.5729
FBgn0011278	2.04668	1.42698	1.42596	1.42535	1.42825	2.64435	1.42789	1.43032
FBgn0011281	2.09197	2.09317	2.09016	4.15406	2.09694	4.71589	2.09585	2.5388
FBgn0011284	2351.37	2623.18	1855.46	1227.97	2397.26	880.313	1461.31	440.725
FBgn0011286	30.4235	2.54967	2.91829	21.5173	2.61386	13.5367	2.59569	5.47569
FBgn0011288	33.4244	124.876	15.1953	35.3226	34.3608	86.8571	135.173	100.697
FBgn0011289	114.272	141.436	51.9583	75.1756	121.392	68.1733	5.17841	6.99371
FBgn0011290	73.4377	2.99381	29.7688	23.6426	103.581	51.5023	55.3809	3.69098
FBgn0011291	3.09593	0.944558	1.84828	1.05324	0.976183	0.932999	12.802	1.02164
FBgn0011296	4.76081	2.78978	6.13188	2.78122	2.79645	6.23113	3.1339	2.80718
FBgn0011297	130.997	76.0889	25.5043	32.8605	43.7403	16.6173	4.81706	3.51928
FBgn0011300	133.678	299.846	166.109	240.275	204.26	132.16	94.7073	145.071
FBgn0011305	5.45979	3.06992	26.0087	19.9105	4.12028	20.3221	3.10872	3.20851
FBgn0011327	77.4565	36.3004	46.652	63.7076	70.9284	66.197	3.56642	4.08137
FBgn0011335	13.7884	1.85204	7.13419	1.76746	1.91135	3.65183	22.648	1.99767
FBgn0011336	183.728	1.5999	371.217	343.654	418.253	135.373	57.6811	5.70361
FBgn0011361	149.383	83.143	100.754	62.8609	96.9246	21.2998	226.193	3.71101
FBgn0011455	75.6096	77.1889	30.7928	17.1521	2.66681	20.2209	141.371	3.07791
FBgn0011474	264.597	343.768	131.507	18.3519	35.6946	122.24	106.007	272.863
FBgn0011476	9.69573	2.81037	5.78096	16.8839	5.18229	2.80178	2.82832	2.87492
FBgn0011481	431.372	419.593	108.578	114.442	228.638	93.881	189.111	3.38507
FBgn0011509	55.6228	3.1457	41.3723	26.9719	40.5866	34.4026	3.27502	3.58695
FBgn0011559	1.09158	2.18127	5.26359	41.3238	1.33475	74.9222	1.28634	113.768
FBgn0011566	12.4036	23.2252	10.3821	1.70486	1.63716	1.55057	1.61945	1.72766
FBgn0011570	182.087	1.80251	117.611	89.3369	92.6317	80.3725	2.11216	279.811
FBgn0011571	689.373	727.772	198.105	253.763	69.4562	107.444	7.36159	11.5802
FBgn0011573	130.37	5.36671	103.908	121.89	123.28	33.3098	66.6712	3.47667
FBgn0011582	288.709	696.4	194.387	591.508	852.557	599.785	4826.16	2565.79
FBgn0011584	253.539	323.949	212.222	147.673	224.235	94.3449	317.355	163.478
FBgn0011586	22.2555	1.90507	11.0868	2.23134	12.0894	2.43171	1.94715	2.04902
FBgn0011589	22.4661	2.93143	7.36478	50.6835	5.78244	2.88186	51.1375	16.7037
FBgn0011591	338.069	3.32144	584.805	987.246	937.109	259.405	543.466	2041.36
FBgn0011592	277.552	318.624	236.839	106.088	106.755	51.2601	73.069	90.0107
FBgn0011596	1.19649	1.2315	30.7529	1.07727	54.4786	26.7816	1.30478	1.47244
FBgn0011603	2.25411	2.05791	2.75009	1.9107	1.91585	3.87327	1.91519	1.9195
FBgn0011604	261.083	303.859	69.8575	109.417	31.6311	20.03	1.93881	5.43834
FBgn0011606	71.2495	84.0149	19.9694	2.00055	16.7057	20.5494	3.95882	2.78244
FBgn0011638	400.762	350.159	106.373	46.1662	76.1979	160.959	1.86198	2.5741
FBgn0011640	406.712	751.48	172.996	103.313	116.92	7.4608	193.795	524.999
FBgn0011642	38.5037	66.9509	24.5302	2.68683	26.9531	46.7381	99.0515	3.72537
FBgn0011648	125.732	389.654	130.266	246.944	9.20976	93.2782	470.7	232.276
FBgn0011655	102.926	327.863	78.2314	65.2666	77.6442	48.0365	251.614	6.94539
FBgn0011656	179.434	295.055	180.284	200.792	156.518	290.551	447.012	148.918
FBgn0011659	1.62019	1.62104	2.68471	1.61758	1.62372	4.04713	1.62295	1.62804
FBgn0011660	32.3652	55.797	7.36521	1.6217	1.90936	18.3375	1.8776	2.07038
FBgn0011661	2194.29	1327.76	1534.75	2934.98	1413.01	1780.59	3078.85	2019.64
FBgn0011666	217.667	491.536	444.942	1501.88	473.49	535.341	427.262	383.349
FBgn0011672	97.1217	108.675	260.584	385.298	313.811	90.4583	147.08	232.081
FBgn0011674	688.692	346.641	1098.8	1369.52	554.72	1468.24	3098.64	1340.09
FBgn0011676	6.34397	167.877	100.386	133.057	36.5844	157.212	104.248	17.721
FBgn0011692	57.7992	77.0606	12.4238	1.31219	1.70059	9.61201	1.65928	3.88366
FBgn0011695	1.62649	1.6415	6.74049	1.57765	9.51728	1.62553	16.9469	1.75178
FBgn0011701	3.19343	1.67897	3.12714	1.67625	1.6811	1.67826	1.68049	1.68453
FBgn0011703	231.119	215.309	38.3997	1.56242	45.3033	81.0628	1.99137	145.85
FBgn0011704	402.648	100.775	45.5561	62.8901	155.26	39.9639	2.31672	252.724
FBgn0011705	10.7985	20.5247	9.15836	1.79395	1.72102	1.6461	1.70559	1.80065
FBgn0011706	1.63481	1.63639	2.83545	1.62994	1.64131	4.20517	1.6399	1.64906
FBgn0011708	148.719	226.409	150.939	91.1815	136.737	164.808	127.882	496.273
FBgn0011710	209.095	216.424	290.15	161.263	555.567	193.085	2.41079	342.152
FBgn0011715	10.9899	2.43051	9.37532	2.40691	2.44846	3.79354	2.44331	3.34536
FBgn0011722	12.5809	3.15343	4.98831	20.656	4.00384	10.7688	3.1785	3.24329
FBgn0011725	308.903	416.092	339.848	347.848	378.115	254.294	276.489	7.14483
FBgn0011726	385.777	607.637	346.195	213.141	277.44	390.261	476.886	463.745
FBgn0011737	16.105	3.46487	21.7848	3.4119	12.3762	10.0903	3.49364	3.56853
FBgn0011739	291.559	366.469	284.013	365.916	142.094	294.521	425.772	210.803
FBgn0011740	84.3783	91.5519	47.0535	1.04343	1.8108	31.9759	1.73369	167.724
FBgn0011741	18.6269	3.28282	10.2925	8.09507	3.31187	8.20412	3.30354	3.35749
FBgn0011742	402.406	478.231	218.112	192.263	271.987	193.136	112.69	3.47869
FBgn0011745	78.4143	2.02662	90.7827	53.5232	69.0198	88.2918	2.24063	2.72364
FBgn0011746	7.9074	1.38708	69.7687	19.7053	83.6379	2.18656	1.50527	1.76809
FBgn0011747	331.001	842.575	534.578	403.644	623.25	332.806	270.568	13.4414
FBgn0011754	112.265	616.183	260.604	344.161	264.453	95.3767	270.029	6.81407
FBgn0011760	443.843	1080.91	636.249	604.478	495.365	606.167	559.585	860.614
FBgn0011761	4061.31	1672.18	140.433	0.333609	2.61706	77.3338	2.39331	1.52584
FBgn0011762	88.9383	2.05043	134.213	125.527	77.8603	274.178	251.412	359.749
FBgn0011763	427.53	581.477	132.878	128.751	6.32475	184.079	212.05	6.07794
FBgn0011764	433.444	416.609	154.024	1.79051	23.1343	92.559	226.569	11.0018
FBgn0011766	600.911	242.2	572.029	382.534	632.495	512.779	410.336	754.993
FBgn0011768	115.715	73.4132	53.0406	1.09324	1.80593	10.8727	118.311	2.16115
FBgn0011769	26.1836	4.30424	26.7887	26.0926	17.7941	25.0599	4.37042	4.53932
FBgn0011770	71.8184	104.299	26.5943	1.73428	35.4854	10.9231	2.24983	5.03483
FBgn0011771	117.608	5.2709	88.0273	171.278	73.7782	154.286	218.891	445.79
FBgn0011774	31.9137	70.1411	1.87228	1.71492	30.0597	57.5159	89.2218	2.66645
FBgn0011785	592.734	269.677	276.112	221.123	200.637	302.487	199.711	198.539
FBgn0011787	12.2034	0.894017	5.70975	0.84622	0.925516	0.88243	0.916831	0.972293
FBgn0011802	19.5903	35.9062	25.3709	2.38867	33.493	2.5032	2.61883	2.80669
FBgn0011817	129.747	376.56	401.604	480.591	316.524	167.241	13.8996	389.46
FBgn0011818	265.232	137.327	67.3033	172.387	32.1707	190.194	2.53042	227.425
FBgn0011824	332.674	279.554	112.054	67.2185	122.205	15.422	1.94274	5.51643
FBgn0011826	353.194	263.114	99.142	123.426	104.56	84.6036	142.23	7.17373
FBgn0011828	167.993	1.34146	15.1714	121.762	6.33678	7.76127	183.684	2.01684
FBgn0011829	0.954311	1.00051	1.44934	26.0709	1.12838	19.6012	1.09379	231.306
FBgn0011836	82.3013	174.697	54.9181	1.36863	49.9537	18.779	7.80704	2.54942
FBgn0011837	575.689	404.196	751.093	713.082	737.786	444.809	565.16	130.196
FBgn0012034	128.286	178.707	65.075	52.3038	28.4349	42.5417	5.0728	208.838
FBgn0012036	254.064	462.382	78.6895	0.946416	52.5094	243.938	139.52	220.607
FBgn0012037	1.66466	0.893706	38.2376	0.598476	2.41103	61.4673	152.325	1.27096
FBgn0012051	16.6744	2.5273	31.2702	48.295	2.66044	42.084	2.62316	4.89003
FBgn0012058	89.9043	115.67	95.4367	74.9423	72.9943	35.7277	4.98909	326.393
FBgn0013263	333.24	386.833	255.724	106.222	165.138	252.541	190.674	295.852
FBgn0013269	850.991	644.346	106.622	31.1909	1.29919	53.7406	1.21154	1.74032
FBgn0013272	1564.44	895.604	2269.08	1694.67	2508.88	2688.03	2574.91	2690.31
FBgn0013275	1.75791	1.75902	2.81816	2.08298	1.76255	1.75784	4.2848	1.76818
FBgn0013277	4.33824	3.69404	6.59973	4.06093	7.57148	7.12731	3.69971	4.95038
FBgn0013278	18.3589	3.59373	31.4266	63.5139	30.6405	67.6487	9.02958	6.576
FBgn0013279	10.8726	2.19279	36.002	2.2882	51.9668	51.0915	2.34385	80.0206
FBgn0013303	27.3085	3.88227	19.1805	27.9846	5.1075	16.5144	5.89419	4.06682
FBgn0013305	48.4386	123.515	91.24	102.822	123.928	161.46	201.973	105.549
FBgn0013325	1351.41	1177.6	1068.81	500.31	1343.32	485.338	876.348	1085.06
FBgn0013334	233.242	785.748	276.661	440.465	512.739	576.806	217.609	792.377
FBgn0013342	1.56786	1.62013	15.9028	57.9431	1.76979	17.5109	67.2823	1.97533
FBgn0013343	178.091	203.869	192.837	198.718	175.311	357.823	2.60197	125.09
FBgn0013347	27.1401	111.005	15.2451	23.4123	2.1931	7.93819	3.57103	2.44489
FBgn0013432	5.63798	3.87428	14.965	10.9514	3.8911	10.5938	3.88624	3.91818
FBgn0013435	3.64626	2.04201	2.03154	2.02503	7.6065	4.68675	2.05118	2.07487
FBgn0013467	18.0067	1.12775	1.02454	1.53181	1.23744	10.7467	245.479	1.38536
FBgn0013469	101.248	4.67905	143.015	122.532	91.0145	56.3051	88.6493	17.777
FBgn0013531	5.08072	1.47207	2.53262	1.46194	1.47968	1.46946	1.47751	1.49144
FBgn0013548	44.0472	138.929	29.1352	43.9068	46.8365	13.7624	2.82872	3.28701
FBgn0013563	6.51438	2.99513	20.6847	25.7285	3.04821	18.4729	3.03303	3.13051
FBgn0013576	1143.32	1424.5	1744.06	1929.85	1734.03	4403.95	3719.86	3363.82
FBgn0013672	4816.68	3434.71	7678.71	1288.88	2198.9	3974.54	7365.01	4445.28
FBgn0013673	353.338	174.431	325.689	44.4659	28.9466	219.87	396.091	522.535
FBgn0013674	32694.9	10623.6	46941.4	6661.11	10001.3	18718.9	26320.3	17469.7
FBgn0013675	7069.29	2323.3	7671.53	1573.47	1900.44	4243.36	5822.54	2427.53
FBgn0013676	17138	6410.14	23879.6	3381.01	5052.07	12456	19231.5	11583.2
FBgn0013678	11034.4	3672.17	13972.2	1778.78	2755.55	7521.74	10985.8	7330.99
FBgn0013679	11054.4	2278.75	12953.2	1540.55	1482.25	4662.95	4968.61	4118.47
FBgn0013680	1894.83	905.992	2352.59	547.044	602.685	816.792	761.255	792.406
FBgn0013681	180.336	102.686	137.632	13.4622	3.00559	73.7616	72.8478	35.1678
FBgn0013683	258.27	127.67	466.968	69.7953	94.0206	204.495	398.117	3.32239
FBgn0013684	7899.25	4636.63	12962.5	1889.24	2701.25	4241.99	8471.08	4310.71
FBgn0013685	301.68	91.787	493.629	45.9824	24.6456	122.454	60.1444	257.635
FBgn0013686	61598.5	60692.4	231376	46430.7	45621.2	165146	356240	138107
FBgn0013688	33093.8	19246.6	70589.2	9849.78	13997.5	29821.6	51807.9	26193.2
FBgn0013689	4.57967	2.19894	3.20502	2.18418	2.2102	2.8742	7.52694	2.22788
FBgn0013690	3.65159	1.74811	4.31309	1.74178	1.75297	1.74646	1.75157	1.76067
FBgn0013691	4.39691	1.99788	2.21382	1.99225	2.00225	5.02639	2.00098	2.00925
FBgn0013694	12.7767	0.958463	20.3341	0.77402	1.06863	0.916281	1.03877	274.689
FBgn0013695	3.36574	7.53422	1.93169	1.92509	1.95525	4.17963	1.95154	1.97536
FBgn0013697	1.41179	1.41238	1.98115	1.40996	1.41428	3.27802	1.41373	1.41732
FBgn0013698	2.02118	2.02519	5.34059	2.00871	7.33438	2.02093	3.13495	2.05709
FBgn0013699	9.98035	2.73906	6.99043	2.72159	7.22056	2.73451	2.74863	2.77386
FBgn0013702	4.75668	1.65257	3.16151	1.64415	1.65896	1.65039	1.65713	1.66897
FBgn0013703	2.90811	1.49213	2.22078	1.4902	1.49364	1.49163	1.4932	1.49608
FBgn0013704	1.61716	1.61962	3.29124	1.6095	1.62727	1.61701	5.1573	1.63916
FBgn0013709	29.2096	1.2233	165.917	1.04173	21.5852	1.18064	1.30585	1.49118
FBgn0013710	0.690954	0.702325	4.10323	0.651096	0.734448	0.690217	12.7466	0.801931
FBgn0013717	48.8407	2.09158	20.7143	1.91764	48.2508	8.04572	2.17846	4.29884
FBgn0013718	257.961	132.564	350.865	349.96	295.336	465.477	461.664	426.944
FBgn0013720	23.9489	163.735	27.6107	1.22184	35.5745	54.858	1.80436	2.19879
FBgn0013726	579.022	684.996	396.72	294.126	335.263	192.983	196.451	169.979
FBgn0013732	30.2187	28.06	4.39135	1.34844	1.30759	1.18326	1.28289	2.93333
FBgn0013733	1956.28	3135.56	3160.42	4034.59	2799.01	4205.63	3863.92	5016.76
FBgn0013746	44.7064	131.936	32.2494	2.72477	16.2262	30.5512	2.85543	47.5919
FBgn0013749	33.5958	27.0074	33.2591	12.3292	65.9243	37.3595	75.7448	5.1466
FBgn0013750	137.583	117.885	102.414	78.6456	24.5275	39.6933	106.324	4.1329
FBgn0013751	4.02693	48.9535	11.3738	3.94263	36.6499	44.2981	5.79614	7.46521
FBgn0013756	836.255	843.683	359.853	187.364	349.491	157.045	242.739	347.297
FBgn0013759	242.205	517.378	217.612	162.501	191.136	451.002	236.627	22.3127
FBgn0013762	17.9726	3.10003	8.95026	3.06733	6.467	5.82106	3.7497	3.16422
FBgn0013763	202.119	15.7629	3.05208	1.12025	1.42229	16.0181	1.39029	1.58159
FBgn0013764	136.46	107.443	53.1887	43.5132	122.808	28.4266	2.59835	3.19594
FBgn0013765	205.807	167.922	15.3025	0.740813	23.8292	67.8579	1.39915	1.82525
FBgn0013770	835.556	721.31	2538.05	2452.3	2545.54	2098.62	2478.07	4410.8
FBgn0013771	1.83823	47.5681	9.47531	1.6916	2.00883	31.4234	42.397	2.18777
FBgn0013773	21.8857	0.968531	5.27806	0.896118	1.01502	0.951213	1.6956	1.09965
FBgn0013799	93.3188	3.90568	25.7346	77.438	45.8013	52.7764	2.70882	164.451
FBgn0013809	7.32273	3.38376	5.72361	3.15413	3.55405	8.72673	3.08578	3.10535
FBgn0013810	28.1381	4.87246	10.1791	3.65929	3.75771	15.1102	15.2199	3.82538
FBgn0013811	14.1925	2.34953	14.255	2.48678	3.79122	45.6665	46.1428	2.63284
FBgn0013812	2.31504	88.8555	13.7082	160.632	45.3537	65.9502	6.17358	69.7355
FBgn0013813	1.95632	1.95702	3.09137	2.03606	2.18023	2.07359	3.69931	1.96287
FBgn0013953	87.9005	3.48199	162.477	174.335	155.171	557.648	292.762	460.248
FBgn0013954	201.043	201.525	108.291	1.09033	172.74	158.425	142.461	6.05703
FBgn0013981	140.601	208.997	178.211	1.30721	132.461	82.8564	1.66969	2.23778
FBgn0013983	34.3099	3.11917	20.8906	2.99436	22.0548	24.708	4.31317	3.34674
FBgn0013984	477.532	875.275	506.101	403.271	554.475	609.716	981.292	259.112
FBgn0013987	128.017	295.707	154.986	110.818	166.339	231.016	10.6797	356.142
FBgn0013995	213.239	199.213	16.8558	74.4291	33.5878	34.3347	3.92377	2.70903
FBgn0013997	191.221	124.185	264.683	422.045	237.718	241.693	8.16086	938.004
FBgn0014002	949.244	309.032	2086.15	1592.17	4564.85	653.502	895.997	808.927
FBgn0014006	59.2104	507.754	76.6096	3.09675	105.976	226.3	100.213	2.65377
FBgn0014007	92.3696	76.0026	79.1173	21.3431	53.512	62.7393	3.17051	3.70225
FBgn0014009	131.409	80.6733	157.521	79.7812	249.754	224.504	146.002	3.75178
FBgn0014010	232.216	144.199	466.336	225.91	461.879	270.845	632.943	297.748
FBgn0014011	200.86	366.92	154.07	286.962	196.451	254.978	380.691	150.118
FBgn0014018	167.342	614.821	208.632	473.077	84.6628	473.81	595.752	303.259
FBgn0014020	321.793	109.554	456.294	327.757	425.267	503.645	525.803	479.026
FBgn0014022	43.5101	2.08501	13.3638	1.93541	2.18971	13.8497	2.16037	40.7809
FBgn0014023	18.2663	3.90674	9.04904	15.9321	3.94087	11.867	3.93106	5.23762
FBgn0014024	342.826	137.205	58.9899	165.123	77.5435	46.8821	2.29512	11.4185
FBgn0014026	2156.53	701.962	1693.67	960.535	1494.77	668.192	437.53	1061.91
FBgn0014028	68.0605	60.9382	34.0491	15.8446	4.2013	7.35066	2.57019	2.87026
FBgn0014029	209.754	163.472	259.94	214.182	172.645	273.627	215.947	658.314
FBgn0014031	8.91217	25.1242	4.41528	1.54713	1.7011	5.95025	1.68362	1.79078
FBgn0014032	33.9896	86.0369	12.6905	2.09825	38.6	64.8034	2.58437	5.39053
FBgn0014033	3.81933	3.49785	12.3693	3.47432	3.51618	9.58659	18.0554	3.54562
FBgn0014037	738.196	683.528	890.171	1414.55	1020.74	1110.38	1183.99	464.233
FBgn0014073	57.5321	1.76414	118.767	252.097	101.649	392.465	675.683	180.807
FBgn0014075	307.585	6.99357	305.803	193.207	662.18	152.066	5.77967	572.305
FBgn0014076	905.289	82.4968	1333.13	265.753	503.175	379.603	138.491	642.138
FBgn0014092	11.1396	2.71401	7.09938	7.86486	2.72967	2.70871	2.72517	2.75443
FBgn0014127	11.4811	1.01941	0.992708	0.974874	1.0495	6.17375	1.04115	1.09248
FBgn0014133	1197.49	862.187	1449.13	921.976	1029.08	1042.2	989.122	1538.87
FBgn0014135	90.6705	4.92229	54.8125	10.1314	26.8405	438.688	6.24471	7.24133
FBgn0014141	995.445	1084.26	1473.61	1598.62	1242.89	2550.83	4127.81	2341.63
FBgn0014163	223.57	537.087	388.144	290.794	242.576	612.597	672.979	207.578
FBgn0014184	1078.38	2471.34	1632.31	2388.95	2245.15	1088.26	1632.23	1817.75
FBgn0014189	435.188	441.668	126.681	41.5265	233.833	96.6765	4.32028	377.209
FBgn0014269	68.4312	2.10545	18.8455	28.0952	47.1355	3.06407	2.27663	107.005
FBgn0014340	75.543	3.87797	34.1338	38.9905	4.67864	19.5197	124.871	5.83203
FBgn0014342	1.4271	1.43693	1.41164	3.40694	1.4665	4.4492	12.6354	1.50982
FBgn0014343	90.2695	1.97312	157.572	40.2631	268.479	88.0004	209.193	385.532
FBgn0014366	122.691	190.192	58.9274	38.6604	18.4048	58.1934	12.0922	3.44713
FBgn0014380	12.4463	88.2742	41.0987	97.2433	2.12474	78.4901	2.05453	2.47455
FBgn0014388	174.229	107.39	323.307	496.79	270.527	150.384	6.49341	489.753
FBgn0014391	241.251	215.991	158.308	51.3526	132.388	72.4434	2.14353	2.85822
FBgn0014396	186.366	159.263	290.7	252.603	394.258	401.704	202.088	7.10402
FBgn0014411	205.843	324.997	104.031	152.461	187.967	102.711	4.16402	3.01447
FBgn0014417	11.2209	1.42354	1.8916	1.38453	1.45127	6.80119	1.44347	1.49194
FBgn0014427	13.8642	28.6089	16.087	3.13578	3.27673	18.4064	3.25953	3.36967
FBgn0014455	259.187	383.15	121.508	86.1251	195.461	15.6138	4.38007	232.223
FBgn0014464	297.937	1.83797	304.023	180.808	98.755	482.554	113.661	36.3699
FBgn0014465	2259.31	4.9896	1406.54	608.857	774.031	1731.87	916.593	915.094
FBgn0014466	1475.09	355.519	1485.49	635.592	851.705	2607.47	367.533	1103.96
FBgn0014469	46.3881	0.949699	9.83521	0.621125	1.13435	101.634	1.08468	145.077
FBgn0014857	146.746	204.073	34.0145	42.428	102.426	83.5764	2.98626	103.683
FBgn0014859	13.3795	7.54869	28.2564	41.4833	40.9389	6.34225	38.484	9.24687
FBgn0014861	107.892	81.2767	28.0083	1.6183	3.45161	2.48016	79.5717	2.1131
FBgn0014863	29.838	93.9023	13.4468	46.5111	2.8196	6.0048	59.1107	3.13204
FBgn0014868	336.281	222.525	272.337	171.019	204.76	42.116	3.94924	2.84942
FBgn0014869	238.154	323.65	109.752	185.564	136.351	96.7569	281.252	548.752
FBgn0014870	171.357	118.638	105.063	58.3964	191.617	42.7672	133.747	434.956
FBgn0014877	182.811	80.4205	28.4957	1.46238	28.7653	18.1581	168.508	137.159
FBgn0014879	216.892	279.124	42.3636	42.7587	40.4055	48.0906	3.92302	2.72511
FBgn0014903	2.46243	1.558	3.32092	1.5546	1.56064	1.55712	1.55988	1.56483
FBgn0014906	88.9615	164.022	96.857	91.8249	30.4856	115.819	78.7416	4.17843
FBgn0014930	4.98551	7.65758	7.83195	3.45455	20.0407	9.8554	3.5136	3.56797
FBgn0014931	22.4662	33.7984	0.916552	0.855417	1.08789	7.23573	1.06419	1.20315
FBgn0015000	12.8505	67.2884	21.9998	1.64821	6.7867	40.0503	2.19884	125.416
FBgn0015019	992.875	650.259	382.88	454.246	523.459	277.532	228.796	469.794
FBgn0015024	208.964	679.472	221.698	226.304	350.341	532.89	475.071	889.859
FBgn0015025	8.24287	2.03152	7.87034	1.98552	2.06516	13.9413	2.05563	2.11588
FBgn0015031	4.76318	2.51214	9.97269	2.49443	8.31372	2.50754	2.52183	2.54726
FBgn0015033	1.66492	1.66624	2.94844	1.66086	1.67038	3.94718	1.66919	1.67692
FBgn0015034	2.15487	2.16689	8.25041	13.7563	2.20369	14.4119	2.19324	2.25937
FBgn0015036	1.79253	6.67733	2.2521	1.87017	1.80732	4.02167	1.80412	1.82465
FBgn0015039	6.73105	2.70136	10.455	2.6836	2.71503	7.00358	2.7111	2.73671
FBgn0015040	1.88396	1.89209	1.87136	8.59982	10.4347	3.56169	1.90992	1.95473
FBgn0015075	69.832	77.4069	36.1374	2.02878	6.81615	21.0536	2.47624	7.13205
FBgn0015218	478.099	696.614	255.243	153.02	177.92	96.8404	72.63	12.7431
FBgn0015221	339.903	644.056	790.425	1093.93	670.322	2838.42	2730.22	1825.87
FBgn0015222	536.5	693.17	1283.9	1082.09	920.887	3677.29	2884.16	3115.29
FBgn0015229	286.995	223.116	197.057	231.691	172.942	356.95	369.619	7.16905
FBgn0015239	67.0175	209.844	107.176	175.743	156.909	100.415	247.551	10.7321
FBgn0015240	78.6203	290.857	37.8258	1.02247	92.0175	38.8245	1.84405	21.5921
FBgn0015245	1698.01	1456.77	416.634	65.504	106.019	308.346	162.067	15.0452
FBgn0015247	86.6917	2.00341	54.4149	57.831	73.1354	101.577	2.28586	238.984
FBgn0015268	1173.37	1323.6	341.352	130.829	140.582	94.9086	5.24595	5.54285
FBgn0015269	166.284	136.114	144.844	2.01402	108.602	81.1122	204.819	242.471
FBgn0015277	9.31361	1.24783	22.7002	1.00593	1.39393	18.0187	181.796	1.58922
FBgn0015278	335.786	280.506	321.056	315.754	279.825	200.419	4.71173	275.139
FBgn0015279	120.705	72.5742	175.052	221.78	213.249	107.612	5.17842	125.507
FBgn0015282	215.53	452.16	227.173	268.831	227.29	118.546	137.496	265.14
FBgn0015283	338.68	119.02	159.216	154.267	39.4076	198.279	359.127	6.90996
FBgn0015286	321.988	262.743	413.529	464.576	155.771	338.78	398.069	49.7222
FBgn0015288	1656.83	1185.46	1621.3	1092.67	2016.68	733.063	640.713	522.483
FBgn0015295	42.9295	3.12962	27.6983	9.15356	58.3213	29.6601	3.23993	5.74287
FBgn0015296	23.2367	71.0284	36.1096	66.5471	6.47047	58.5557	3.075	3.46957
FBgn0015298	18.1589	3.24803	20.2021	13.4301	48.0179	9.298	3.31258	3.47545
FBgn0015299	6.98005	1.75819	4.39159	1.74163	2.22122	1.75393	1.76706	1.78975
FBgn0015320	144.47	279.29	40.2691	56.7002	92.332	81.4882	4.74096	282.472
FBgn0015321	232.047	124.467	92.3784	82.6223	90.3963	114.076	86.5941	4.03579
FBgn0015324	503.814	893.415	692.054	656.18	649.853	418.246	446.58	800.884
FBgn0015331	55.5403	1.53522	31.2972	1.0595	26.2634	45.2328	234.99	6.90036
FBgn0015336	2.50443	1.5801	1.57783	3.39298	1.58294	1.57915	1.58213	1.58746
FBgn0015338	45.0448	3.46614	12.8681	24.4799	34.074	27.032	3.55507	3.77593
FBgn0015351	6.84505	2.21584	19.0296	39.2957	2.30654	36.6255	2.28096	2.4411
FBgn0015359	47.9277	82.1099	19.4324	2.74917	3.72644	48.4026	2.11241	2.41946
FBgn0015360	53.5827	4.28161	183.914	108.825	155.253	100.296	170.552	183.758
FBgn0015371	72.6225	69.365	37.8738	1.55892	5.36686	1.39008	2.89724	1.84404
FBgn0015372	63.3168	131.021	84.2215	91.3788	123.12	82.0104	134.698	4.35095
FBgn0015376	71.3235	144.853	131.409	101.742	74.4965	104.516	2.62341	3.30697
FBgn0015379	14.8968	1.76554	2.56354	2.03431	9.169	2.18559	2.47751	1.85726
FBgn0015380	22.9164	5.89121	32.6852	30.8704	6.48074	13.1211	48.5113	13.9011
FBgn0015391	113.277	158.819	31.4142	29.3072	1.87159	24.2564	1.79977	2.22763
FBgn0015393	107.312	103.651	26.6475	0.908986	21.0712	2.08513	1.38813	1.70207
FBgn0015396	182.625	179.944	23.8293	92.679	11.7331	57.0757	9.48831	13.9557
FBgn0015399	270.245	203.391	264.388	343.951	462.378	446.008	326.577	246.546
FBgn0015402	44.3585	126.154	51.163	29.2729	10.921	41.2982	3.16183	6.34797
FBgn0015477	299.284	340.225	252.533	353.468	260.177	106.736	209.359	181.36
FBgn0015509	492.4	929.493	317.865	486.281	375.161	332.282	118.884	175.363
FBgn0015513	415.27	413.387	779.277	582.88	795.083	1109.92	2499.15	1131.37
FBgn0015519	77.9005	21.374	29.1287	82.7999	69.3437	57.4391	192.757	22.9872
FBgn0015520	121.694	55.3659	43.7603	66.0968	43.0286	7.02198	2.70227	3.17202
FBgn0015521	574.875	495.619	387.212	260.934	595.922	202.833	189.288	6.93127
FBgn0015522	48.5482	123.65	43.2374	49.7676	17.8808	59.4074	221.793	3.64177
FBgn0015527	280.318	220.514	61.8343	58.7727	32.2052	21.7644	2.02243	5.49514
FBgn0015541	148.439	632.562	165.529	189.448	218.344	231.111	181.527	106.498
FBgn0015544	11.7365	4.42588	7.66277	4.99792	4.21123	4.20441	4.20975	4.21955
FBgn0015546	52.8958	29.4728	12.102	3.07381	58.3612	22.7809	4.87316	6.00041
FBgn0015553	23.0035	36.8181	13.5726	4.08487	3.77391	29.6136	3.73988	38.0418
FBgn0015558	3.90404	2.41223	2.40507	7.98825	2.84017	2.40922	3.13276	3.60351
FBgn0015561	3.10284	27.6609	0.707703	0.645345	0.872316	0.757393	30.9386	0.99691
FBgn0015568	5.64368	2.03506	3.04733	2.02979	2.33361	2.03368	2.03798	2.49688
FBgn0015569	3.95765	106.121	30.0733	112.649	47.9418	71.6543	153.476	9.5068
FBgn0015571	92.9643	102.097	156.583	143.011	111.197	177.984	479.498	392.586
FBgn0015572	1.9104	1.99151	20.8396	45.2408	48.9751	15.1996	134.028	4.97464
FBgn0015575	2.39652	2.40271	6.599	10.7345	5.4384	3.01431	2.41646	2.45195
FBgn0015576	34.7437	3.39441	16.5345	47.6533	2.62597	13.1679	2.59773	2.77507
FBgn0015577	21.6152	81.2689	51.7288	74.931	59.9566	96.6999	84.7126	4.75658
FBgn0015582	36.2179	3.89895	11.6722	19.4274	3.31106	10.6103	3.29656	3.39057
FBgn0015589	462.831	810.447	248.415	158.417	394.169	140.79	262.808	122.904
FBgn0015600	654.479	800.881	612.943	1070.03	685.653	1223.72	756.721	722.496
FBgn0015602	96.8869	78.3094	19.45	0.983001	1.4589	20.8502	1.4108	1.69457
FBgn0015609	227.614	156.586	27.6634	43.0768	26.3965	105.941	202.2	279.773
FBgn0015614	165.936	267.083	90.6046	99.9916	132.898	135.321	269.28	185.718
FBgn0015615	102.48	3.03008	60.5431	58.2966	47.8259	42.6135	82.0433	3.81117
FBgn0015618	10.1063	4.80971	11.1927	12.1478	3.68299	3.65805	3.67761	4.66259
FBgn0015621	15.748	17.5737	11.937	2.83465	2.90065	2.8623	2.89242	2.94587
FBgn0015622	357.764	254.77	512.764	490.97	729.377	295.493	318.385	258.557
FBgn0015623	260.735	226.78	199.37	0.838196	64.3982	266.617	175.401	2.65633
FBgn0015625	195.976	311.165	20.8801	0.384723	0.9064	3.58232	2.1191	1.15188
FBgn0015663	7.04218	3.26327	8.84331	3.52116	19.1357	10.2051	3.28438	3.33931
FBgn0015664	167.14	1.35889	44.1269	4.23447	1.62641	47.0045	4.48087	158.686
FBgn0015714	1.30458	1.35441	5.07012	27.3003	1.49474	34.6194	88.4499	1.68362
FBgn0015721	2.17962	37.4779	10.9751	2.35929	3.65262	55.584	3.51019	9.87625
FBgn0015737	856.216	481.305	913.724	558.004	953.203	424.554	436.376	932.141
FBgn0015754	137.656	146.784	152	143.202	106.396	193.616	199.098	7.6889
FBgn0015756	1300.3	1197.13	859.428	415.316	939.667	360.933	20.8028	372.825
FBgn0015765	22.8226	34.4268	20.2698	2.74454	2.93348	13.7576	2.91087	3.05374
FBgn0015766	653.007	4.91603	330.822	331.184	206.716	367.181	248.766	794.53
FBgn0015772	282.923	472.486	371.598	427.291	203.488	632.205	719.267	695.151
FBgn0015773	42.8551	59.9871	5.91126	20.5621	36.0059	10.3913	8.5559	74.9826
FBgn0015774	10.5615	2.9286	1.31562	37.1076	43.0171	20.9313	138.895	234.466
FBgn0015776	398.152	142.936	580.624	421.865	665.668	565.76	101.522	1181.52
FBgn0015777	80.8519	89.3069	205.761	213.415	58.6702	121.961	80.7334	228.395
FBgn0015778	1075.7	1409.07	675.84	562.589	976.816	359.561	129.349	367.067
FBgn0015781	5.7576	3.12852	6.45176	2.82243	8.21978	2.83159	2.84167	2.85982
FBgn0015789	377.618	148.937	229.478	286.959	480.808	463.131	342.384	301.949
FBgn0015790	451.144	617.474	510.473	598.101	385.632	599.035	586.83	366.426
FBgn0015791	62.206	3.45135	68.3556	117.711	66.6061	107.118	92.8454	70.5914
FBgn0015793	18.1026	2.76834	15.5507	45.9722	4.60813	52.2766	70.4538	3.22633
FBgn0015794	52.7295	5.43925	29.9981	39.6248	32.0109	28.0469	6.01959	83.9023
FBgn0015795	61.6487	318.958	362.095	282.374	481.561	413.648	723.697	594.164
FBgn0015797	133.933	98.7226	142.367	231.844	244.966	120.778	4.68185	12.3831
FBgn0015799	302.313	105.501	145.363	42.2575	76.6688	65.6734	2.53527	253.51
FBgn0015801	78.3291	148.277	259.255	110.063	43.0377	266.838	155.879	7.1598
FBgn0015803	207.241	251.722	75.3749	60.1588	144.616	166.224	272.954	304.25
FBgn0015805	99.3595	74.3839	57.3562	2.45442	35.9512	50.0614	4.31056	3.04992
FBgn0015806	322.09	298.971	299.91	360.357	153.634	529.555	122.272	317.16
FBgn0015808	82.0264	173.383	73.2811	44.8151	2.70771	64.7832	124.168	3.24535
FBgn0015818	63.6106	2.90766	25.6154	1.54305	63.8164	40.6476	1.95424	2.24998
FBgn0015828	44.4081	32.9953	18.9967	3.55012	69.6407	16.0134	4.66742	3.49855
FBgn0015829	9.96114	1.99431	3.83036	1.96216	2.01812	9.29614	2.01135	2.05442
FBgn0015834	218.782	118.496	170.602	119.708	109.479	95.3048	108.867	211.481
FBgn0015838	115.816	1.26605	71.5361	1.23076	21.532	52.5358	1.47422	266.423
FBgn0015872	9441.09	10966.2	6611.63	10680.3	5515.58	33940	90437.5	18248.1
FBgn0015903	491.753	450.035	729.904	591.919	479.319	806.782	724.735	978.134
FBgn0015904	3.9652	1.94715	1.48489	1.47002	3.12196	1.49843	12.0199	1.57556
FBgn0015905	17.3278	3.36143	7.39256	14.7724	2.34973	2.29492	2.33818	2.41138
FBgn0015924	126.065	187.443	383.796	584.35	313.881	634.378	711.146	777.491
FBgn0015925	98.1364	84.0871	17.5916	46.9189	57.6534	35.4681	82.878	4.65111
FBgn0015926	52.1605	97.4889	7.30555	1.06037	2.77523	6.90408	1.39955	1.62991
FBgn0015929	80.1656	143.894	37.6885	1.02303	3.59375	17.8233	163.289	2.20714
FBgn0015949	129.805	99.4105	61.8535	38.6353	61.4598	92.0534	2.85807	3.46701
FBgn0016013	1.53734	1.53812	2.44757	1.53495	1.54058	3.33771	1.53987	1.5445
FBgn0016031	233.533	336.097	141.062	420.375	153.964	599.128	105.527	286.94
FBgn0016034	49.6186	98.9687	27.0295	32.9239	35.0635	7.97817	6.92855	6.85119
FBgn0016038	31.2719	53.8889	10.7262	29.3884	3.39414	7.08942	4.62721	5.5983
FBgn0016041	161.379	211.035	45.9024	0.565173	2.66906	12.8278	1.1093	1.45325
FBgn0016053	126.765	79.2047	47.26	207.169	25.5295	11.0394	130.237	3.37432
FBgn0016054	28.6946	209.074	0.883837	0.796138	25.5213	0.954893	1.09062	1.28973
FBgn0016059	373.88	392.738	520.239	672.649	515.609	800.945	782.926	1148.19
FBgn0016061	24.8916	139.466	18.9473	42.1769	80.2604	72.7252	10.898	120.361
FBgn0016070	1255.07	1525.63	179.816	199.505	43.1649	178.473	1.9637	369.067
FBgn0016075	3311.92	457.668	1175.51	405.463	755.93	137.093	354.496	18.8187
FBgn0016076	227.77	277.313	728.658	708.659	605.167	1275.79	299.292	888.991
FBgn0016078	88.7591	3.92028	201.884	91.7451	223.339	107.683	235.455	287.364
FBgn0016080	10.5829	2.77593	6.19994	13.063	3.42129	2.76913	2.79019	2.82742
FBgn0016081	283.023	927.709	711.923	637.853	750.722	747.209	785.452	721.967
FBgn0016119	64.9762	6.66789	40.4436	68.2881	47.4502	25.8219	5.15155	3.88014
FBgn0016120	300.056	350.097	190.744	167.12	155.926	61.8192	6.76566	103.202
FBgn0016122	136.635	1.4944	326.956	218.684	56.3362	434.477	710.345	5.54162
FBgn0016123	37.1168	158.288	71.5041	16.5382	48.0623	125.645	280.822	179.802
FBgn0016126	28.9882	65.3383	187.7	185.236	270.289	176.618	434.799	452.775
FBgn0016131	8.00147	3.71276	4.03288	3.70757	4.32539	7.61737	3.71567	3.72351
FBgn0016641	112.526	292.506	39.9992	93.1045	86.3006	73.9237	2.19322	2.85654
FBgn0016650	1.50636	1.50707	2.23627	1.54473	1.5093	3.19916	1.50865	1.51286
FBgn0016660	1.43125	2.44842	26.2333	2.14997	28.6124	16.4026	1.58923	137.546
FBgn0016672	21.5481	199.862	13.6398	1.09107	1.20497	19.6552	2.4682	1.44377
FBgn0016684	4.80159	2.07538	5.27952	2.06912	2.39956	2.07374	2.07884	2.08804
FBgn0016685	787.668	533.502	273.959	121.803	244.76	50.5403	94.1	3.07655
FBgn0016687	217.467	177.802	101.771	127.747	107.119	120.652	2.31118	3.05072
FBgn0016691	68.2605	76.7067	77.3672	94.9296	179.373	56.501	5.16266	6.95844
FBgn0016693	120.774	261.265	353.806	221.747	244.643	319.467	398.379	479.372
FBgn0016694	265.854	870.86	334.334	209.148	18.7601	401.836	970.041	371.475
FBgn0016696	428.666	228.012	157.951	193.902	116.108	427.124	480.435	175.598
FBgn0016697	40.2647	3.0379	64.7532	3.28386	88.6561	5.64417	3.50681	4.61328
FBgn0016698	6.8353	3.67636	7.49126	6.13276	3.68597	9.1944	3.68319	3.7015
FBgn0016700	222.087	209.239	257.391	158.792	369.568	266.492	331.865	471.293
FBgn0016701	32.3172	2.53963	32.1527	2.33516	32.8152	49.2315	2.64137	4.96448
FBgn0016715	1.65789	1.69004	14.4115	1.54953	2.9256	19.0112	37.2065	3.53918
FBgn0016726	429.285	404.018	330.395	96.2685	145.305	125.004	4.50534	360.36
FBgn0016754	160.243	467.041	524.969	298.048	196.219	316.576	800.058	426.661
FBgn0016756	351.485	182.689	373.953	88.6889	484.519	526.499	359.402	809.262
FBgn0016762	8.47714	21.2653	3.91947	1.86249	9.07059	1.9183	1.97508	2.06783
FBgn0016792	130.954	214.103	24.6668	1.24462	24.5362	50.5209	46.439	2.59772
FBgn0016794	190.509	93.9293	284.05	224.699	401.621	291.776	127.413	267.807
FBgn0016797	251.006	436.234	212.039	334.921	78.8705	187.161	142.048	10.251
FBgn0016917	396.812	591.543	424.474	502.803	195.471	220.048	247.065	435.93
FBgn0016919	1.80967	1.81219	1.80582	4.97983	1.82004	5.07339	1.81779	1.83234
FBgn0016920	14.2771	67.2151	2.36485	2.60343	17.835	12.7104	3.76279	6.24328
FBgn0016926	284.018	161.278	544.942	216.369	310.935	268.736	503.133	411.95
FBgn0016930	421.477	358.76	1196.81	1037.52	971.625	1418.5	1108.51	1696.64
FBgn0016975	4.32963	3.2186	5.39269	3.24679	2.80456	3.46017	14.1294	5.99755
FBgn0016976	4.32963	3.2186	5.39269	3.24679	2.80456	3.46017	14.1294	5.99755
FBgn0016977	2210.56	2030.06	2999.01	2531.11	2961.84	5225.78	2445.18	3500.04
FBgn0016978	170.294	190.515	85.7992	5.86824	39.9465	48.482	2.3683	180.332
FBgn0016983	292.983	94.1806	97.7492	55.8791	135.29	39.5298	4.43994	6.24713
FBgn0016984	371.436	336.807	737.504	957.645	350.38	969.095	2200.09	1295.59
FBgn0017414	4.02154	1.71071	1.70416	1.70009	5.27949	1.70796	1.71645	1.73129
FBgn0017418	180.492	78.5008	129.514	311.353	250.663	290.294	273.899	309.928
FBgn0017424	30.6917	227.925	0.576052	0.513066	0.7687	0.625724	0.726371	0.975083
FBgn0017429	102.841	2.55768	27.4272	40.231	83.3634	12.7216	82.4743	3.25721
FBgn0017430	6.4585	1.48409	3.4391	1.46838	1.49574	1.48007	1.49243	1.51351
FBgn0017448	2.94299	1.50699	1.49954	5.63473	1.51606	1.50387	1.51347	1.53002
FBgn0017457	104.521	104.533	56.6098	82.278	26.2414	34.892	5.06416	3.72334
FBgn0017482	13.1657	3.64104	7.03816	17.6978	3.66965	13.6656	3.66142	3.71514
FBgn0017545	1619.9	2279.8	1350.24	977.798	1402.99	715.313	831.274	2128.98
FBgn0017550	322.676	296.197	159.542	165.818	167.509	186.376	237.238	236.55
FBgn0017551	1054.85	0.882802	10.98	0.741251	1.00477	0.849525	0.954679	1.24543
FBgn0017556	5.30769	1.41084	3.71716	22.0915	2.3242	2.32583	1.44944	1.54012
FBgn0017558	79.384	166.091	175.415	186.58	356.674	126.225	252.348	95.3827
FBgn0017561	170.978	2.84006	34.6039	1.13522	52.9859	24.0081	1.79154	90.9001
FBgn0017566	254.163	54.187	206.926	193.855	345.097	92.2533	184.483	3.49402
FBgn0017567	50.2052	1.9769	25.7872	45.6451	12.9539	1.92931	2.07141	2.29256
FBgn0017572	104.9	2.47887	99.7353	127.619	177.247	96.8032	94.9958	245.168
FBgn0017577	23.1473	27.2547	9.47524	1.77212	1.49245	1.38038	1.46988	1.60576
FBgn0017578	11.9916	220.221	14.2442	0.876539	29.6736	72.461	2.95457	1.8479
FBgn0017579	821.115	506.499	850.611	331.862	979.986	489.041	8.39798	629.851
FBgn0017581	1732.94	2551.15	1386.65	1360.85	1674.22	1963.33	1355.54	1668.89
FBgn0017590	3.4637	6.36766	9.19245	32.02	6.21438	4.58513	5.86635	127.872
FBgn0019624	323.307	146.385	222.645	156.502	200.121	85.3827	112.663	3.6523
FBgn0019637	103.834	150.119	44.2829	42.3157	39.7809	36.0972	2.75903	3.31126
FBgn0019643	3.16991	3.17815	13.7274	3.28239	12.1694	15.8451	3.84327	3.2451
FBgn0019644	129.904	332.104	134.731	53.7901	160.576	1.16249	1.53835	2.08975
FBgn0019650	11.2548	74.1226	7.5499	77.6878	35.338	44.4669	6.24488	3.60199
FBgn0019662	88.012	56.3876	102.454	55.327	69.2307	134.561	179.967	124.532
FBgn0019686	118.568	91.6781	35.1299	2.66773	15.289	29.7187	2.39111	7.55023
FBgn0019830	77.7341	2.16179	87.4723	51.6776	88.7699	71.9434	2.44493	198.679
FBgn0019886	395.307	193.159	206.596	267.099	192.008	393.602	90.6599	423.636
FBgn0019890	284.11	169.931	403.659	544.31	314.073	1090.83	1785.09	394.85
FBgn0019925	173.849	6.3084	197.979	248.432	487.363	55.672	170.224	576.507
FBgn0019932	5.31824	2.74618	6.48056	2.90084	8.03615	2.74304	2.75281	2.7704
FBgn0019936	975.946	799.541	578.883	817.948	1013.84	325.602	19.2607	1085.56
FBgn0019938	273.044	384.229	77.9205	1.50615	49.2079	42.2723	131.779	10.9658
FBgn0019947	83.1962	37.2828	75.9325	3.74103	42.4131	48.2203	2.72201	3.14462
FBgn0019948	14.4717	104.462	75.9634	125.274	126.825	67.1348	112.543	384.883
FBgn0019949	9.11492	61.0566	10.8444	2.42897	19.7172	7.37926	3.78781	2.81111
FBgn0019952	9.75744	1.93908	50.3666	122.735	4.01166	50.9826	3.79166	104.051
FBgn0019957	115.001	92.9212	95.3297	80.851	158.25	4.08365	4.06196	2.82682
FBgn0019960	237.83	258.358	174.215	47.6218	244.307	54.5332	4.32749	570.769
FBgn0019968	361.069	877.474	345.701	195.099	508.318	558.017	1090.83	803.045
FBgn0019972	37.8833	84.526	194.793	179.469	117.705	128.408	152.047	285.041
FBgn0019982	67.1406	4.14727	22.3603	36.6641	52.5668	22.0587	3.12517	3.44384
FBgn0019985	3.86046	2.89034	2.87366	13.1427	11.264	6.47164	2.90506	2.94351
FBgn0019990	89.9453	175.088	47.9385	41.6888	2.74561	112.592	4.58428	111.194
FBgn0020018	7.31036	2.98559	5.82244	15.4774	4.16447	3.91376	2.99922	3.03495
FBgn0020224	159.541	198.856	77.0579	38.3403	2.48698	57.9864	81.4024	3.02852
FBgn0020235	354.344	29.9999	264.257	231.303	298.012	124.175	4.39415	432.137
FBgn0020236	487.313	207.21	242.461	244.031	271.18	175.294	192.536	13.6099
FBgn0020238	1075.82	914.731	686.786	967.294	741.314	454.109	1304.55	1036.4
FBgn0020248	118.978	61.1217	16.5397	42.772	17.1135	59.7798	158.958	12.6893
FBgn0020249	84.9553	105.05	92.8626	122.605	99.6927	66.7465	329.054	542.197
FBgn0020251	228.541	73.4783	168.037	549.975	115.435	218.609	325.367	24.5581
FBgn0020255	736.966	1323.86	398.47	244.775	462.131	291.919	81.9863	3.2635
FBgn0020257	55.0187	71.2272	57.5428	62.8645	45.7376	30.4732	3.7968	4.26979
FBgn0020258	1.87918	1.76404	3.10809	1.7613	1.76618	3.32773	1.76556	1.76963
FBgn0020261	184.596	112.877	120.277	1.14472	176.728	98.2923	136.725	2.9128
FBgn0020270	10.8989	2.71769	2.68524	24.0677	3.61983	24.335	2.74625	2.8206
FBgn0020272	12.4447	3.06215	6.28164	14.2865	2.63161	2.59897	2.62464	2.6696
FBgn0020278	196.958	319.144	490.766	805.069	856.492	673.324	884.145	390.16
FBgn0020279	1713.02	1873.45	1927.83	1037.21	1767.36	1476.65	1428.01	1745.23
FBgn0020294	130.794	3.62131	186.557	317.655	255.338	142.084	17.3657	204.867
FBgn0020299	69.7089	5.75499	44.8707	41.7582	54.2647	74.4906	64.7913	10.5663
FBgn0020300	32.6832	4.62307	11.0317	16.7867	32.5704	38.045	3.76518	3.96355
FBgn0020304	550.911	316.671	681.071	735.091	544.978	1435.57	1109.81	1086.42
FBgn0020305	15.9477	1.07048	7.02186	1.0127	1.10892	1.05641	1.0983	1.17311
FBgn0020306	2464.39	1872.27	1094.93	715.595	1062.83	967.665	420.872	917.125
FBgn0020307	3.8127	4.58118	19.162	21.1289	28.4703	17.1746	3.88211	5.65596
FBgn0020309	560.146	154.355	634.754	503.162	936.88	1476.02	753.274	550.965
FBgn0020312	132.721	59.7563	25.8867	48.628	114.267	98.6733	2.42296	379.591
FBgn0020369	103.527	324.931	93.4777	0.990778	50.3957	82.1965	1.90506	39.3957
FBgn0020370	353.307	402.664	439.098	156.872	341.374	114.431	212.725	325.826
FBgn0020378	4.97332	6.0162	6.53505	5.40503	7.35817	10.8826	6.43166	9.071
FBgn0020379	21.1254	3.70215	17.8447	4.5614	53.046	10.9022	4.92494	17.2885
FBgn0020381	44.0799	2.19507	16.8737	37.5399	2.32907	40.5893	2.29177	2.5202
FBgn0020385	102.072	187.78	43.1855	77.4669	3.87896	25.6094	1.9504	2.44756
FBgn0020386	637.155	817.469	571.108	812.241	741.605	846.22	965.753	193.519
FBgn0020388	95.2391	3.4544	29.8459	0.851109	3.16457	90.0044	1.46048	164.748
FBgn0020389	60.7736	10.6946	128.346	56.0575	57.8784	75.6999	89.1819	4.2161
FBgn0020391	16.4356	3.71194	6.47058	2.98657	25.1413	16.0655	3.0939	3.18876
FBgn0020392	116.529	72.092	63.9396	37.7056	42.2189	37.3391	3.22856	3.74844
FBgn0020407	3.94849	1.82853	3.82333	1.87348	1.83167	1.82747	1.83076	1.83671
FBgn0020412	551.189	419.705	274.583	123.047	218.353	244.288	585.119	202.57
FBgn0020414	15.2597	3.49497	23.5945	14.0478	3.56077	29.6368	3.54199	5.28127
FBgn0020415	1.26406	22.969	13.2173	1.19059	1.34844	5.6385	1.33112	1.43547
FBgn0020440	180.94	198.805	191.614	136.758	166.886	105.722	130.726	335.797
FBgn0020443	1158.43	1435.85	876.24	635.319	922.768	305.144	934.011	598.601
FBgn0020445	141.103	131.37	71.8987	87.1114	18.6547	36.3937	10.9824	3.5942
FBgn0020493	152.554	127.535	352.868	281.145	270.575	115.749	321.279	7.09132
FBgn0020496	499.581	926.259	421.131	194.039	373.7	682.192	420.939	296.462
FBgn0020497	232.666	109.979	165.451	210.913	304.402	83.6292	255.181	7.20345
FBgn0020503	225.216	562.072	267.815	286.606	322.962	203.876	17.1566	70.4887
FBgn0020510	191.506	184.872	188.182	56.3351	188.198	163.973	271.805	7.31937
FBgn0020513	171.285	167.212	41.428	0.748518	3.03894	30.1337	1.35875	4.06424
FBgn0020521	3.06838	2.68955	10.6877	2.65639	2.71469	8.39098	15.4281	2.75396
FBgn0020545	75.2756	1.18644	40.4277	0.810641	1.40261	128.213	80.2145	1.68778
FBgn0020616	43.1755	2.47476	21.2533	2.32209	28.0823	20.4583	2.55194	2.73878
FBgn0020618	2631.1	1568.16	2079.96	997.666	1467.51	1033.42	593.603	793.218
FBgn0020620	41.6108	5.44527	96.6282	173.587	135.975	107.498	2.02473	2.59487
FBgn0020621	445.781	760.868	527.3	599.826	594.726	598.442	477.903	370.824
FBgn0020622	167.683	65.7804	224.39	80.5746	230.24	100.355	163.989	271.502
FBgn0020626	168.146	133.772	269.253	221.649	259.009	179.778	132.742	346.796
FBgn0020633	106.652	52.2648	26.8458	40.9244	39.633	20.8012	5.76728	7.21033
FBgn0020647	247.13	187.816	391.147	468.479	316.186	1131.71	897.681	513.193
FBgn0020653	671.378	695.559	518.752	583.515	733.655	674.25	338.016	486.156
FBgn0020655	183.661	3.15342	103.582	37.0697	129.385	55.3418	3.79699	2.58944
FBgn0020762	133.559	329.374	553.174	483.227	375.267	1495.41	2206.62	1383.06
FBgn0020764	110.519	2.22094	171.114	151.977	79.8537	279.537	27.8004	138.299
FBgn0020766	38.4198	2.11902	34.0397	41.061	2.27469	50.2501	2.23156	2.49387
FBgn0020767	69.0873	7.31673	34.929	29.1788	58.4207	51.4089	4.07844	13.3094
FBgn0020887	128.867	90.4407	83.9048	48.7989	118.486	84.5512	60.0674	4.52733
FBgn0020906	0.509281	357.588	0.444237	0.361227	0.70486	0.506815	121.483	0.916854
FBgn0020909	18.924	152.837	14.3368	17.4859	2.93716	1.2934	1.47451	1.73754
FBgn0020910	5351.61	5708.24	6241.26	1999.29	5561.26	3764.82	2085.08	5126.51
FBgn0020930	42.7694	5.10842	26.6209	45.9741	23.2723	39.8579	88.1804	4.38069
FBgn0021750	46.5796	91.3152	11.7842	1.85221	22.1449	20.6637	2.26107	2.5652
FBgn0021760	555.743	751.642	457.913	431.938	418.942	320.506	327.145	213.431
FBgn0021761	186.369	339.884	50.2995	79.6312	1.75114	112.783	3.34199	2.22753
FBgn0021764	1076.86	684.899	527.834	576.386	458.76	815.534	171.778	446.637
FBgn0021765	252.585	251.449	183.321	132.257	161.616	152.097	390.526	385.501
FBgn0021767	2.64386	56.5286	85.6056	83.7723	32.8689	371.273	607.577	598.05
FBgn0021768	180.09	42.6624	52.9876	103.587	4.28128	84.6792	2.24255	5.56983
FBgn0021776	2.21023	53.8623	19.794	13.1947	2.33288	15.2482	2.30688	2.46966
FBgn0021795	138.372	55.1577	214.475	43.2415	416.121	86.4206	3.84882	2.71081
FBgn0021796	188.161	239.377	157.029	89.6429	127.072	68.8958	95.2414	127.193
FBgn0021800	72.86	218.281	29.3696	49.8833	33.0601	9.86978	170.566	3.19015
FBgn0021814	10.4123	2.79889	8.57002	2.77825	2.81474	7.89228	2.81018	2.83984
FBgn0021818	99.0081	184.258	105.587	2.17374	82.2371	59.5317	118.531	251.339
FBgn0021825	35.0813	84.2798	39.15	1.96342	13.1425	52.558	2.42458	2.76794
FBgn0021847	17.9339	3.83984	13.9507	23.8521	6.80607	27.0128	3.8858	4.00406
FBgn0021856	12.6972	3.33472	14.947	3.26206	20.6107	22.5386	3.37362	3.47323
FBgn0021872	340.525	617.04	740.35	730.738	785.454	859.361	599.442	1793.79
FBgn0021874	74.0286	64.0621	18.7768	36.2802	39.4478	14.3669	3.5479	3.92266
FBgn0021875	20.1422	78.8421	18.0675	1.69862	2.04312	16.1828	2.00535	4.18974
FBgn0021895	667.585	138.466	270.077	196.984	297.933	369.733	348.039	208.36
FBgn0021906	229.986	380.527	127.17	71.9614	113.439	39.2317	2.06626	5.75694
FBgn0021944	66.0375	134.876	22.8696	30.1951	4.30689	3.21322	61.2255	2.84828
FBgn0021953	178.699	224.008	121.28	254.058	72.2459	40.6346	4.12166	2.94116
FBgn0021967	99.5088	95.5706	62.3947	80.864	47.7083	67.1108	3.11465	3.71192
FBgn0021979	147.592	78.1909	142.8	119.333	115.091	87.8918	4.73225	3.44685
FBgn0021995	506.188	263.587	86.2423	154.731	39.972	24.1342	132.535	6.3239
FBgn0022023	412.9	260.62	391.591	81.1781	320.677	349.82	161.982	424.273
FBgn0022027	16.2448	2.88363	22.6155	2.76782	32.1669	23.787	2.94395	3.09402
FBgn0022029	131.476	123.447	42.2761	33.8345	58.1314	117.207	3.12044	14.4137
FBgn0022069	282.919	240.725	100.327	66.6908	49.6238	57.8634	4.39203	9.01539
FBgn0022097	226.583	251.889	152.767	114.293	202.535	115.301	266.142	261.995
FBgn0022153	207.986	76.4213	88.6226	55.2247	84.929	77.2873	2.99181	191.639
FBgn0022160	27.9531	2.53735	93.9023	0.728036	61.8394	130.137	381.262	4.62215
FBgn0022213	287.989	371.331	45.8713	49.9712	82.7944	82.8929	4.51253	183.216
FBgn0022224	6.76453	1.93822	2.66305	1.92358	1.94931	4.72	1.94613	1.96658
FBgn0022238	120.049	240.24	139.092	240.205	175.97	70.2351	263.422	7.29825
FBgn0022246	4.55767	17.1756	5.92425	1.27808	1.38346	1.32514	1.37152	1.44461
FBgn0022288	142.965	1.23958	29.6143	29.9268	1.37775	1.18709	1.34016	3.43762
FBgn0022338	272.527	1.15592	8.32858	1.01247	1.24765	10.4696	1.22246	1.3781
FBgn0022343	460.025	458.103	216.128	239.074	145.875	109.245	169.025	212.324
FBgn0022344	31.3425	62.5884	27.5446	33.6946	3.05498	10.7055	3.01221	3.27753
FBgn0022349	682.618	413.488	246.981	191.381	194.373	106.854	62.7578	317.694
FBgn0022355	1.42611	1.43433	4.80135	10.9223	1.45918	1.42558	1.45218	2.36052
FBgn0022361	63.0865	61.3067	57.9507	5.84811	38.2738	67.3616	103.467	4.209
FBgn0022382	508.786	664.157	1125.44	1795.86	1086.47	1907.24	2359.92	1112.48
FBgn0022699	49.5683	4.45736	29.6807	38.2082	5.03206	15.9252	8.83878	3.79087
FBgn0022700	1.39992	1.4054	2.63885	8.86949	1.42206	1.67975	1.41735	1.44694
FBgn0022702	139.724	2.40258	103.406	97.4131	24.6553	123.459	110.436	238.242
FBgn0022708	305.121	227.025	159.49	190.652	48.6904	46.907	6.5956	292.774
FBgn0022709	2.10365	1.55367	1.98063	1.55287	1.78867	1.55346	1.55412	1.55533
FBgn0022710	92.3016	37.0768	143.663	161.613	58.8683	186.569	110.685	143.676
FBgn0022720	66.4843	80.6642	54.1667	62.6995	4.95769	24.3137	4.73356	3.45994
FBgn0022724	6.02298	1.71571	4.6803	1.70179	1.72618	1.71212	1.72319	1.74238
FBgn0022764	820.673	1082.05	607.681	249.488	707.622	765.164	597.054	459.644
FBgn0022768	424.17	517.855	318.594	395.229	146.451	220.939	243.159	504.279
FBgn0022772	89.5619	1.7469	73.6885	0.487255	0.960515	164.397	0.915257	1.17876
FBgn0022774	166.833	7.92375	311.803	130.12	208.752	132.846	389.646	493.16
FBgn0022786	86.3289	327.038	16.7923	0.578132	1.26495	8.92411	102.753	1.59539
FBgn0022787	219.001	315.29	277.953	372.825	371.494	327.285	382.449	388.216
FBgn0022893	1460.19	2507.27	342.761	296.862	530.109	185.069	181.283	12.6662
FBgn0022935	50.1641	36.7206	24.6647	2.1847	68.4791	61.2466	2.67144	3.0388
FBgn0022936	11.7481	213.878	9.95554	0.88924	24.3721	1.07793	1.23906	1.47025
FBgn0022942	230.688	169.812	125.588	35.3508	72.1125	57.4329	280.627	6.99205
FBgn0022943	11.4359	2.61159	10.0962	2.57649	14.1929	2.60252	2.63052	2.6794
FBgn0022959	671.07	407.268	390.989	88.1557	421.574	40.1104	189.022	283.378
FBgn0022960	113.307	3.80447	99.283	80.0303	103.284	62.0682	4.47757	6.07773
FBgn0022981	71.4475	134.355	4.37677	1.01132	11.7716	0.860634	1.03399	1.27573
FBgn0022984	48.3532	3.57902	32.1665	23.1568	25.3702	29.2947	3.67787	3.9224
FBgn0022985	149.086	95.195	81.3806	30.337	31.4828	15.6941	2.7618	183.692
FBgn0022986	17.3691	82.7682	48.1692	24.5659	22.3295	18.1825	5.43249	4.2
FBgn0022987	36.2523	100.925	40.3181	39.5292	97.6419	40.208	3.2326	3.73772
FBgn0023000	21.1632	2.66474	29.0534	2.36178	4.56501	34.3765	68.7146	67.5882
FBgn0023001	93.8009	3.06084	80.2402	37.3442	189.661	70.1046	1.9649	2.48142
FBgn0023023	6.54437	4.60865	10.6944	4.66804	4.99416	9.6666	5.29047	5.22776
FBgn0023076	75.8288	111.821	91.3281	126.088	70.4231	186.088	65.762	133.765
FBgn0023081	170.116	256.378	102.14	157.67	88.573	100.712	2.83868	142.882
FBgn0023083	310.507	715.685	288.368	475.456	378.715	643.915	625.928	6.99625
FBgn0023090	5.0863	1.63678	3.36403	21.0859	1.74502	5.51199	1.71505	157.101
FBgn0023091	2.51306	2.54609	16.5859	40.0865	2.64549	31.1996	18.4938	2.79202
FBgn0023094	48.9055	3.42213	38.6318	52.2878	45.3279	28.651	3.56034	6.36722
FBgn0023095	343.608	500.451	643.169	928.74	421.844	1573.06	1549.62	508.017
FBgn0023096	38.9604	48.9529	32.4075	62.1617	44.6603	71.9718	3.73142	159.43
FBgn0023097	399.178	425.652	115.475	204.784	84.5911	113.942	3.86232	2.78604
FBgn0023129	88.3139	79.7037	88.3269	203.982	97.5354	81.6047	139.136	7.89796
FBgn0023130	18.414	19.9458	1.31083	1.19726	1.6376	52.2434	2.92219	96.1373
FBgn0023143	1344.94	1787.54	769.115	680.204	1175.92	570.401	77.6127	419.464
FBgn0023167	134.266	95.6119	109.244	59.0108	68.5863	121.27	158.983	172.008
FBgn0023169	116.954	174.169	90.8168	153.753	110.629	123.411	390.559	7.23305
FBgn0023170	197.14	1.45179	52.3366	10.2699	48.6378	58.5059	1.63821	2.052
FBgn0023171	19.5621	1.81621	10.2707	1.74518	1.86644	7.37541	2.64713	1.93998
FBgn0023172	378.659	804.242	434.509	546.042	276.94	443.167	330.096	505.137
FBgn0023174	150.189	68.4074	57.3643	1.29416	56.7786	38.2012	1.96038	2.41377
FBgn0023175	193.228	59.2391	79.868	80.0812	31.6476	81.3257	5.52641	26.0333
FBgn0023177	77.5805	67.7834	38.7727	61.2392	5.61418	55.6908	11.9786	4.05008
FBgn0023180	4.94173	2.70142	4.77311	2.69573	2.70588	5.31851	2.70459	2.71309
FBgn0023197	0.752141	18.9701	0.710168	0.660309	1.72991	0.750518	25.6717	0.955401
FBgn0023212	30.3153	170.102	52.2161	33.165	1.95721	22.6625	1.88963	2.29317
FBgn0023213	1258.2	1976.66	1281.71	562.487	1115.13	494.356	516.628	1175.38
FBgn0023214	61.1863	114.58	104.206	159.744	130.225	97.6215	5.43066	203.242
FBgn0023215	167.789	567.857	293.282	220.199	509.124	338.545	782.186	711.867
FBgn0023216	36.4226	2.51495	14.8536	2.32768	56.3659	25.8178	2.60899	6.52979
FBgn0023388	155.928	375.734	81.1065	106.581	161.696	47.921	2.01334	2.7179
FBgn0023395	35.0984	361.299	0.573376	5.89028	0.81617	0.647798	0.783874	1.05726
FBgn0023407	300.927	339.338	505.439	1147.7	579.807	956.522	1473.7	999.379
FBgn0023423	335.737	374.196	274.552	363.18	508.023	251.156	299.309	207.306
FBgn0023441	509.567	439.827	793.253	850.251	683.121	237.33	389.413	356.54
FBgn0023458	745.959	1065.18	579.667	537.981	439.89	439.921	347.611	13.536
FBgn0023477	166.873	1.88893	114.354	88.0229	41.7133	49.0245	2.127	7.79185
FBgn0023479	1.78801	1.78956	1.78565	1.78325	1.79443	4.33762	1.79303	4.9192
FBgn0023506	85.3517	2.40052	65.6571	0.620552	77.8092	204.204	446.87	1.95664
FBgn0023507	17.2988	22.8299	1.37761	1.3365	1.50661	8.94586	1.48775	1.60203
FBgn0023508	206.583	111.132	219.17	154.094	111.332	234.135	335.183	3.6332
FBgn0023509	393.42	497.664	304.772	311.506	237.735	315.304	409.194	772.62
FBgn0023510	189.634	194.547	191.86	179.627	184.349	205.508	201.545	533.98
FBgn0023511	56.9974	1.75157	45.5599	1.85113	60.6307	48.2814	1.88799	2.19668
FBgn0023512	89.9673	235.563	50.8364	5.79276	45.0127	79.121	1.98205	2.51843
FBgn0023513	64.485	2.46795	17.5862	36.3712	4.37047	21.7138	2.61884	85.855
FBgn0023514	36.2715	2.19397	27.437	2.01384	47.4086	16.8027	2.28296	2.49421
FBgn0023515	200.143	356.72	22.3841	0.54166	2.83181	13.9162	1.17784	22.4316
FBgn0023516	50.2478	3.25586	37.4218	31.5234	3.53618	74.3358	87.7043	46.1223
FBgn0023517	151.221	186.272	109.201	127.915	250.207	2.66917	1343.84	422.053
FBgn0023518	283.364	256.612	189.511	98.7096	101.753	136.625	105.706	7.33961
FBgn0023519	20.8619	1.85872	10.9107	1.77126	18.9165	2.39744	1.90284	2.00921
FBgn0023520	3.85788	1.64331	2.80149	1.63814	1.64728	1.64196	1.64614	1.65356
FBgn0023521	7.74942	33.067	8.60708	1.91276	3.18399	11.3601	2.08162	2.21688
FBgn0023522	119.301	119.074	42.0456	83.772	7.35946	19.8717	2.27822	2.77177
FBgn0023523	1.5938	3.12912	157.511	195.685	92.0915	102.129	138.903	8.03878
FBgn0023524	9.53646	110.988	10.1785	45.0052	2.81517	12.4306	70.8664	7.84463
FBgn0023526	170.682	82.9257	171.268	447.206	209.438	333.41	203.656	239.795
FBgn0023527	65.0041	68.5728	9.82427	1.17053	1.53919	14.401	1.49997	1.73416
FBgn0023528	296.734	547.64	153.498	184.31	250.03	137.936	7.69862	6.24199
FBgn0023529	495.373	530.148	902.805	713.673	1402.35	228.93	267.512	1140.86
FBgn0023530	7.42522	2.84183	7.97566	2.82638	2.85376	7.80075	2.85033	2.87279
FBgn0023531	37.1767	108.904	42.1021	58.2051	8.84023	71.8834	6.93085	6.88463
FBgn0023534	1.1339	1.8931	1.3786	1.13325	1.13478	1.13388	1.13458	1.13658
FBgn0023535	8.54137	4.24644	29.2585	81.2567	51.2727	55.6118	4.77656	8.1525
FBgn0023536	23.8667	27.533	4.27924	2.71108	2.80998	11.1351	2.79772	2.87709
FBgn0023537	123.658	168.405	82.2993	53.9905	29.418	22.423	4.47435	3.18698
FBgn0023540	1.65218	1.69413	5.30998	25.0801	3.12302	12.3524	127.337	1.98535
FBgn0023542	105.267	1.63725	35.378	62.2797	1.83662	27.714	3.22557	2.10804
FBgn0023545	4.11099	3.05052	11.754	15.2759	31.21	8.83339	3.09099	3.19363
FBgn0023549	81.6639	3.02419	192.811	184.265	148.761	399.274	470.574	2.75989
FBgn0023550	1.7014	1.70514	4.87701	6.3628	1.7167	1.70117	1.7134	1.73452
FBgn0024150	23.3483	41.6585	11.4297	3.92156	21.8567	5.02816	4.92922	7.29646
FBgn0024177	89.9038	261.069	3.9125	0.520958	0.85717	0.68944	0.824867	1.09926
FBgn0024179	17.0442	2.26384	62.5103	27.7054	110.342	40.1374	5.91896	180.259
FBgn0024182	319.106	359.062	188.438	205.486	238.546	185.512	333.964	3.59985
FBgn0024183	652.976	588.547	112.236	157.312	4.06736	65.062	264.66	5.70355
FBgn0024187	218.334	523	220.427	89.9706	109.61	149.702	386.846	16.1471
FBgn0024188	17.9527	2.39604	12.6217	11.8896	2.43246	2.38346	2.42209	2.48823
FBgn0024189	4.04723	3.2369	3.23446	3.32831	5.59989	3.7779	5.80718	3.24504
FBgn0024191	13.686	37.7789	16.5686	6.31867	23.6407	3.32114	3.40364	3.54497
FBgn0024194	10.0569	21.9362	2.95697	1.39905	1.53776	3.82384	1.52211	1.61775
FBgn0024196	19.8074	4.23448	21.9037	43.0125	36.7662	3.26038	4.62481	5.56754
FBgn0024222	141.487	63.0264	32.6207	42.7092	76.3979	50.8121	337.796	3.35001
FBgn0024227	2.58417	1.66181	1.77579	1.77534	1.6673	4.51128	1.66573	1.67594
FBgn0024230	1.89518	233.337	18.086	0.978811	11.8725	1.88444	1.25983	1.45315
FBgn0024232	2.06637	2.07274	2.05653	8.96067	2.09246	8.74229	2.6125	2.97382
FBgn0024234	32.3137	89.8851	58.5998	46.2122	42.1468	22.2954	3.6269	4.06307
FBgn0024236	245.963	263.375	124.303	299.391	183.941	21.4881	2.34527	264.592
FBgn0024238	346.541	482.422	841.176	1292.98	467.527	961.577	751.947	944.822
FBgn0024245	17.0235	6.29404	13.3591	6.66181	8.88486	7.73439	6.42634	9.07433
FBgn0024248	39.6725	187.632	70.1317	2.44685	48.0314	65.8736	130.853	161.343
FBgn0024250	51.8144	3.94875	75.2627	242.175	130.163	121.324	87.2934	9.41132
FBgn0024251	319.106	359.062	188.438	205.486	238.546	185.512	333.964	3.59985
FBgn0024273	177.692	120.447	171.385	186.399	39.8321	219.281	159.999	231.153
FBgn0024277	525.187	718.34	335.459	674.32	471.514	365.899	595.515	1043.4
FBgn0024285	157.21	3.38262	79.9594	59.4604	112.284	49.902	4.02692	2.788
FBgn0024291	451.845	3.47612	310.237	253.984	168.296	378.22	397.316	703.186
FBgn0024314	150.137	3.34268	65.4626	55.8348	70.9207	50.5883	2.22469	2.71795
FBgn0024315	359.069	1.87694	127.802	259.042	192.663	603.875	437.147	378.3
FBgn0024319	2.62641	2.62916	6.22874	4.84755	2.63786	7.73639	2.63535	2.65175
FBgn0024320	199.166	5.1934	251.234	101.352	286.004	242.846	307.28	443.931
FBgn0024321	324.08	220.93	858.345	1307.96	823.575	1091.65	903.267	1342.54
FBgn0024326	74.1122	2.67309	69.8001	87.245	121.568	87.2121	126.992	6.7875
FBgn0024329	322.49	139.219	206.232	221.676	44.9195	116.508	2.54793	98.745
FBgn0024330	20.2577	2.44677	21.4199	5.82559	13.0921	8.55338	2.53174	110.188
FBgn0024332	112.598	254.937	19.1472	32.9891	1.12063	0.831918	1.06455	1.39385
FBgn0024352	502.703	512.076	180.137	113.823	3.56827	148.756	1.60749	5.00475
FBgn0024360	75.8298	1.44314	15.1198	1.03353	116.879	6.11594	114.907	4.36326
FBgn0024362	151.117	228.132	81.6096	1.66224	79.1347	73.3513	217.61	2.85422
FBgn0024364	358.198	264.557	64.7648	40.4117	3.3774	1.11057	246.382	2.06751
FBgn0024365	96.9062	2.29278	54.5998	194.65	35.8135	37.6307	12.5092	8.41345
FBgn0024366	22.0426	2.44966	2.77389	11.8753	4.16137	11.6483	2.48449	2.57174
FBgn0024371	45.7476	54.7073	10.5403	31.8213	27.8377	21.1975	4.14116	4.42553
FBgn0024432	67.8192	137.128	75.1469	52.5846	76.2742	108.816	104.389	4.52432
FBgn0024491	12.839	1.72698	11.444	1.85952	3.21819	23.0015	1.82422	113.863
FBgn0024509	79.9345	207.825	118.567	62.805	171.553	60.8721	2.33685	3.02204
FBgn0024510	276.659	184.674	198.793	144.399	186.753	228.27	4.98233	192.608
FBgn0024542	7.31798	3.90033	4.3493	4.00954	10.0627	3.89886	3.90346	3.91192
FBgn0024555	287.747	340.239	146.66	50.6534	211.901	74.439	4.61307	262.653
FBgn0024556	331.976	198.318	105.49	59.6713	133.65	37.3809	2.2096	8.69709
FBgn0024558	216.531	138.973	45.9161	36.1513	60.3897	54.5051	6.20512	3.24949
FBgn0024689	50.9181	1.48152	26.8594	2.19821	91.2477	8.41023	1.59599	1.85563
FBgn0024698	55.0712	55.2274	26.3884	1.84025	39.4236	2.03496	2.21915	4.6616
FBgn0024728	40.1601	288.598	44.6647	54.889	23.5708	22.9115	3.86799	2.64865
FBgn0024732	17.9187	142.984	43.1352	28.2913	3.9897	27.7638	2.21805	2.59741
FBgn0024733	1308.83	1425.68	1186.28	1162.04	1170.49	613.065	171.836	239.488
FBgn0024734	300.847	247.366	305.668	295.166	245.468	279.411	722.636	392.451
FBgn0024754	14.8383	4.65354	14.7312	15.4629	6.31033	15.6497	6.14868	4.74697
FBgn0024804	617.126	305.495	641.317	939.305	1512.1	445.592	535.441	306.284
FBgn0024806	253.28	210.1	226.369	438.659	155.525	199.115	141.508	501.608
FBgn0024807	295.729	287.34	287.982	231.43	298.98	183.105	4.74735	294.635
FBgn0024811	48.8763	128.526	22.7847	1.42838	1.52479	27.7292	1.47513	1.77087
FBgn0024814	201.071	120.694	229.364	132.505	299.494	114.131	113.415	233.18
FBgn0024833	58.1253	3.30136	27.2025	23.229	20.4344	20.8356	3.39738	3.63365
FBgn0024836	38.5409	38.6804	13.1171	24.2628	13.4648	14.9384	9.42604	11.5236
FBgn0024841	4.69696	1.87442	2.36615	1.86865	1.87888	3.17557	1.87759	1.88598
FBgn0024846	62.6549	48.2722	33.8834	37.0447	27.8355	7.59781	3.71059	4.04072
FBgn0024887	19.56	1.81033	11.9939	1.72875	1.86756	15.5088	1.85152	1.95084
FBgn0024889	162.304	265.418	64.251	96.8129	97.4719	87.6136	4.35982	3.13084
FBgn0024909	32.0447	140.671	29.8205	0.822616	1.28548	12.653	1.23977	1.50789
FBgn0024920	6.39814	1.84553	4.51434	1.83161	2.27774	1.84194	1.85304	1.8724
FBgn0024921	340.759	716.962	196.53	177.956	393.806	191.483	460.741	279.349
FBgn0024941	1.65208	1.42847	1.50621	1.56446	1.429	1.99812	1.42884	1.42986
FBgn0024943	2.75172	1.99086	2.91686	1.66358	1.5875	11.8168	2.14891	1.62584
FBgn0024944	1.29044	4.05905	226.534	273.483	54.1734	636.133	580.926	426.288
FBgn0024945	49.3315	108.19	41.3725	60.1463	49.3184	26.6849	76.7496	5.00992
FBgn0024947	7.67209	2.84275	26.6972	2.75651	20.1182	23.2878	2.88848	3.00428
FBgn0024956	36.6558	2.17131	14.9716	2.02492	2.27428	12.5554	45.3169	2.42451
FBgn0024957	89.0224	220.036	97.0437	263.511	175.029	49.4066	2.68639	107.709
FBgn0024958	27.6281	22.8341	19.5462	4.34697	30.5866	12.1653	4.51578	6.50846
FBgn0024963	2.80697	2.28326	5.05417	2.20859	4.73522	13.8213	23.0149	3.77219
FBgn0024973	46.5924	77.5678	12.2684	25.7701	2.5946	54.6189	2.53947	2.87535
FBgn0024975	3.74922	1.44046	1.94628	1.43491	1.44469	1.43902	1.44348	1.4513
FBgn0024980	4.41224	5.42799	32.0242	23.1791	15.768	34.0532	42.5156	8.69526
FBgn0024983	20.8637	2.26806	28.5636	32.3415	62.9816	2.21783	3.67495	2.60757
FBgn0024984	9.70617	18.857	3.86585	1.23266	1.35642	1.28844	1.34258	1.42668
FBgn0024985	281.451	466.611	187.567	160.399	312.844	268.874	548.81	6.98099
FBgn0024986	4.50176	3.0363	4.57057	9.5153	5.58629	3.0331	3.44628	3.06105
FBgn0024987	121.617	137.604	83.1455	2.05114	155.582	20.1636	114.978	6.15705
FBgn0024989	84.524	95.6397	80.4729	238.214	106.546	377.53	414.701	726.309
FBgn0024991	17.3993	35.8943	8.55625	2.88561	2.99525	10.9205	2.98164	3.06972
FBgn0024992	48.0568	101.217	36.8601	1.9509	54.1251	103.459	107.157	3.34481
FBgn0024994	59.7739	2.18836	139.781	51.093	159.06	34.6106	104.291	3.08844
FBgn0024995	7.68415	2.3464	1.97089	8.01079	2.00192	1.97903	2.48322	2.02818
FBgn0024996	105.354	1.74704	53.7578	30.856	3.75586	11.6586	1.93636	127.919
FBgn0024998	30.4413	100.809	32.97	2.65904	3.59115	21.2659	2.04379	2.32371
FBgn0025109	9.9694	4.72757	38.9942	26.9244	65.0026	26.5064	95.9341	6.65626
FBgn0025111	1614.48	2447.06	1680.6	775.28	2135.39	609.463	270.067	794.997
FBgn0025117	340.702	555.468	187.81	144.017	202.8	81.249	2.03648	8.70521
FBgn0025185	5.27304	1.78562	1.77899	1.77486	1.79379	4.68498	1.79145	1.80656
FBgn0025186	123.024	223.777	81.2232	84.7812	115.362	116.555	6.43709	3.38923
FBgn0025286	1489.27	2293.87	1256.95	703.13	1704.77	704.25	464.45	930.822
FBgn0025335	5.81277	3.37569	21.1373	13.3497	3.41624	15.1354	3.40464	4.78348
FBgn0025336	77.5187	23.353	15.5678	16.1097	29.047	2.53732	2.70312	2.96722
FBgn0025352	228.424	1.93255	194.657	185.894	183.847	148.7	111.295	6.20117
FBgn0025355	45.1398	71.7924	35.9887	2.80681	54.4367	42.7276	7.64078	3.69317
FBgn0025366	242.51	404.524	162.763	122.688	187.097	113.067	116.085	10.4731
FBgn0025373	3.57775	2.08693	8.13667	2.06355	8.51616	2.08091	2.09948	2.13168
FBgn0025381	316.393	127.273	212.068	256.501	158.6	605.843	304.584	453.518
FBgn0025382	43.8442	1.95972	16.0848	22.8932	2.02873	1.9357	2.97394	2.13272
FBgn0025387	3.31519	3.32323	3.571	13.1161	13.9254	9.45104	3.34116	5.35317
FBgn0025388	36.107	53.7672	4.04028	40.5859	3.25937	1.75191	1.88925	2.10421
FBgn0025390	2140.29	933.31	3475.83	1746.23	1792.85	10945.7	4700.34	4975.49
FBgn0025391	4.65711	6.07493	4.8499	5.04827	4.47207	9.87742	9.38199	5.06626
FBgn0025394	393.193	706.197	245.09	306.864	238.845	226.35	436.653	262.65
FBgn0025454	6.02936	0.937476	4.57291	29.0996	1.07115	0.885626	1.03511	271.959
FBgn0025455	465.867	649.522	325.366	363.965	187.938	257.163	215.291	473.341
FBgn0025456	30.0833	1.50308	43.3272	20.3552	1.76382	91.9598	1.69292	180.172
FBgn0025457	116.617	11.0825	18.6774	0.794731	1.24372	1.01283	75.984	1.46351
FBgn0025463	143.141	2.34185	38.1267	0.88643	78.2166	26.0963	1.39837	1.73158
FBgn0025469	1.98968	1.992	4.52572	1.98253	5.70164	2.54181	1.99717	2.01074
FBgn0025519	13.9438	3.99519	10.5878	23.5806	38.4147	5.4498	3.25662	3.39819
FBgn0025525	137.051	161.699	61.0648	87.8465	66.434	423.124	76.239	15.9168
FBgn0025549	73.931	75.0044	29.0487	23.7189	28.9726	29.9977	3.70054	4.09344
FBgn0025558	10.2863	3.76153	6.08874	3.7448	11.7279	7.20217	3.77083	3.79568
FBgn0025571	161.196	36.4302	89.0277	38.2974	50.6023	51.2583	2.76095	3.32194
FBgn0025574	162.835	540.597	292.524	273.297	354.984	236.314	147.918	265.735
FBgn0025582	327.101	252.683	241.238	216.944	6.71652	144.677	157.847	6.44313
FBgn0025592	43.0462	2.76772	17.0748	29.3958	29.9683	4.17292	2.84864	3.04645
FBgn0025595	1.81529	1.37308	1.88215	1.37246	1.37356	1.37291	1.37342	1.37435
FBgn0025608	89.1823	338.675	145.111	0.900865	216.794	119.014	3.85722	200.46
FBgn0025615	26.5184	2.21433	16.9979	22.7355	2.26769	2.1959	2.2525	2.34919
FBgn0025621	42.3272	2.99409	44.4574	1.78431	11.1085	49.4382	2.10229	2.34321
FBgn0025624	43.3377	31.1488	12.6192	3.38174	2.78172	11.3958	69.5864	3.011
FBgn0025625	1.92189	1.95439	8.09664	13.3134	2.05021	22.6765	42.0854	2.18718
FBgn0025626	78.8383	225.655	45.2745	1.37907	46.0713	29.6106	10.5969	5.40392
FBgn0025628	146.063	114.388	80.2931	38.1797	97.3706	24.7773	78.3789	128.788
FBgn0025629	22.3851	0.873624	11.3765	0.781309	0.930322	1.35569	0.914931	1.02139
FBgn0025630	22.374	2.76115	16.5133	4.76431	2.80504	11.1314	2.79253	2.8724
FBgn0025631	88.2833	124.55	218.914	244.526	88.0271	187.247	95.3412	134.707
FBgn0025632	100.238	131.193	104.812	279.509	65.6018	123.048	310.082	431.405
FBgn0025633	420.677	681.884	194.646	233.055	158.698	127.041	109.205	3.30696
FBgn0025634	13.6686	2.26346	11.7879	2.22145	2.29463	7.86429	2.28575	2.34229
FBgn0025635	33.6043	3.69881	14.9582	2.7028	2.93246	28.3969	2.90531	27.9749
FBgn0025637	403.952	224.88	176.493	247.725	69.0612	150.628	2.19631	11.6958
FBgn0025638	252.336	277.496	109.836	180.208	250.527	115.386	6.99216	125.535
FBgn0025639	759.659	538.712	401.746	127.087	256.282	309.64	365.416	13.2986
FBgn0025640	73.3884	88.5624	27.476	22.173	31.8739	63.3952	13.906	4.63193
FBgn0025641	352.087	335.483	114.955	97.7261	48.2451	122.338	31.5603	18.1953
FBgn0025674	90.9918	98.3934	66.1977	48.5713	71.3992	51.1682	15.6934	11.2648
FBgn0025678	265.32	7.73872	363.736	408.405	667.863	45.5453	7.04085	23.3972
FBgn0025680	30.8403	2.80049	28.794	2.6667	21.2478	24.1982	2.86938	3.03899
FBgn0025681	71.1569	532.861	160.38	127.299	55.7213	104.058	97.8224	285.245
FBgn0025682	211.02	1.81474	524.392	190.765	800.968	178.72	309.613	574.476
FBgn0025683	288.408	783.975	699.998	510.673	580.89	818.266	1018.17	1415.24
FBgn0025684	16.704	5.10623	15.4261	10.405	20.8465	16.0592	7.48989	5.22227
FBgn0025687	6.3866	3.99594	17.8752	20.5709	4.70846	9.17785	4.01257	4.05695
FBgn0025692	7.12701	3.69318	21.3238	25.6726	3.77998	25.5877	29.45	3.91265
FBgn0025693	58.6054	73.8697	40.5409	51.3184	3.8401	36.112	3.76412	60.8532
FBgn0025697	1.4474	2.22354	6.00299	21.2422	2.616	1.44556	30.4718	1.67435
FBgn0025700	111.135	13.368	199.362	105.459	454.776	17.5242	97.5376	466.729
FBgn0025702	1.61228	1.62315	5.14308	1.57825	1.6568	7.24012	35.0609	1.70865
FBgn0025712	2.24906	2.2639	8.96506	18.7221	18.173	2.24812	3.09347	2.37761
FBgn0025716	35.2965	3.93183	23.0746	38.723	39.3818	15.9848	4.0242	6.41957
FBgn0025720	55.0917	2.56561	21.602	2.70257	23.4292	34.3274	2.65901	4.90476
FBgn0025724	300.45	1.80595	386.486	410.122	550.045	399.583	95.1947	862.436
FBgn0025725	526.038	258.467	488.072	216.759	842.536	301.903	279.411	3.46042
FBgn0025726	420.392	767.944	350.531	381.183	587.723	380.628	349.579	10.3684
FBgn0025739	24.0877	2.34865	9.64656	8.28196	2.40387	8.64156	2.38826	2.48646
FBgn0025740	44.8399	2.69907	19.5898	45.3431	66.7352	17.4802	2.82843	3.13599
FBgn0025741	499.812	1110.41	627.234	529.525	827.779	760.953	171.05	448.488
FBgn0025742	72.5711	112.208	96.2391	49.2597	59.4194	48.5193	3.74487	122.792
FBgn0025743	114.231	2.21588	48.767	0.863262	2.81657	72.8869	1.31145	3.6718
FBgn0025777	52.1795	2.96087	23.2228	29.0573	3.07566	17.8633	4.28754	5.2232
FBgn0025781	14.7418	2.65532	2.11101	9.76531	2.17476	6.6446	2.16489	2.22734
FBgn0025790	35.6521	59.2516	38.2157	2.01496	2.388	22.1934	3.68876	2.60147
FBgn0025800	244.923	5.59343	204.82	59.7777	54.1433	94.8203	104.075	219.707
FBgn0025802	198.12	3.09369	79.9089	127.458	19.3252	109.008	1.98573	311.647
FBgn0025806	20.6747	2.4375	57.3369	56.9294	67.9688	53.3995	2.67343	152.17
FBgn0025807	11.7453	2.39499	3.64418	1.86555	11.356	1.89815	1.93208	1.98891
FBgn0025808	18.9598	19.5402	4.52968	1.15398	1.31771	1.22913	1.29989	1.40695
FBgn0025809	7.07953	1.66616	6.34135	1.64487	1.68192	1.66071	1.67744	1.70592
FBgn0025814	26.5522	4.86587	38.2591	64.8641	42.744	11.8817	71.2538	4.14371
FBgn0025815	40.612	37.6924	18.1478	2.15778	2.41164	13.0866	2.38229	2.56413
FBgn0025820	1.62236	1.62378	2.77378	1.61797	3.99925	1.62227	1.62694	1.63523
FBgn0025825	30.0852	73.743	19.7614	0.922935	1.44736	1.17881	2.7707	125.847
FBgn0025830	26.1567	3.26883	18.7652	14.8376	12.1274	3.24996	3.30812	3.40887
FBgn0025832	24.8252	50.4867	4.15519	32.1034	1.81901	1.66601	1.78806	1.97549
FBgn0025835	3.85247	4.70576	4.40194	3.72119	13.2887	7.49102	3.5101	12.7661
FBgn0025836	272.576	489.782	203.122	223.517	297.998	259.888	1.9794	2.81094
FBgn0025837	2.43782	1.69067	1.69007	1.6897	1.82365	2.29378	1.69121	1.69266
FBgn0025838	1.55017	1.96305	1.53826	9.82023	1.58103	6.64881	1.57446	1.61566
FBgn0025839	42.1347	55.5249	32.9046	23.0548	4.65816	2.95471	4.48778	5.54275
FBgn0025864	517.893	596.605	651.098	706.87	545.41	565.618	580.612	484.794
FBgn0025865	167.315	65.1876	656.699	657.822	386.916	468.063	4.27846	306.164
FBgn0025866	164.962	153.081	201.322	494.975	247.102	319.235	420.972	169.905
FBgn0025874	12.5611	2.76212	27.0405	5.97314	29.047	12.9046	2.87383	80.8571
FBgn0025878	15.882	4.55131	7.87649	9.9384	4.17221	10.7178	4.16703	4.20109
FBgn0025879	39.3692	4.28591	141.687	129.488	168.857	92.3295	114.247	208.959
FBgn0025885	297.9	350.32	275.556	131.292	234.977	363.237	187.165	753.862
FBgn0025936	208.347	261.045	112.554	28.0988	300.832	111.626	165.824	140.689
FBgn0026015	155.646	93.4963	65.8224	1.15779	62.147	32.683	1.85138	2.31715
FBgn0026056	26.7367	1.24066	7.33361	1.12746	1.3137	15.997	1.29363	1.41371
FBgn0026058	2.36895	28.2799	3.16118	6.84491	4.37728	3.28876	1.85372	3.37894
FBgn0026059	264.49	193.072	312.549	323.765	490.895	255.767	442.477	3.54655
FBgn0026060	502.936	298.939	170.16	215.704	135.08	117.941	373.298	340.141
FBgn0026061	96.5438	36.373	44.8805	6.78876	30.6302	50.3891	106.229	158.883
FBgn0026063	8.96364	3.13889	6.95959	14.7985	3.15945	5.413	3.15354	3.19197
FBgn0026064	8.96364	3.13889	6.95959	14.7985	3.15945	5.413	3.15354	3.19197
FBgn0026076	48.3045	1.71036	50.9909	3.93297	104.803	46.3289	1.86629	2.21689
FBgn0026077	1.4889	1.48933	2.318	1.48762	2.61111	1.48888	1.49028	1.49283
FBgn0026079	143.633	2.26525	92.8639	78.8492	117.373	48.6782	2.55235	95.5896
FBgn0026080	6.40753	4.38527	29.3663	162.022	109.908	22.2733	3.86091	11.4795
FBgn0026083	1037.41	1427.69	903.041	1026.16	695.339	661.173	1390.66	495.558
FBgn0026084	521.244	635.046	1443.46	1212.77	603.747	2392.96	2109.78	2457.42
FBgn0026085	32.0329	4.13309	19.3415	30.1839	31.1109	6.12057	10.6698	4.3809
FBgn0026086	102.901	331.237	163.406	79.3436	232.119	168.798	281.815	68.9185
FBgn0026088	11.0474	2.90152	4.71569	11.2663	4.02084	3.21488	2.91378	2.94596
FBgn0026089	28.379	47.2541	12.7262	1.98716	2.22942	11.1268	2.20177	2.37211
FBgn0026090	9.21317	3.45905	9.33571	3.41302	21.3595	19.2138	3.48424	3.5504
FBgn0026143	97.5139	52.8818	21.8163	2.30498	27.8713	15.0458	2.34692	2.67934
FBgn0026144	106.409	103.551	11.9906	1.16233	22.8615	13.4757	1.66989	2.01359
FBgn0026147	139.027	12.5872	38.0368	1.18616	19.3371	76.1954	1.73259	2.10293
FBgn0026148	2.05405	1.55041	2.07217	1.54961	1.55104	1.7338	1.55086	1.55206
FBgn0026149	73.0417	167.021	29.3005	37.3284	4.43392	37.3754	2.46889	7.94996
FBgn0026150	56.2346	71.2147	71.0102	46.1256	3.06851	60.3764	2.97318	134.523
FBgn0026160	64.7511	184.265	361.703	462.342	582.262	495.694	72.6587	530.72
FBgn0026169	21.1937	4.05898	51.2014	34.9752	17.6206	54.346	17.2811	4.46737
FBgn0026179	293.805	157.303	438.281	749.308	258.007	569.244	1052.52	887.967
FBgn0026181	634.017	681.605	484.352	354.449	405.646	563.29	278.595	290.94
FBgn0026189	197.715	206.775	301.34	414.372	386.844	224.497	300.881	169.221
FBgn0026190	1.67154	1.67428	1.66732	1.66298	1.68282	3.86806	5.44874	1.69608
FBgn0026192	44.2013	2.68796	37.134	72.7426	2.90077	26.5508	53.5826	3.203
FBgn0026196	775.343	619.375	135.083	44.4287	86.4965	49.3089	3.44753	5.25597
FBgn0026197	7.039	27.6793	9.95492	2.81861	2.92808	11.2474	3.74756	2.99978
FBgn0026199	61.5295	112.883	64.2751	1.98085	93.5233	66.4439	206.662	58.6082
FBgn0026206	287.724	576.211	126.814	117.247	100.376	201.67	11.9948	170.84
FBgn0026207	22.7855	47.425	17.9407	2.28005	19.2781	2.38404	2.49017	2.66424
FBgn0026238	252.619	5.80747	173.614	138.327	60.6774	144.276	132.91	138.299
FBgn0026239	474.512	505.165	907.179	698.416	367.547	282.207	498.103	466.314
FBgn0026250	512.493	260.666	448.51	630.989	499.747	364.22	789.448	493.099
FBgn0026252	1146.39	1166.23	260.429	261.857	243.247	156.466	1.89575	11.309
FBgn0026257	8.54922	2.82027	4.90833	2.88981	2.82871	3.6464	4.99515	2.84224
FBgn0026259	1243.65	788.253	725.21	424.218	391.26	297.02	138.509	290.117
FBgn0026261	8.17627	1.53499	6.05009	1.50943	1.55365	1.52849	1.54836	1.5817
FBgn0026262	247.598	533.228	159.179	167.366	219.777	130.388	4.63228	279.37
FBgn0026263	53.086	2.25999	11.2471	21.1389	2.35384	19.0191	2.32736	2.49309
FBgn0026309	37.8591	69.6371	7.78345	19.1583	29.2751	15.7666	3.52725	3.80311
FBgn0026313	159.995	97.1939	72.7701	49.8346	139.99	54.724	56.7454	4.25555
FBgn0026315	0.621865	1.44173	0.560844	29.5774	0.786397	0.61953	0.741304	419.479
FBgn0026316	82.1545	90.3495	28.4535	0.961328	1.42847	12.0662	1.38124	1.65975
FBgn0026317	83.2195	2.05443	71.2169	22.2596	75.7426	18.2864	2.22435	2.61183
FBgn0026319	25.1432	1.78924	67.2965	93.4856	98.8528	300.049	62.9648	2.69063
FBgn0026323	217.871	93.4991	102.02	48.756	104.336	26.3733	4.58728	366.81
FBgn0026324	2.15614	1.52822	2.10483	1.52744	1.52883	1.52801	1.52865	1.52982
FBgn0026326	37.307	2.82848	27.2749	30.3651	19.8067	3.5448	2.9046	3.09162
FBgn0026369	250.158	143.782	135.986	40.2588	149.687	100.694	2.80313	73.3478
FBgn0026370	469.183	642.58	327.253	57.1043	470.789	289.567	233.229	207.791
FBgn0026371	48.7312	3.92049	18.1037	38.4367	2.93526	29.3388	83.4104	3.22205
FBgn0026372	3504.03	3040.32	3132.49	1260.52	2513.39	1515.13	916.444	1659.83
FBgn0026373	33.4913	71.9584	6.51061	1.51876	27.1262	1.67987	1.83083	3.99934
FBgn0026374	16.2897	1.37682	62.555	1.36903	37.3921	104.882	213.458	2.01842
FBgn0026375	181.477	413.416	238.153	139.493	302.593	204.436	313.655	16.688
FBgn0026376	192.422	5.21326	386.978	318.737	289.287	323.276	265.46	120.877
FBgn0026378	30.7835	97.7393	27.8713	90.4923	4.73928	19.1748	7.2189	3.26889
FBgn0026379	61.0541	96.8417	26.1266	78.925	14.0312	48.1538	5.56101	146.535
FBgn0026380	72.1338	2.23489	29.581	31.1258	34.787	4.52541	2.35181	2.62606
FBgn0026388	2.26984	59.1794	3.30976	29.4047	27.8968	19.2114	2.40845	2.63381
FBgn0026393	2.39114	2.39417	4.63588	2.38182	4.83093	8.93481	2.40095	2.41885
FBgn0026396	1.65792	1.65948	2.91326	4.21806	1.66436	1.65782	1.66295	1.67204
FBgn0026400	14.2095	1.91765	13.564	1.86119	1.95833	6.60572	1.94684	2.01882
FBgn0026401	322.927	869.567	319.762	330.058	404.276	572.368	183.726	289.68
FBgn0026402	12.8135	3.5811	10.4936	18.6009	16.1205	3.5679	3.60875	3.68065
FBgn0026404	160.572	187.427	61.5281	43.7632	72.8114	141.84	30.9098	3.77735
FBgn0026409	787.289	604.648	656.275	116.527	996.945	391.838	2.29579	497.927
FBgn0026411	7.83991	10.9035	10.8129	20.7659	14.7599	12.5249	12.4151	18.5747
FBgn0026415	115.649	204.518	12.2653	8.04237	3.05577	14.4029	1.41433	1.77765
FBgn0026417	24.6399	4.22452	23.7485	4.10761	29.4439	20.8343	4.28695	17.3408
FBgn0026418	895.349	1097.69	564.685	464.551	505.156	264.891	636.649	6.99152
FBgn0026427	381.036	484.82	220.979	89.0034	80.3141	316.731	352.122	3.34334
FBgn0026428	59.1198	133.424	43.9432	1.79239	57.5897	71.5102	4.25523	5.71476
FBgn0026430	144.38	298.018	28.4424	47.4966	6.17571	36.8063	127.685	2.87461
FBgn0026431	6.45563	4.00084	10.2366	16.7704	3.53521	3.49777	12.1783	3.57931
FBgn0026432	13.2194	46.6763	10.0644	3.93692	18.9141	24.7491	3.8608	5.86247
FBgn0026433	69.5291	49.8442	36.1154	40.8677	26.2273	34.6915	49.9135	5.93142
FBgn0026439	4.43942	3.72687	8.90635	16.5446	3.74997	22.748	3.7433	4.85089
FBgn0026441	138.349	77.5084	122.533	56.0733	2.94227	116.909	119.002	6.67611
FBgn0026479	104.294	1.71089	118.86	93.7558	117.952	171.738	1.97139	5.33082
FBgn0026533	524.728	432.737	288.579	60.4226	210.798	89.2922	43.5917	3.09039
FBgn0026562	47.761	1.44178	34.6034	1.26587	2.77563	25.1078	1.5233	1.70806
FBgn0026566	16.1311	1.60876	5.40584	1.53967	13.7094	1.59155	1.64347	1.72667
FBgn0026570	10.0441	3.98206	6.63406	11.0249	3.999	14.9939	3.99411	4.02629
FBgn0026573	196.266	158.34	42.4037	1.91702	47.6037	53.4971	101.983	2.92455
FBgn0026575	778.366	779.875	407.095	199.429	306.762	357.538	11.7632	110.412
FBgn0026576	97.8225	154.803	96.4021	158.306	52.5646	69.3984	3.05574	175.227
FBgn0026577	410.287	250.13	228.356	158.29	301.212	240.277	2.193	11.904
FBgn0026582	20.7727	102.042	26.2157	42.7433	42.2664	32.477	3.84859	6.94922
FBgn0026592	10.7526	2.62896	14.4232	25.3755	3.59363	2.61234	2.66332	4.09633
FBgn0026593	4.18808	2.11166	13.2421	1.92701	15.827	32.5358	65.1134	2.41839
FBgn0026597	147.088	80.4598	56.4161	69.3829	61.076	46.9632	3.19359	6.86567
FBgn0026598	69.8485	3.70835	11.9936	22.9125	25.7853	5.47534	2.81736	5.09506
FBgn0026602	52.9874	86.0788	80.3529	142.192	96.9686	150.305	5.71811	137.073
FBgn0026616	353.555	341.78	91.5022	96.2574	129.092	110.972	33.7719	289.557
FBgn0026619	48.2847	3.7348	18.2343	33.8489	2.87828	36.0201	4.14322	3.06973
FBgn0026620	379.252	852.109	198.143	213.59	216.769	211.852	529.143	205.712
FBgn0026630	74.8095	78.2646	40.0903	1.94432	45.27	31.3931	2.48539	2.88173
FBgn0026634	38.378	65.7684	29.714	38.4401	24.9053	56.9815	4.16171	4.54059
FBgn0026666	2.13804	2.14555	4.83044	8.78272	2.16874	10.6855	2.16213	2.20435
FBgn0026679	126.612	2.71822	29.2583	39.5214	57.037	36.9689	89.2278	3.46893
FBgn0026702	25.9033	1.75084	4.646	1.88753	6.5638	27.041	1.80788	1.94252
FBgn0026713	392.999	680.613	338.079	412.849	293.867	322.263	178.066	418.854
FBgn0026718	111.699	138.297	54.0484	90.4247	29.6199	56.7202	19.4371	4.1276
FBgn0026721	14.2069	25.0747	1.47598	1.43505	10.1183	2.09309	1.5868	1.70317
FBgn0026722	163.862	83.5826	58.7159	94.8232	18.558	41.3489	134.464	3.92206
FBgn0026737	3.87526	2.30066	3.50031	2.29524	2.30489	5.32372	2.30367	2.3117
FBgn0026738	16.4909	3.96001	11.1436	10.4867	3.97821	6.57499	3.97295	4.00752
FBgn0026741	12.8834	2.99573	10.5905	2.96768	3.01733	13.0791	3.01111	3.05161
FBgn0026749	55.2617	22.7577	44.5715	13.2204	24.5858	82.3002	87.3921	7.88425
FBgn0026751	13.2207	2.04252	7.84957	1.9885	2.08178	14.6545	2.07067	2.14068
FBgn0026753	838.039	299.163	459.495	340.994	410.574	287.366	465.773	25.4603
FBgn0026761	119.894	246.734	46.5399	40.6851	38.257	2.60065	3.52762	2.35232
FBgn0026777	332.652	107.779	133.369	5.53387	17.1082	126.717	157.834	2.83985
FBgn0026778	2.63805	1.5591	5.37609	14.7466	1.59374	1.96186	2.23715	1.64457
FBgn0026787	59.2951	93.6759	28.3166	111.855	31.1539	1.81187	2.10165	2.53164
FBgn0026869	266.604	505.697	332.306	470.234	439.561	327.548	38.4005	366.331
FBgn0026872	20.1004	1.46971	9.99164	23.782	1.54285	1.44298	1.5226	1.6452
FBgn0026873	6.91279	3.50902	7.41743	3.49493	8.96349	6.0255	3.51683	3.53766
FBgn0026876	3.40332	1.72812	2.30189	1.57805	1.58389	1.58048	1.58316	1.58797
FBgn0026879	188.483	1.1842	72.8128	0.727668	13.1433	24.2063	176.369	1.7934
FBgn0027052	22.5173	1.533	10.6464	1.44146	1.59525	11.8594	1.57794	1.68365
FBgn0027053	119.892	161.122	28.5425	57.894	64.8384	24.2723	2.72153	6.2386
FBgn0027054	11.627	1.29037	9.09445	1.39918	1.32366	1.27844	1.31436	1.37146
FBgn0027055	25.1498	3.53389	18.4888	31.6217	4.6949	10.7426	4.57406	3.70091
FBgn0027057	145.017	107.37	18.0491	44.168	63.3995	19.9512	2.49783	3.01447
FBgn0027066	273.411	156.661	229.427	287.043	261.862	219.399	509.929	527.773
FBgn0027070	10.9639	2.24576	5.75921	2.21305	11.1179	2.23735	2.26326	2.30796
FBgn0027073	1.62853	1.62912	2.84774	1.62674	1.63098	3.03981	1.63044	1.63398
FBgn0027079	488.553	448.99	153.437	34.771	248.114	39.9449	184.752	6.38717
FBgn0027080	212.906	2.69422	137.531	37.3554	361.183	166.3	1.66416	4.98382
FBgn0027081	490.796	525.328	196.046	225.895	270.627	90.4666	2.33425	311.103
FBgn0027082	9.6833	22.7749	2.27384	1.84941	11.0111	1.91099	1.9733	3.42365
FBgn0027083	16.9865	9.20479	5.67631	1.1282	1.1477	0.960169	1.11113	273.696
FBgn0027084	484.716	423.357	124.411	68.3073	97.7886	78.3106	1.90034	5.5611
FBgn0027085	21.4335	78.8024	30.0165	1.97061	71.1967	23.7699	2.43481	2.78045
FBgn0027086	313.248	183.535	109.013	46.407	232.746	113.119	149.032	570.731
FBgn0027087	287.116	357.057	106.901	119.476	195.437	202.443	109.664	3.56693
FBgn0027088	290.383	149.727	157.086	79.4356	188.886	142.294	135.673	292.227
FBgn0027090	113.278	75.2729	54.058	35.4874	86.4207	72.0504	3.05788	3.63889
FBgn0027091	92.4421	63.9383	45.0862	53.4353	67.5089	87.6566	3.29615	3.86092
FBgn0027093	158.902	3.04528	35.4531	72.3665	55.2817	7.41378	3.60251	2.41419
FBgn0027094	430.735	233.036	289.506	355.153	259.745	131.274	187.575	298.594
FBgn0027095	106.513	95.734	145.905	152.559	224.097	72.1589	2.31682	3.03735
FBgn0027101	136.2	87.3676	100.825	105.421	50.7928	205.991	261.286	152.407
FBgn0027106	354.7	85.7962	386.165	636.369	1043.18	584.456	808.086	805.042
FBgn0027108	445.234	158.839	1132.22	941.199	1494.49	1174.04	962.722	929.294
FBgn0027111	1.10373	1.12227	1.07366	17.4324	1.17566	1.10253	13.9502	2.40573
FBgn0027259	3.81764	1.6642	3.04709	1.6597	1.66767	1.66302	1.66667	1.67321
FBgn0027279	357.379	585.281	313.536	194.895	85.8542	247.098	293.455	457.417
FBgn0027280	206.945	5.10656	236.144	278.655	396.53	287.626	332.067	575.376
FBgn0027287	574.469	612.001	1102.17	985.781	789.638	373.217	352.796	694.377
FBgn0027291	273.431	227.741	208.724	82.9949	163.683	44.1661	53.2576	7.0182
FBgn0027296	11.9677	38.1559	16.3007	37.6799	33.3269	3.32659	3.45387	3.6662
FBgn0027329	601.311	851.006	242.832	216.118	174.653	168.517	4.33239	242.916
FBgn0027330	171.964	182.224	59.4161	16.1945	31.1116	10.5189	1.90881	2.41869
FBgn0027334	18.9999	0.885513	8.57776	0.807961	0.934208	1.33676	0.920928	1.01083
FBgn0027335	516.611	639.353	501.462	643.286	296.267	910.634	1559.52	943.14
FBgn0027338	580.974	399.178	383.457	405.145	295.381	332.838	267.812	213.712
FBgn0027339	260.635	205.544	569.12	502.431	995.083	472.326	380.689	924.375
FBgn0027341	1.50899	1.14764	1.4302	1.14722	1.14797	1.14753	1.14788	1.14851
FBgn0027342	81.0137	202.708	38.765	58.5903	92.5046	16.5562	5.29526	87.706
FBgn0027343	23.9334	116.233	74.7334	111.71	4.92285	122.218	139.273	3.34549
FBgn0027348	81.6791	320.667	0.454536	0.346216	0.727838	9.03154	0.681137	0.967766
FBgn0027356	207.552	12.6222	144.27	199.679	96.9448	175.368	213.017	172.588
FBgn0027358	38.1642	3.48519	17.9871	44.8317	25.5769	17.0099	3.57412	3.79506
FBgn0027359	24.8671	49.873	7.43399	2.7435	14.8744	2.06912	2.17593	2.34604
FBgn0027360	68.7547	1.79606	13.7734	1.91983	1.94261	11.1644	4.27772	55.9566
FBgn0027363	150.368	111.594	214.035	194.727	124.163	177.197	169.56	213.484
FBgn0027364	76.3282	2.49882	84.7243	37.1081	21.0662	44.3868	4.30444	3.06681
FBgn0027375	13.9146	2.72182	11.5454	2.82975	2.74793	10.4004	2.74045	2.78867
FBgn0027376	3.39189	45.9096	11.8749	27.7044	2.7964	10.7995	2.7698	4.72244
FBgn0027378	9.43272	2.26505	4.16758	6.90351	2.28208	2.5645	2.2772	2.30859
FBgn0027453	23.4409	67.4492	30.1308	33.6633	44.9762	19.1154	4.21522	4.53945
FBgn0027490	79.2073	98.6501	48.3246	1.70852	84.0607	48.4831	6.26887	185.846
FBgn0027491	6.42785	2.61423	4.56176	2.60477	2.62158	6.38661	2.61946	2.63335
FBgn0027492	661.486	705.358	464.075	931.907	568.813	638.324	239.102	603.92
FBgn0027493	392.078	103.009	197.16	93.5616	34.7371	38.3975	168.181	250.437
FBgn0027494	4.74944	9.90307	0.980353	0.966044	1.02664	0.993105	1.01978	1.06258
FBgn0027495	52.4087	3.69356	44.9805	74.3869	75.1322	16.985	2.52076	187.567
FBgn0027496	111.773	165.594	109.904	57.1694	192.362	88.8302	2.568	6.40957
FBgn0027497	65.0043	3.69843	83.3524	79.0655	48.9617	69.9649	2.56268	3.03724
FBgn0027498	8.14501	2.24675	6.12827	2.2298	2.25966	4.07918	2.25596	2.27992
FBgn0027499	120.216	193.334	138.699	123.548	130.009	79.0382	4.55873	3.30982
FBgn0027500	234.731	290.493	15.8303	0.403933	0.955845	23.3195	0.902432	1.21598
FBgn0027503	96.8249	1.72206	48.9314	26.0015	1.92585	59.8712	1.87006	4.4625
FBgn0027504	452.71	481.34	243.322	431.029	224.898	179.813	226.564	484.326
FBgn0027505	46.021	49.7631	52.8538	1.76486	105.279	43.911	2.34935	2.76903
FBgn0027506	293.436	506.394	168.647	184.225	211.212	283.901	372.85	10.3501
FBgn0027507	127.908	117.232	38.0777	1.10884	1.8648	24.3997	95.744	2.24233
FBgn0027508	98.5355	18.7103	109.231	223.731	148.76	149.466	2.28764	5.98732
[truncated: 7,220 more rows]
